# Supplementary material
Source: PubMed Central journal article supplement (PMC6065086)
Supplement: ASN.2017080878SupplementaryData1.pdf [file ASN.2017080878SupplementaryData1.pdf]

# **SUPPLEMENTAL INFORMATION**

## **Somatic Mutations in Renal Cyst Epithelium in Autosomal Dominant Polycystic Kidney Disease**

Adrian Y. Tan<sup>1,2</sup>, Tuo Zhang<sup>2</sup>, Alber Michael<sup>1</sup>, Jon Blumenfeld<sup>3,4</sup>, Genyan Liu<sup>1</sup>, Wanying Zhang<sup>1</sup>, Zhengmao Zhang<sup>1</sup>, Yi Zhu<sup>1</sup>, Lior Rennert<sup>5</sup>, Che Martin<sup>1</sup>, Jenny Xiang<sup>2</sup>, Steven P. Salvatore<sup>1</sup>, Brian D. Robinson<sup>1</sup>, Sandip Kapur<sup>6</sup>, Stephanie Donahue<sup>4</sup>, Warren O. Bobb<sup>4</sup>, and  
\*Hanna Rennert<sup>1</sup>

Departments of Pathology and Laboratory Medicine<sup>1</sup>, Microbiology<sup>2</sup>, Medicine<sup>3</sup>, and Surgery<sup>6</sup>, Weill Cornell Medicine, The Rogosin Institute<sup>4</sup>, New York, NY, Department of Biostatistics, University of Pennsylvania<sup>5</sup>, Philadelphia, PA<sup>5</sup>

### **Table of Contents**

|                                                                                                                                                                      |    |
|----------------------------------------------------------------------------------------------------------------------------------------------------------------------|----|
| <b>SUPPLEMENTAL FIGURES</b> .....                                                                                                                                    | 3  |
| Figure S1. Schematic diagram of the ADPKD mutation analysis study protocol .....                                                                                     | 3  |
| Figure S2. Blood and renal cyst DNAs heterozygous and homozygous for c.6364delG, p.V2122fs, respectively, detected by whole exome sequencing (WES) analysis .....    | 5  |
| Figure S3. Distribution of somatic changes by alteration type and by cyst across all patients. Alterations are colored according to mutation type .....              | 8  |
| Figure S4. <i>PKD1</i> and <i>PKD2</i> gene coverage by Exon .....                                                                                                   | 9  |
| Figure S5. Copy number variations (CNVs) in <i>PKD1</i> and <i>PKD2</i> .....                                                                                        | 10 |
| Figure S6. Illustration of the data analysis pipelines .....                                                                                                         | 14 |
| Figure S7. Distribution of significant somatic alterations in patients' cysts samples ....                                                                           | 15 |
| <b>SUPPLEMENTAL TABLES</b> .....                                                                                                                                     | 17 |
| Table S1. Summary of constitutional mutations in study cohort (n=9).....                                                                                             | 17 |
| Table S2. <i>PKD</i> gene sequence analysis summary statistics of cysts analyzed.....                                                                                | 18 |
| Table S3. Summary of constitutional and somatic mutations in <i>PKD</i> genes detected by LR-PCR sequencing and WES in individual renal cysts by subject (N=9) ..... | 19 |
| Table S4. WES analysis quality metrics (n=55) .....                                                                                                                  | 23 |
| Table S5. Classification of somatic alterations (SNV/indels) detected by WES in cyst renal epithelia (N=65) .....                                                    | 25 |

|                                                                                                                                                                 |           |
|-----------------------------------------------------------------------------------------------------------------------------------------------------------------|-----------|
| Table S6. Pathogenic and probably pathogenic mutations by variant allele frequency                                                                              | 26        |
| Table S7. Significantly pathogenic (truncation/indels) and probably pathogenic (CADD score>15) gene variations with VAF >20% among the renal cyst samples ..... | 28        |
| Table S8. List of genes associated with ciliopathy disorders (N=211).....                                                                                       | 36        |
| Table S9. Gene variations in principal ciliopathy genes .....                                                                                                   | 37        |
| Table S10. Gene variations in principal cancer genes .....                                                                                                      | 38        |
| Table S11. Copy number alterations (CNAs) in most commonly altered (>4 CNV) genes among the cyst samples. ....                                                  | 41        |
| Table S12. Copy number variation in <i>PKD</i> genes by renal cyst.....                                                                                         | 49        |
| Table S13. WES analysis results of significantly mutated genes (n=53) in renal cyst epithelium by MuSiC.....                                                    | 50        |
| Table S14. Constitutional pathogenic mutations in principal ciliopathy genes.....                                                                               | 53        |
| <b>SUPPLEMENTAL STATISTICAL ANALYSIS: Analysis of somatic variant counts by patient age.....</b>                                                                | <b>54</b> |
| I. Analysis of variant counts (N=3,263 variations) in study subjects (N=9) .....                                                                                | 54        |
| II. Analysis of variant counts (N=1,784 variations classified as pathogenic or likely pathogenic) in study subjects (N=9).....                                  | 56        |
| <b>SUPPLEMENTAL METHODS .....</b>                                                                                                                               | <b>58</b> |
| Study Subjects .....                                                                                                                                            | 58        |
| Tissue processing and epithelial cell isolation .....                                                                                                           | 58        |
| Sanger Sequencing.....                                                                                                                                          | 59        |
| Long-range PCR (LR-PCR) Next Generation Sequencing (NGS).....                                                                                                   | 59        |
| Whole Exome Sequencing (WES) and Data Analysis .....                                                                                                            | 59        |
| Significantly mutated genes and pathway analysis .....                                                                                                          | 60        |
| Droplet Digital PCR .....                                                                                                                                       | 62        |
| Statistical Analysis.....                                                                                                                                       | 62        |
| <b>REFERENCES.....</b>                                                                                                                                          | <b>63</b> |

## SUPPLEMENTAL FIGURES

### Supplemental Figure 1

#### Schematics of ADPKD mutation analysis study protocol

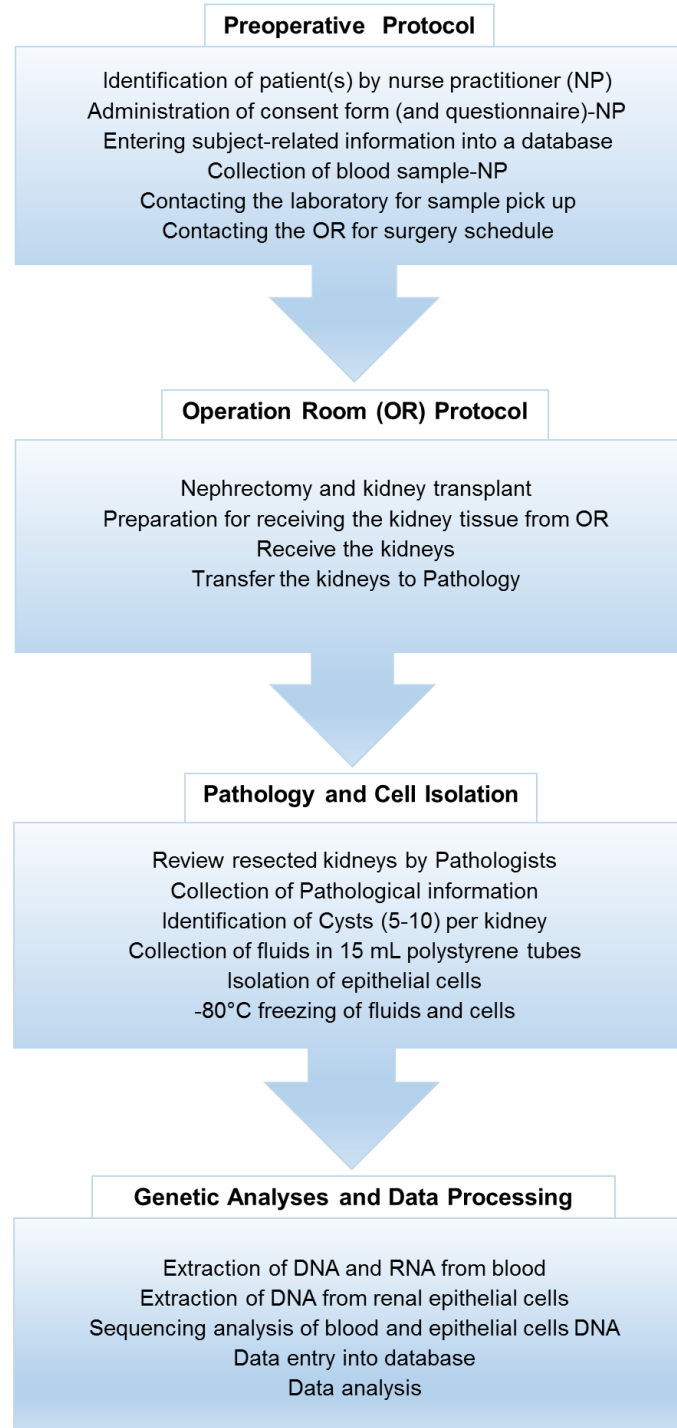

**Figure S1.** Schematic diagram of the ADPKD mutation analysis study protocol. The study population comprised nine patients with ADPKD scheduled for a living kidney transplant and native kidney removal at the NYPH/WCM campus. The clinical eligibility for nephrectomy was determined by the transplant surgeon prior to enrollment. Prospective study subjects were identified during the pre-transplant evaluation period, following by eligibility assessment and obtaining of informed consent from all subjects. After surgery and pathologist's gross-examination, renal cysts were identified and cyst criteria recorded followed by isolation of the cyst epithelia according to standard procedure (see Methods). Isolated cells were collected by centrifugation and stored at -80°C for further analyses.

## Supplemental Figure 2

a.

*PKD1* c.G10549T: p.E3517X (LOH); Ex35  
(RP9001591, Cyst L11/B21)

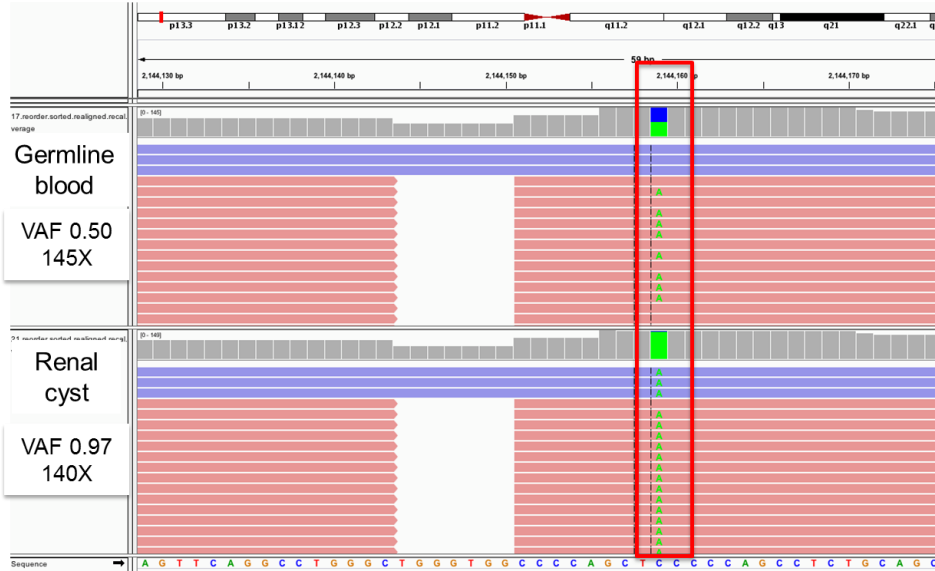

b.

*PKD1* c.10084del, p.Gln3362Serfs\*35: Ex22  
(CDS001574, R10/B12)

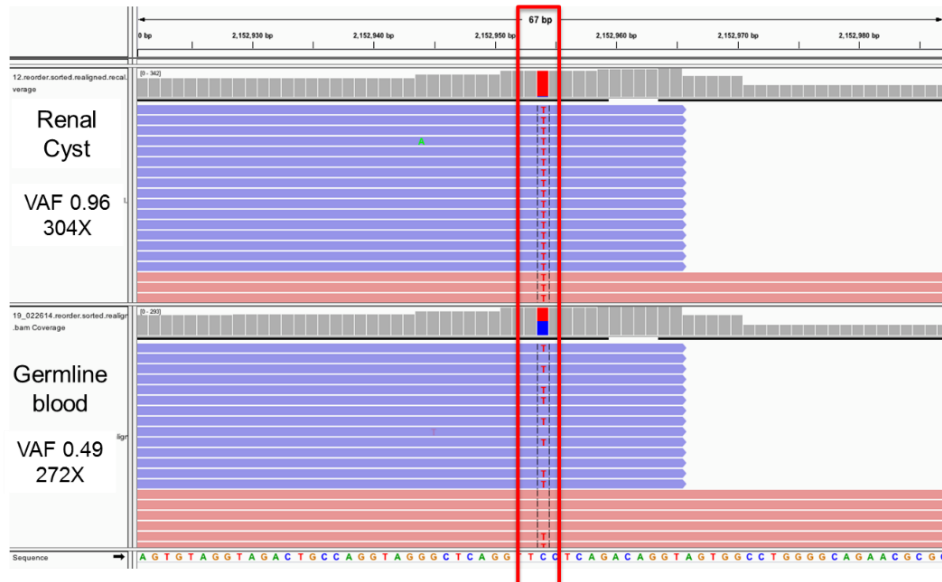

c.

*PKD1* c.3929\_3930del, p.Asp1310Glyfs\*120 (LOH); Ex15  
(BJA001578, R11/A24)

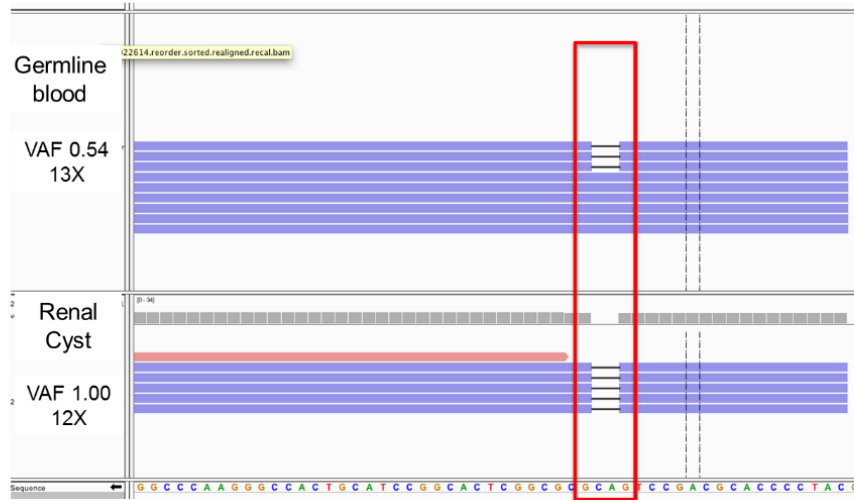

d.

*PKD1* c.9504C>G, p.F3168L (LOH); Ex27  
(DR9001565, L3 /A15)

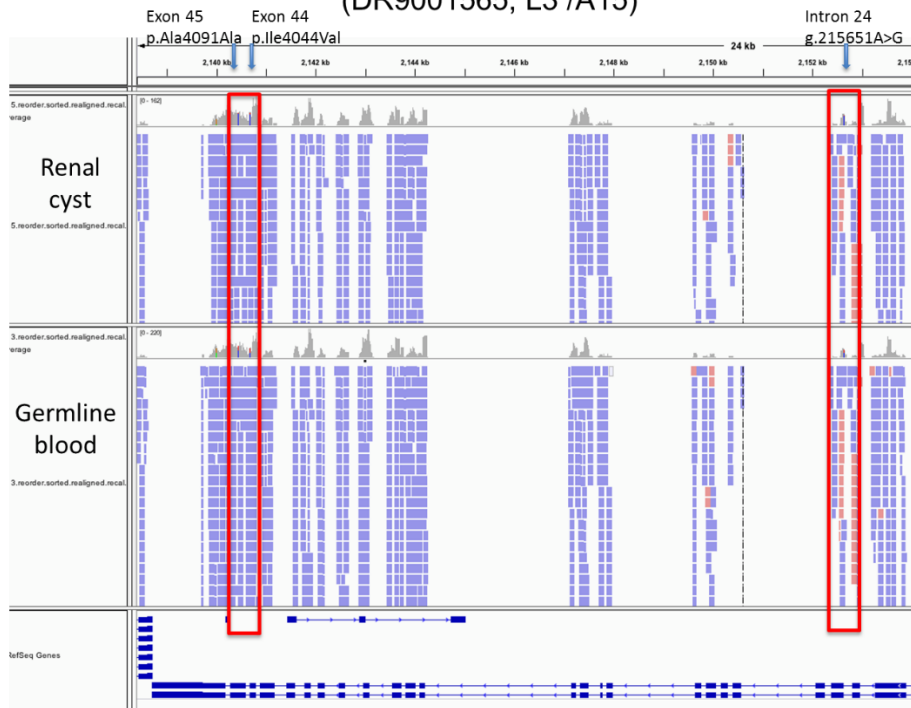

**Figure S2.** Blood and renal cyst DNAs heterozygous and homozygous for c.6364delG, p.V2122fs, respectively, detected by whole exome sequencing (WES) analysis. *PKD1* WES reads are piled up and are shown in Integrative Genomics Viewer (IGV). The mutation total coverage and variant allele frequency (VAF) are displayed for each sample.

WES analysis of PBL constitutional DNA shows no coverage at the mutation site, but *PKD1* Analysis results of renal cyst DNA clearly show LOH for selected SNPs (see table below for coverage and VAF data) at flanking exonic regions of *PKD*. Shown here are *PKD1* exons 23 through 46.

| chr16 | location | <i>PKD1</i><br>Exon/Intron Nomenclature |                         | Germline DNA   |     | Cyst DNA (A15) |     |
|-------|----------|-----------------------------------------|-------------------------|----------------|-----|----------------|-----|
|       |          |                                         |                         | Coverage depth | VAF | Coverage depth | VAF |
| chr16 | 2152651  | Intron24                                | g.215651A>G             | 69             | 57% | 58             | 88% |
| chr16 | 2140680  | Exon44                                  | p.Ile4044Val/c.12130A>G | 71             | 52% | 70             | 84% |
| chr16 | 2140454  | Exon45                                  | p.Ala4091Ala/c.12273A>G | 87             | 59% | 69             | 91% |

### Supplemental Figure 3

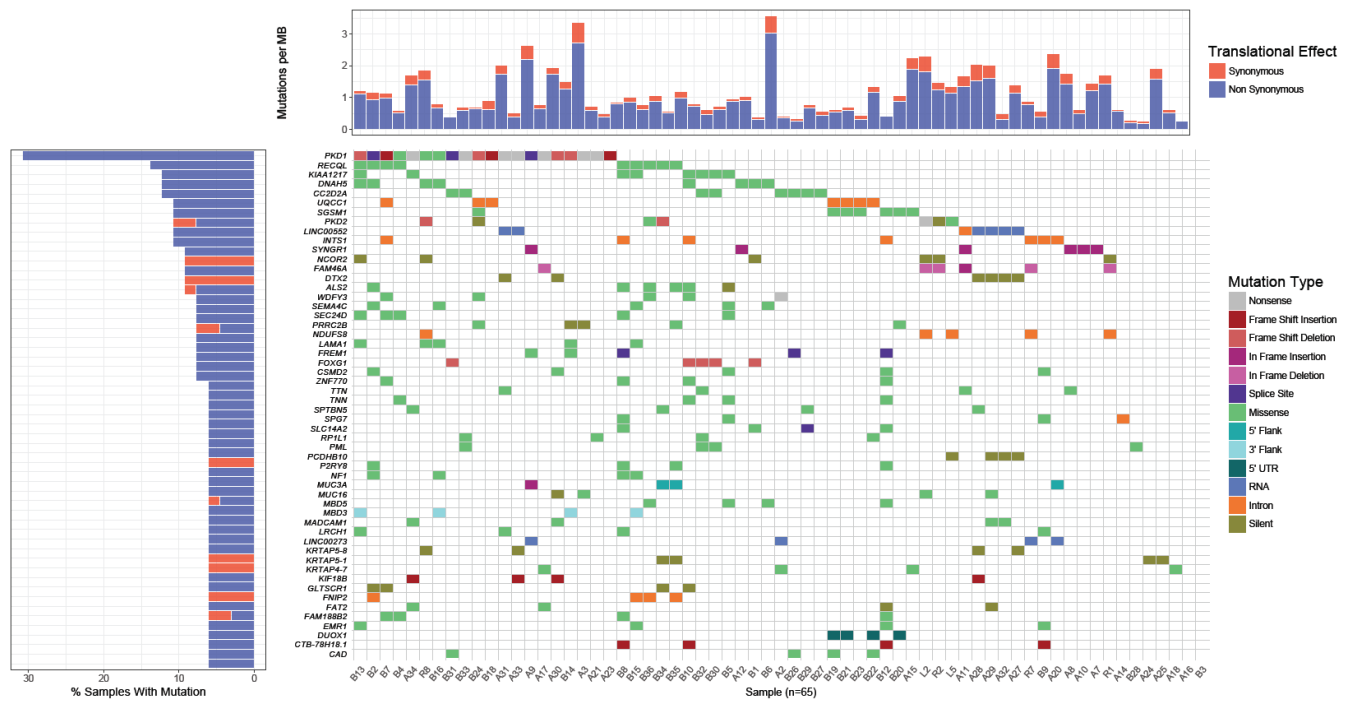

**Figure S3.** Distribution of somatic changes by alteration type and by cyst across all patients. Alterations are colored according to mutation type.



## Supplemental Figure 4

### a. *PKD1* and *PKD2* gene coverage in peripheral blood lymphocytes (PBL)

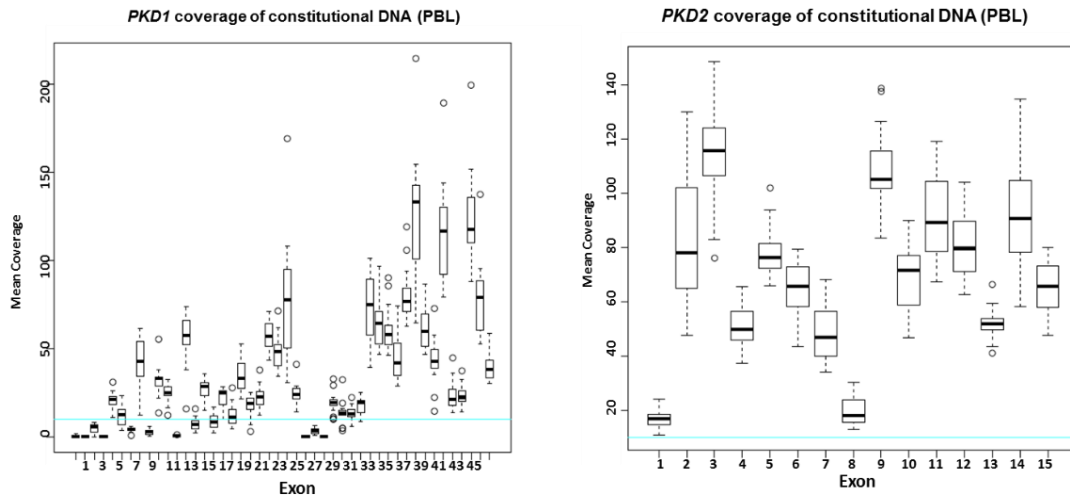

### b. *PKD1* and *PKD2* gene coverage in renal cyst epithelia

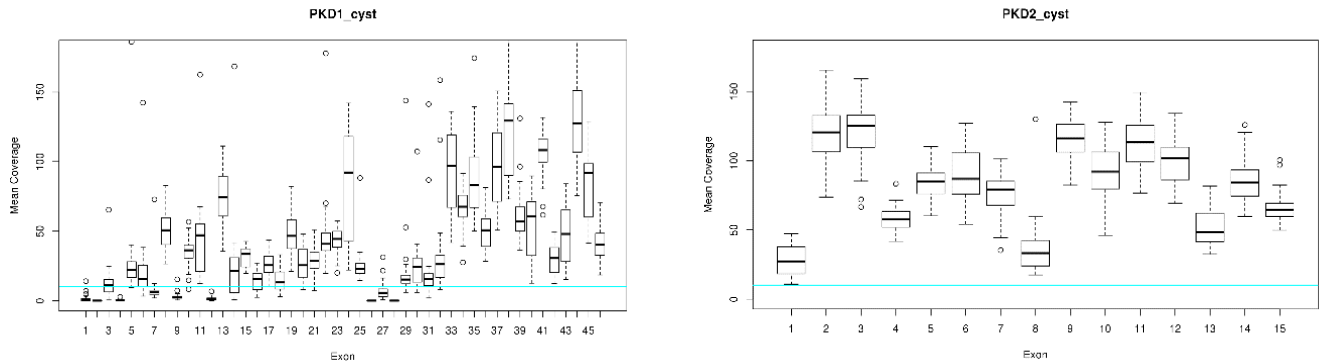

**Figure S4.** *PKD1* and *PKD2* gene coverage by Exon using (a) constitutional peripheral blood lymphocytes (n=18) and (b) renal cyst epithelia cells (n=65). HMW gDNA. PBL, peripheral blood lymphocytes.

## Supplemental Figure 5

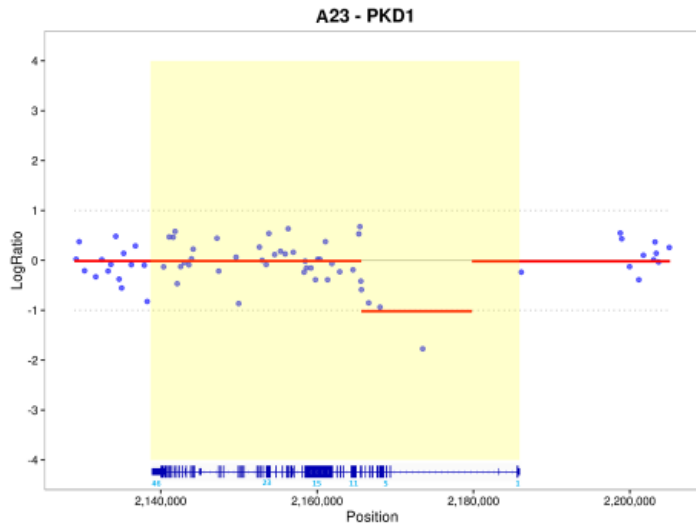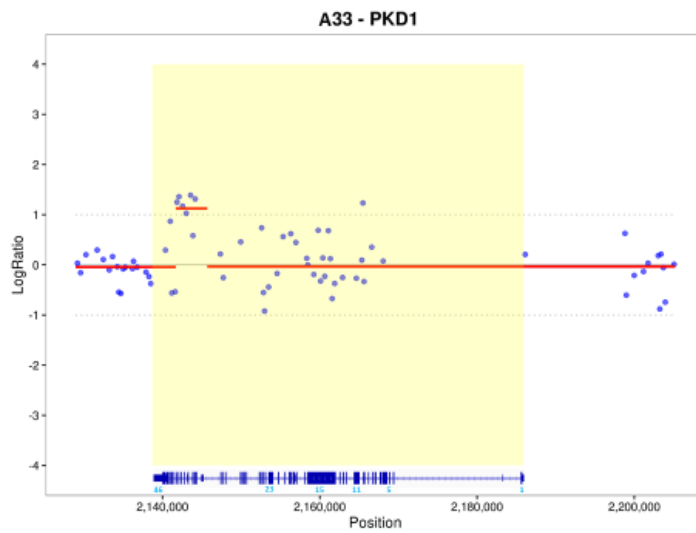

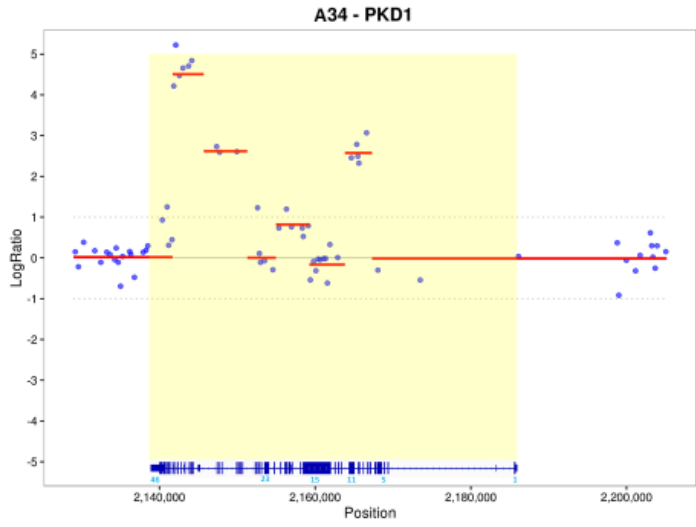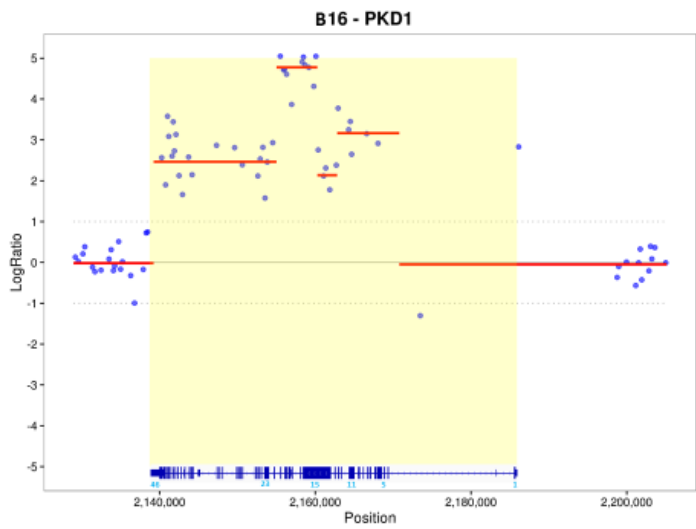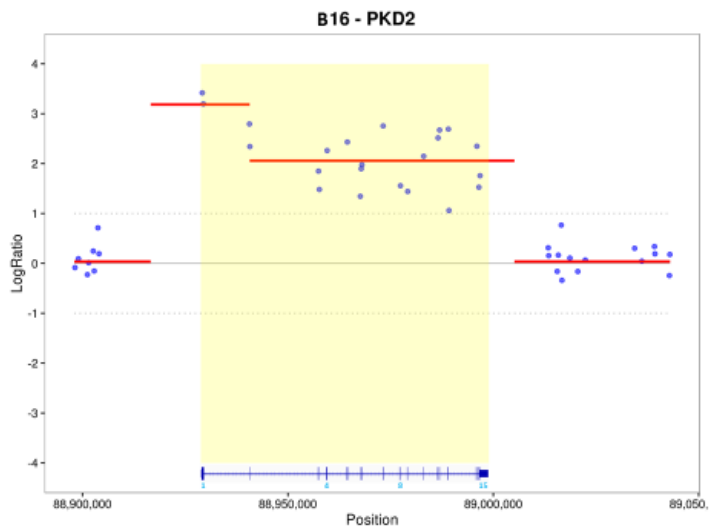

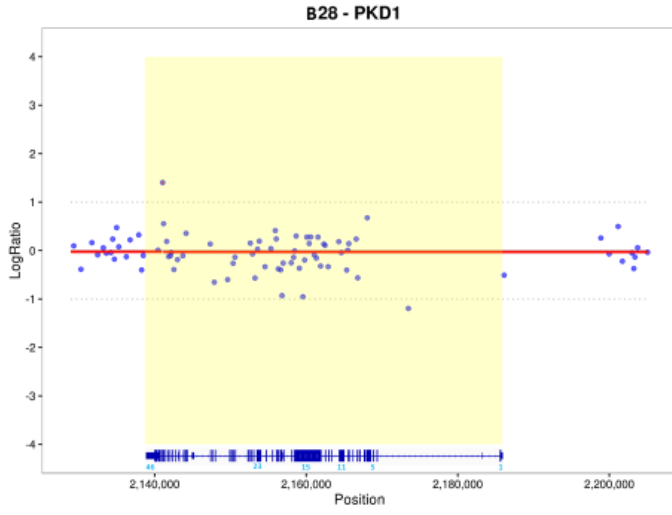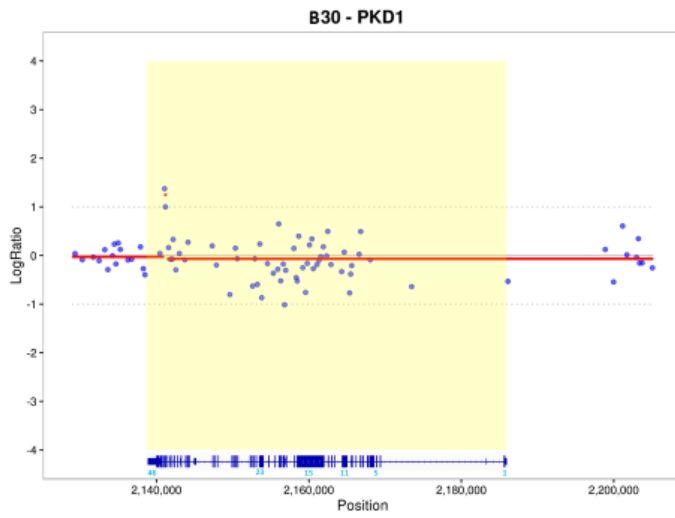

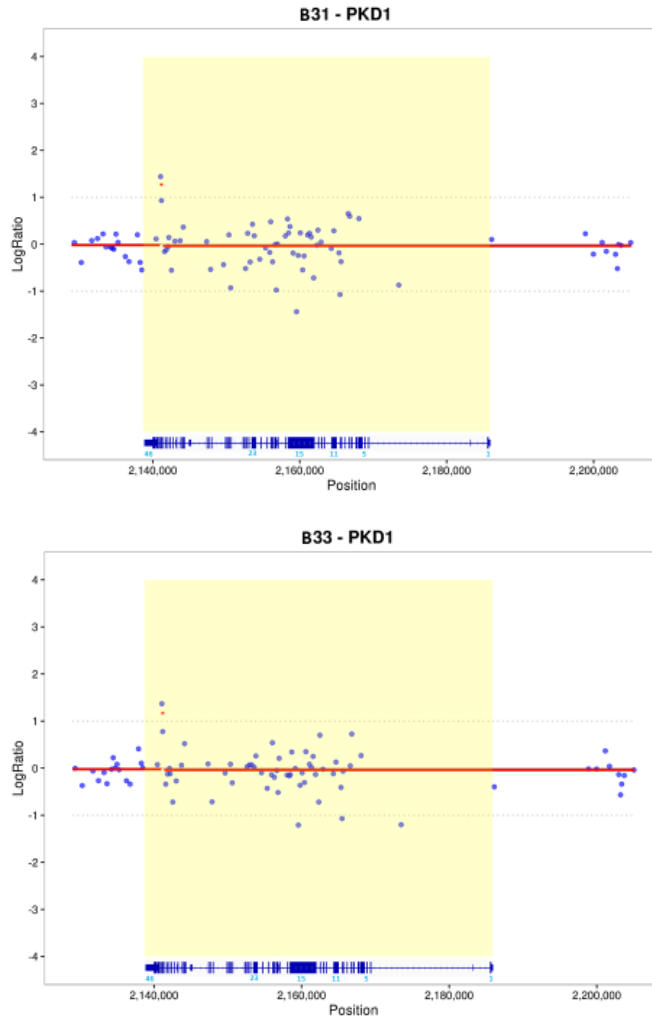

**Figure S5.** Copy number variations (CNVs) in *PKD1* and *PKD2*. Shown here are plots of CNV analysis identified in selected cyst samples (Table 3 in the manuscript) presented as Log<sub>2</sub> Ratio of fold-change at target PKD gene regions. Such alterations can typically affect a single gene to thousands of genes.

Supplemental Figure 6

## WES data analysis pipeline

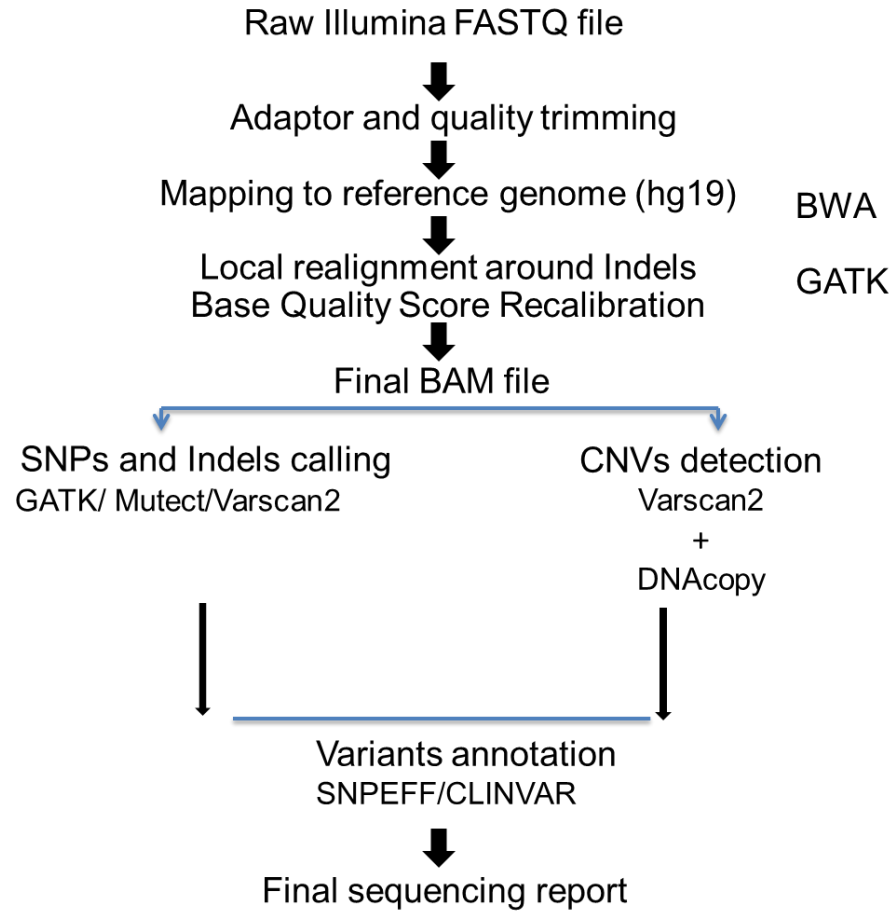

**Figure S6.** Illustration of the data analysis pipelines. Listed are the analysis steps and the corresponding software/application programs involved.

# Supplemental Figure 7

a.

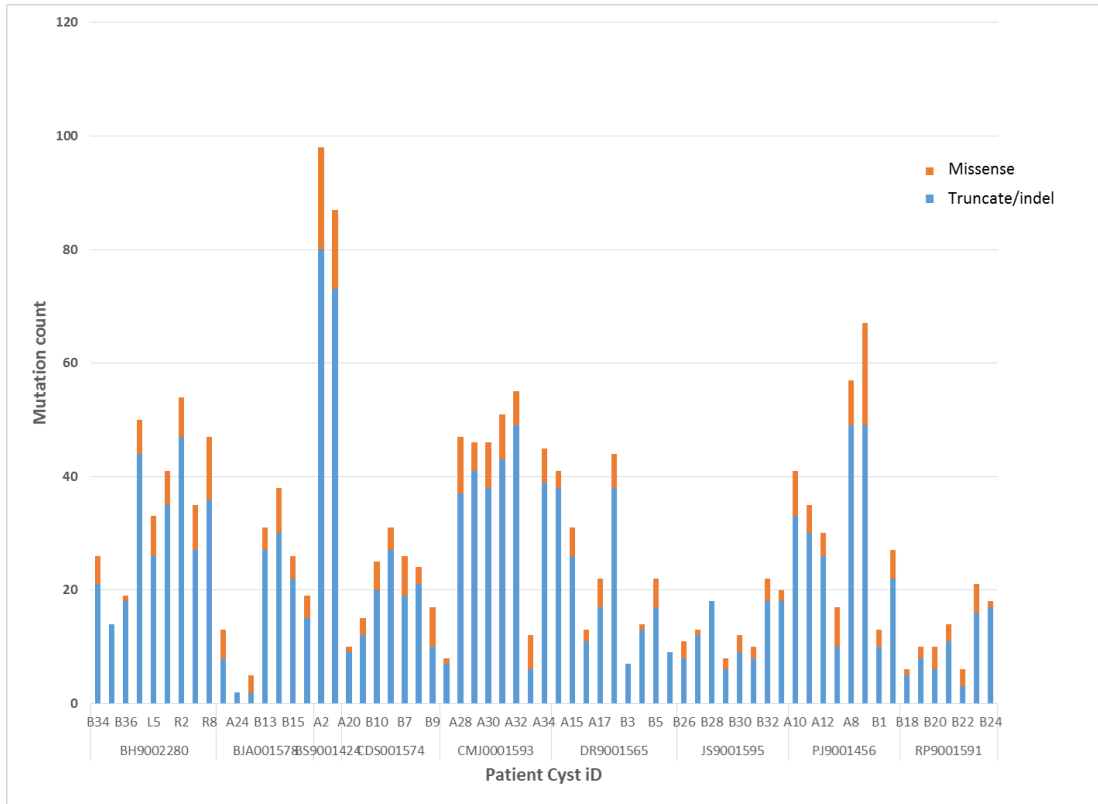

b.

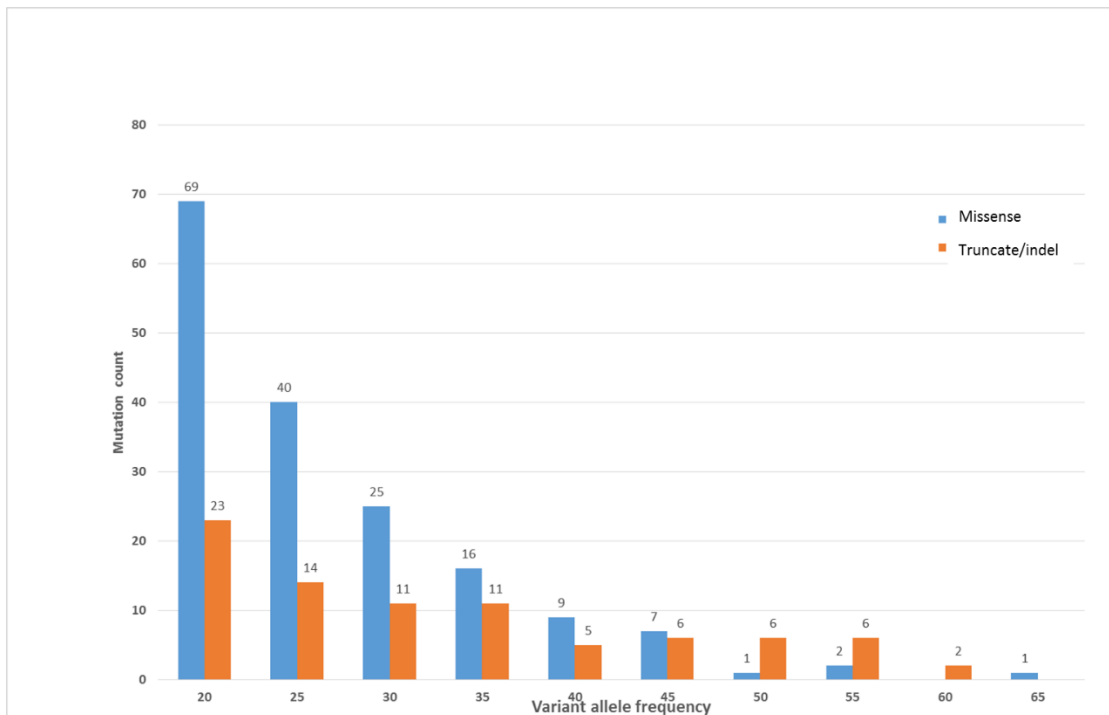

**Figure S7.** Distribution of significant somatic alterations in patients' cysts samples. (a) Distribution of missense ( $CADD \geq 15$ ) and truncation/inframe indels in each cyst by mutation count (a), and (b) mutation count variant allele frequency (VAF). Only mutation with  $VAF \geq 20\%$  are shown. Missesne and truncation/indel alterations are colored in blue and orange, accordingly.



## SUPPLEMENTAL TABLES

**Supplemental Table 1.** Summary of constitutional mutations in study cohort (n=9)

| <b>Case ID</b> | <b>Gene</b> | <b>Exon</b> | <b>Constitutional mutation</b>       | <b>Mutation type</b> | <b>Mutation designation</b> |
|----------------|-------------|-------------|--------------------------------------|----------------------|-----------------------------|
| BS9001424      | <i>PKD1</i> | Exon 15     | c.4745 G>C, p.W1582S (CADD=26.3)     | Missense             | Probable pathogenic         |
| PJ9001456      | <i>PKD1</i> | Exon 15     | c.6364delG, p.V2122fs*3              | Frameshift           | Pathogenic                  |
| DR9001565      | <i>PKD1</i> | Exon 27     | c.9504C>G, p.F3168L(CADD=27)         | Missense             | Probable pathogenic         |
| CDS001574      | <i>PKD1</i> | Exon 31     | c.10084delC, p.Q3362fs*35            | Frameshift           | Pathogenic                  |
| BJA001578      | <i>PKD1</i> | Exon 15     | c.3929_3930het_delAC, P.D1310Gfs*120 | Frameshift           | Pathogenic                  |
| CMJ001593      | <i>PKD1</i> | Exon 43     | c.10406_10407insG, p.E3469fs*2       | Frameshift           | Pathogenic                  |
| RP9001591      | <i>PKD1</i> | Exon 35     | c.G10549T, p.E3517X                  | Nonsense             | Pathogenic                  |
| JS9001595      | <i>PKD1</i> | Exon 15     | c.6743_6744dupA, p.N2248Kfs*14       | Frameshift           | Pathogenic                  |
| BH9002280      | <i>PKD2</i> | Exon 4      | c.923het_delT, p.F308Sfs*9           | Frameshift           | Pathogenic                  |

**Supplemental Table 2. PKD gene sequence analysis summary statistics of cysts analyzed**

| Patient ID | Mutated gene | Sequence Analysis (Total) | WES | Mutation-positive cysts (WES) | LR-NGS/Sanger sequencing | Mutation-positive cysts (LR-PCR sequencing) | Overall mutation detection rate |
|------------|--------------|---------------------------|-----|-------------------------------|--------------------------|---------------------------------------------|---------------------------------|
| BS9001424  | <i>PKD1</i>  | 10                        | 2   | 1                             | 10                       | 9                                           | 90%                             |
| PJ9001456  | <i>PKD1</i>  | 12                        | 8   | 3                             | 12                       | 10                                          | 83%                             |
| DR9001565  | <i>PKD1</i>  | 11                        | 9   | 3                             | 7                        | 7                                           | 100%                            |
| CDS001574  | <i>PKD1</i>  | 8                         | 7   | 3                             | 5                        | 5                                           | 100%                            |
| BJA001578  | <i>PKD1</i>  | 10                        | 7   | 2                             | 9                        | 7                                           | 78%                             |
| CMJ001593  | <i>PKD1</i>  | 8                         | 8   | 4                             | 6                        | 6                                           | 100%                            |
| RP9001591  | <i>PKD1</i>  | 7                         | 7   | 2                             | 3                        | 3                                           | 100%                            |
| JS9001595  | <i>PKD1</i>  | 8                         | 8   | 2                             | 2                        | 2                                           | 100%                            |
| BH9002280  | <i>PKD2</i>  | 9                         | 9   | 9                             | 9                        | 8                                           | 89%                             |
|            | <i>Total</i> | 83                        | 65  | 29                            | 63                       | 57                                          | 90%                             |

**Supplemental Table 3.** Summary of constitutional and somatic mutations in *PKD1/2* genes detected by LR-PCR sequencing and WES in individual renal cysts by subject (N=9)

| Case ID/Gene     | Cyst ID    | WES ID | Cyst diam | Constitutional mutation       | Exon           | Somatic mutation (LR-PCR Sanger)         | Exon/ Intron | Detected by WES (Yes/No) | Cov Depth     | VAF          |
|------------------|------------|--------|-----------|-------------------------------|----------------|------------------------------------------|--------------|--------------------------|---------------|--------------|
| <b>BS9001424</b> | <b>*L1</b> |        | <b>5</b>  | <b>c.4745 G&gt;C,p.W1582S</b> | <b>Exon 15</b> | <b>ND</b>                                | —            | <b>NT</b>                |               |              |
| <i>PKD1</i>      | *L2        |        | 1         | c.4745 G>C,p.W1582S           | Exon 15        | c.4798dup , p.T1600Asnfs*15              | Exon 15      | NT                       |               |              |
|                  | *L3        |        | 2         | c.4745 G>C,p.W1582S           | Exon 15        | c.12216_12217del, p.Thr4073Profs*83      | Exon 45      | NT                       |               |              |
|                  | L4         | A2     | 2.5       | c.4745 G>C,p.W1582S           | Exon 15        | c.348_352del , p.Asn116Lysfs*2           | Exon 3       | No                       |               |              |
|                  | *L5        |        | 1.5       | c.4745 G>C,p.W1582S           | Exon 15        | c.3225del , p.Pro1076Argfs*28            | Exon14       | NT                       |               |              |
|                  | *L6        |        | 2         | c.4745 G>C,p.W1582S           | Exon 15        | c.348_352del , p.Asn116Lysfs*2           | Exon 3       | NT                       |               |              |
|                  | R1         | A3     | 3         | c.4745 G>C,p.W1582S           | Exon 15        | c.11888G>A, p.Trp3963*                   | Exon 43      | Yes                      | 18            | 0.56         |
|                  | *R2        |        | 2         | c.4745 G>C,p.W1582S           | Exon 15        | c.5395C>T, p.Gln1799*                    | Exon 15      | NT                       |               |              |
|                  | *R4        |        | 2.5       | c.4745 G>C,p.W1582S           | Exon 15        | c.3162-2A>C                              | IVS 11       | NT                       |               |              |
|                  | *R5        |        | 1.5       | c.4745 G>C,p.W1582S           | Exon 15        | c.4745 G>C,p.W1582S (LOH)                | Exon 15      | NT                       |               |              |
| <b>PJ9001456</b> | <b>L1</b>  |        | <b>4</b>  | <b>c.6364delG:p.V2122fs</b>   | <b>Exon 15</b> | <b>ND</b>                                | —            | <b>NT</b>                |               |              |
| <i>PKD1</i>      | L4         | A7     | 4         | c.6364delG:p.V2122fs          | Exon 15        | c.6364delG:p.V2122fs (LOH)               | Exon 15      | No                       | ^(804)        | -0.92        |
|                  | L5         | A8     | 5.5       | c.6364delG:p.V2122fs          | Exon 15        | c.348_352del, p.Asn116Lysfs*2            | Exon 3       | No                       | ^(793)        | -0.29        |
|                  | L6         | A9     | 4         | c.6364delG:p.V2122fs          | Exon 15        | c.12006_12010del, p.Gln4004Alafs*151     | Exon 44      | No                       |               |              |
|                  | L7         |        | 3         | c.6364delG:p.V2122fs          | Exon 15        | c.8016+1del                              | Exon 21      | Yes                      | 12<br>^(316x) | 0.5<br>-0.42 |
|                  | L10        | A10    | 5         | c.6364delG:p.V2122fs          | Exon 15        | c.7655_7658 delinsTTG, p.Ala2552Valfs*68 | Exon 19      | No                       | ^(779x)       | -0.32        |
|                  | L11        | A11    | 2.5       | c.6364delG:p.V2122fs          | Exon 15        | c.3745del, p.Asp1249Thrfs*24             | Exon 15      | No                       | ^(671x)       | -0.23        |
|                  | L12        |        | 2.5       | c.6364delG:p.V2122fs          | Exon 15        | c.6364delG:p.V2122fs (LOH)               | Exon 15      | NT                       | ^(638x)       | -0.9         |
|                  | *L15       |        | 7         | c.6364delG:p.V2122fs          | Exon 15        | c.1284_1292del, p.Trp429_Gln431del       | Exon 6       | NT                       | ^(748x)       | -0.3         |
|                  | R4         | B1     | 3.1       | c.6364delG:p.V2122fs          | Exon 15        | c.3831_3847del, p.Ser1278Glyfs*17        | Exon 15      | No                       |               |              |
|                  | R7         | B2     | 2.5       | c.6364delG:p.V2122fs          | Exon 15        | c.12004-2_12019del (splice_acceptor)     | Exon 44      | Yes                      | 193           | 0.23         |
| <b>R16</b>       | <b>A12</b> |        | <b>6</b>  | <b>c.6364delG:p.V2122fs</b>   | <b>Exon 15</b> | <b>ND</b>                                | —            | <b>No</b>                |               |              |
| DR9001565        | L1         | A14    | 8         | c.9504C>G,p.F3168L            | Exon 27        | NT                                       | —            | No                       |               |              |

|             |           |     |          |                                           |                |                                             |         |           |     |      |
|-------------|-----------|-----|----------|-------------------------------------------|----------------|---------------------------------------------|---------|-----------|-----|------|
| <i>PKD1</i> | *L3       | A15 | 4        | c.9504C>G,p.F3168L                        | Exon 27        | #c.9504C>G,p.F3168L (LOH)                   | Exon 27 | No        |     |      |
|             | L5        | B3  | 3.5      | c.9504C>G,p.F3168L                        | Exon 27        | c.8935_8937delTTC, p.Phe2979del             | Exon 24 | Yes       | 30  | 0.27 |
|             | L6        | B4  | 5        | c.9504C>G,p.F3168L                        | Exon 27        | NT                                          |         | No        |     |      |
|             | L7        | B5  | 2        | c.9504C>G,p.F3168L                        | Exon 27        | c.5395C>T, p.Gln1799*                       | Exon 15 | Yes       | 41  | 0.34 |
|             | L10       | B6  | 3.5      | c.9504C>G,p.F3168L                        | Exon 27        | NT                                          |         | No        |     |      |
|             | R8        | A16 | 6        | c.9504C>G,p.F3168L                        | Exon 27        | c.2157del, p.His719Glnfs*66                 | Exon 11 | No        |     |      |
|             | R9        |     | 4        | c.9504C>G,p.F3168L                        | Exon 27        | c.1789del, p.Gln597Argfs*188                | Exon 9  | NT        |     |      |
|             |           |     |          |                                           | Exon 27        | c.4916dup, p.Gly1640Argfs*18                | Exon 15 |           |     |      |
|             | R10       |     | 3.5      | c.9504C>G,p.F3168L                        | Exon 27        | c.5180del, p.Pro1727Argfs*32                | Exon 15 | NT        |     |      |
|             | R13       | A17 | 3        | c.9504C>G,p.F3168L                        | Exon 27        | c.12711C>A, p.Tyr4237*                      | Exon 46 | Yes       | 39  | 0.28 |
|             | R14       | A18 | 2.5      | c.9504C>G,p.F3168L                        | Exon 27        | NT                                          |         | No        |     |      |
| CDS001574   | L2        | B7  | 4        | PKD1 c.10084del, p.Gln3362Serfs*35        | Exon 22        | c.10314_10315insGCT GGCA, p.Arg3439Alafs*34 | Exon 33 | Yes       | 157 | 0.22 |
| <i>PKD1</i> | L4        | B8  | 4        | PKD1 c.10084del, p.Gln3362Serfs*35        | Exon 22        | NT                                          | —       | No        |     |      |
|             | L6        | B9  | 2        | PKD1 c.10084del, p.Gln3362Serfs*35        | Exon 22        | NT                                          | —       | No        |     |      |
|             | *L9       | A20 | 1.5      | PKD1 c.10084del, p.Gln3362Serfs*35        | Exon 22        | c.348_352del, p.Asn116Lysfs*2               | Exon 3  | No        |     |      |
|             | R6        | A21 | 3        | PKD1 c.10084del, p.Gln3362Serfs*35        | Exon 22        | c.11887G>A, p.Trp3939*                      | Exon 43 | Yes       | 27  | 0.56 |
|             | R8        | B10 | 1.5      | PKD1 c.10084del, p.Gln3362Serfs*35        | Exon 22        | NT                                          | —       | No        |     |      |
|             | R9        |     | 2.5      | PKD1 c.10084del, p.Gln3362Serfs*35        | Exon 22        | c.11884_11912del, p.Gln3962Alafs*5          | Exon 43 | NT        |     |      |
|             | R10       | B12 | 2.5      | PKD1 c.10084del, p.Gln3362Serfs*35        | Exon 22        | c.10084del, p.Gln3362Serfs*35 (LOH)         | Exon 22 | Yes       |     |      |
| BJA001578   | L3        | B13 | 10       | c.3929_3930del, p.Asp1310Glyfs*120        | Exon 15        | c.6558_6568del, p.Trp2187Serfs*71           | Exon 15 | No        |     |      |
| <i>PKD1</i> | L4        | B14 | 4        | c.3929_3930del, p.Asp1310Glyfs*120        | Exon 15        | c.10948delC, p.His3650Thrfs*34              | Exon 37 | Yes       | 118 | 0.15 |
|             | L7        | B15 | 2        | c.3929_3930del, p.Asp1310Glyfs*120        | Exon 15        | NT                                          | —       | No        |     |      |
|             | L8        | B16 | 5        | c.3929_3930del, p.Asp1310Glyfs*120        | Exon 15        | c.10319del, p.Gly3440Alafs*33/ CNV*         | Exon 33 | No        |     |      |
|             | <b>R2</b> |     | <b>3</b> | <b>c.3929_3930del, p.Asp1310Glyfs*120</b> | <b>Exon 15</b> | <b>ND</b>                                   | —       | <b>NT</b> |     |      |
|             | R4        | A23 | 2        | c.3929_3930del, p.Asp1310Glyfs*120        | Exon 15        | c.1551_1560dup, p.Leu521*                   | Exon 7  | Yes       | 10  | 0.8  |
|             | R10       |     | 2.5      | c.3929_3930del, p.Asp1310Glyfs*120        | Exon 15        | c.412C>T, p.ArgR138*                        | Exon 4  | NT        |     |      |
|             | R11       | A24 | 3        | c.3929_3930del, p.Asp1310Glyfs*120        | Exon 15        | #c.3929_3930del, p.Asp1310Glyfs*120 (LOH)   | Exon 15 | Yes       | 12  | 1    |

|             |            |            |          |                                               |                |                                       |         |           |     |      |  |
|-------------|------------|------------|----------|-----------------------------------------------|----------------|---------------------------------------|---------|-----------|-----|------|--|
|             | <b>R13</b> | <b>A25</b> | <b>3</b> | <b>c.3929_3930del,<br/>p.Asp1310Glyfs*120</b> | <b>Exon 15</b> | <b>ND</b>                             |         | <b>No</b> |     |      |  |
|             | R16        |            | 3        | c.3929_3930del,<br>p.Asp1310Glyfs*120         | Exon 15        | c.12707T>A,<br>p.Val4236Asp           | Exon 46 | NT        |     |      |  |
| CMJ001593   | L1         | A27        | 10       | c.10406_10407insG,<br>p.Asp3469Glufs*2        | Exon 34        | NT                                    | —       | No        |     |      |  |
| <i>PKD1</i> | L2         | A28        | 4        | c.10406_10407insG,<br>p.Asp3469Glufs*2        | Exon 34        | c.6994_7000dup,<br>p.Val2334Glyfs*88  | Exon 16 | No        |     |      |  |
|             | *L3        | A29        | 4        | c.10406_10407insG,<br>p.Asp3469Glufs*2        | Exon 34        | c.6384C>A,<br>p.Asn2128Lys            | Exon 15 | No        |     |      |  |
|             | L10        | A30        | 3.5      | c.10406_10407insG,<br>p.Asp3469Glufs*2        | Exon 34        | c.10977del,<br>p.Glu3660Lysfs*24      | Exon 37 | Yes       | 58  | 0.22 |  |
|             | L11        | A31        | 3        | c.10406_10407insG,<br>p.Asp3469Glufs*2        | Exon 34        | c.8815G>T,<br>p.Glu2939*              | Exon 24 | Yes       | 46  | 0.22 |  |
|             | R1         | A32        | 8        | c.10406_10407insG,<br>p.Asp3469Glufs*2        | Exon 34        | NT                                    | —       | No        |     |      |  |
|             | R3         | A33        | 2        | c.10406_10407insG,<br>p.Asp3469Glufs*2        | Exon 34        | c.11887G>A,<br>p.Trp3939*             | Exon 43 | Yes       | 34  | 0.09 |  |
|             | R9         | A34        | 2        | c.10406_10407insG,<br>p.Asp3469Glufs*2        | Exon 34        | c.11887G>A,<br>p.Trp3939*             | Exon 43 | Yes       | 47  | 0.21 |  |
| RP9001591   | L2         | B18        | 3        | c.G10549T, p.E3517X                           | Exon 35        | c.8996_8997insG,<br>p.Phe2999Leufs*70 | Exon 25 | Yes       | 64  | 0.33 |  |
| <i>PKD1</i> | L9         | B19        | 3        | c.G10549T, p.E3517X                           | Exon 35        | NT                                    | —       | No        |     |      |  |
|             | L10        | B20        | 2        | c.G10549T, p.E3517X                           | Exon 35        | NT                                    | —       | No        |     |      |  |
|             | *L11       | B21        | 2.5      | c.G10549T, p.E3517X                           | Exon 35        | *c.G10549T,<br>p.Glu3517* (LOH)       | Exon 35 | Yes       | 140 | 0.97 |  |
|             | L15        | B22        | 1        | c.G10549T, p.E3517X                           | Exon 35        | NT                                    | —       | No        |     |      |  |
|             | R10        | B23        | 10       | c.G10549T: p.E3517X                           | Exon 35        | NT                                    | —       | No        |     |      |  |
|             | R17        | B24        | 7        | c.G10549T,<br>p.E3517X                        | Exon 35        | c.1005delC,<br>p.Val336Cysfs*129      | Exon 5  | Yes       | 38  | 0.21 |  |
| JS9001595   | L1         | B26        | 7        | c.6743_6744dup,<br>p.Val2249Metfs*2           | Exon 15        | NT                                    | —       | No        |     |      |  |
| <i>PKD1</i> | L4         | B27        | 7        | c.6743_6744dup,<br>p.Val2249Metfs*2           | Exon 15        | NT                                    | —       | No        |     |      |  |
|             | L8         | B28        | 3        | c.6743_6744dup,<br>p.Val2249Metfs*2           | Exon 15        | NT                                    | —       | No        |     |      |  |
|             | L9         | B29        | 1.5      | c.6743_6744dup,<br>p.Val2249Metfs*2           | Exon 15        | NT                                    | —       | No        |     |      |  |
|             | R1         | B30        | 5        | c.6743_6744dup,<br>p.Val2249Metfs*2           | Exon 15        | NT                                    | —       | No        |     |      |  |
|             | R2         | B31        | 4        | c.6743_6744dup,<br>p.Val2249Metfs*2           | Exon 15        | c.10220+2T>G (splice<br>donor site)   | IVS 5   | Yes       | 39  | 0.46 |  |
|             | R9         | B32        | 5        | c.6743_6744dup,<br>p.Val2249Metfs*2           | Exon 15        | NT                                    | —       | No        |     |      |  |
|             | R10        | B33        | 8        | c.6743_6744dup,<br>p.Val2249Metfs*2           | Exon 15        | c.3184C>T,<br>p.Gln1062*              | Exon 14 | Yes       | 27  | 0.63 |  |
| BH9002280   | L1         | B34        | 4        | c.923del,<br>p.Phe308Serfs*9                  | Exon 4         | c.2409delA,<br>p.Ser804Valfs*40       | Exon 13 | Yes       | 80  | 0.3  |  |
| <i>PKD2</i> | L2         | L2         | 5        | c.923del,<br>p.Phe308Serfs*9                  | Exon 4         | c.242 C>A, p.Ser81*                   | Exon 1  | Yes       | 14  | 0.57 |  |
|             | L5         | L5         | 7        | c.923del,<br>p.Phe308Serfs*9                  | Exon 4         | c.962 T>A, p.Ile321Lys                | Exon 4  | Yes       | 23  | 0.17 |  |
|             | L6         | B35        | 4        | c.923del,<br>p.Phe308Serfs*9                  | Exon 4         | c.1843G>A,<br>p.Ala615Thr             | Exon 8  | Yes       | 22  | 0.18 |  |
|             | L9         | B36        | 5        | c.923del,<br>p.Phe308Serfs*9                  | Exon 4         | c.1258A>T,<br>p.Arg420Trp             | Exon 5  | Yes       | 67  | 0.27 |  |

|    |    |     |                                       |               |                                |         |           |     |      |
|----|----|-----|---------------------------------------|---------------|--------------------------------|---------|-----------|-----|------|
| R1 | R1 | 6.5 | <b>c.923del ,<br/>p.Phe308Serfs*9</b> | <b>Exon 4</b> | <b>ND</b>                      | —       | <b>No</b> |     |      |
| R2 | R2 | 6.5 | c.923del ,<br>p.Phe308Serfs*9         | Exon 4        | +c.1392A>G, p.=                | Exon 6  | Yes       | 32  | 0.34 |
| R7 | R7 | 7   | c.923del ,<br>p.Phe308Serfs*9         | Exon 4        | c.1366 C>T, p.Gln456*          | Exon 6  | Yes       | 146 | 0.38 |
| R8 | R8 | 5   | c.923del ,<br>p.Phe308Serfs*9         | Exon 4        | c.2682del,<br>p.Gly895Valfs*14 | Exon 15 | Yes       | 55  | 0.11 |

\*Tested by LR-PCR Sequencing (Sanger/NGS); NT, not tested; ND, mutation not detected (highlighted in bold); L, Left kidney; R, Right kidney; Cyst diam, Cyst diameter

^LR-PCR NGS Coverage depth and VAF (patient PJ9001456). VAF, variant allele frequency.

#Flanking genomic regions show LOH (patients DR9001565, cyst L3/A15; BJA001578, cyst R11/A24; RP9001591 cyst L11/B21).

+Mutation (c.1392A>G, p.= ) predicted to create a new donor splice site using splice site prediction tools (ESEfinder, NNSplice and Human splicing finder 3.1) with default settings as the following:

5' splicing site donor of human (U2 type); threshold: 6.67  
Wt: score =0  
Mut: score =6.72

NNSplice:  
5' splicing site donor (score between: 0~1); threshold: 0.4  
Wt: score =0  
Mut: score =0.99

Human splicing finder (no threshold, but Ref score for both wt and mut sequence):  
Wt\_5' Motif Ref score= 1.02  
Mut\_5' Motif Ref score= 9.2

**Supplemental Table 4. WES analysis quality metrics (n=55)**

| Patient ID | Sample WES ID | Total Reads | Captured Reads | % Captured Reads | Average Coverage | Fraction Covered $\geq 10X$ |
|------------|---------------|-------------|----------------|------------------|------------------|-----------------------------|
| BS9001424  | A2            | 59288140    | 46647670       | 79               | 79               | 95                          |
|            | A3            | 60948808    | 51182719       | 84               | 81               | 95                          |
| PJ9001456  | A7            | 61112704    | 51516100       | 84               | 81               | 94                          |
|            | A8            | 64692576    | 52908950       | 82               | 86               | 95                          |
|            | A9            | 57059740    | 48152933       | 84               | 76               | 94                          |
|            | A10           | 56696466    | 48222269       | 85               | 77               | 94                          |
|            | A11           | 58105432    | 49809367       | 86               | 79               | 93                          |
|            | A12           | 53511126    | 44190577       | 83               | 73               | 93                          |
|            | B1            | 75218576    | 61014391       | 81               | 100              | 96                          |
|            | B2            | 69718392    | 56029475       | 80               | 92               | 96                          |
| DR9001565  | A14           | 58622018    | 50119702       | 86               | 79               | 93                          |
|            | A15           | 57994028    | 49533195       | 85               | 79               | 93                          |
|            | A16           | 58038740    | 48101321       | 83               | 78               | 93                          |
|            | A17           | 57663748    | 49069555       | 85               | 78               | 94                          |
|            | A18           | 55774588    | 45270235       | 81               | 75               | 94                          |
|            | B3            | 68230676    | 54114712       | 79               | 88               | 96                          |
|            | B4            | 72135280    | 58102834       | 81               | 95               | 96                          |
|            | B5            | 78874860    | 63768230       | 81               | 104              | 96                          |
| CDS001574  | B6            | 70553906    | 57460160       | 81               | 94               | 96                          |
|            | A20           | 55590492    | 46663285       | 84               | 74               | 94                          |
|            | A21           | 60246768    | 47784210       | 79               | 80               | 95                          |
|            | B7            | 72624574    | 58490167       | 81               | 95               | 96                          |
|            | B8            | 74513118    | 60092508       | 81               | 98               | 96                          |
|            | B9            | 68360776    | 57113523       | 84               | 91               | 96                          |
| BJA001578  | B10           | 69178470    | 56933333       | 82               | 92               | 96                          |
|            | B12           | 74641886    | 61432923       | 82               | 98               | 96                          |
|            | A23           | 59382594    | 49963127       | 84               | 79               | 94                          |
|            | A24           | 59782360    | 46468366       | 78               | 80               | 94                          |
|            | A25           | 57531320    | 48098903       | 84               | 76               | 94                          |
|            | B13           | 75934774    | 59548796       | 78               | 99               | 96                          |
|            | B14           | 68692792    | 52338655       | 76               | 88               | 95                          |
|            | B15           | 73866112    | 59247067       | 80               | 97               | 96                          |
| CMJ0001593 | B16           | 71212372    | 56576270       | 79               | 93               | 96                          |
|            | A27           | 60232948    | 50752932       | 84               | 80               | 95                          |
|            | A28           | 65011266    | 53044127       | 82               | 87               | 94                          |
|            | A29           | 69967054    | 54169683       | 77               | 92               | 95                          |

|           |         |          |          |      |      |      |
|-----------|---------|----------|----------|------|------|------|
|           | A30     | 66966870 | 54225024 | 81   | 89   | 95   |
|           | A31     | 64805090 | 52926697 | 82   | 86   | 94   |
|           | A32     | 71051458 | 59647035 | 84   | 95   | 95   |
|           | A33     | 66779892 | 55156803 | 83   | 89   | 94   |
|           | A34     | 67611950 | 56878603 | 84   | 91   | 95   |
|           | L2      | 62389122 | 50012518 | 80   | 81   | 95   |
|           | L5      | 68866436 | 57674420 | 84   | 90   | 95   |
|           | R1      | 66089250 | 55482615 | 84   | 87   | 95   |
|           | R2      | 65830676 | 53939148 | 82   | 85   | 95   |
| BH9002280 | R7      | 67064636 | 55703092 | 83   | 88   | 95   |
|           | R8      | 66508468 | 55034994 | 83   | 86   | 95   |
|           | B34     | 75648008 | 61277253 | 81   | 101  | 97   |
|           | B35     | 76221042 | 61680888 | 81   | 102  | 96   |
|           | B36     | 71463126 | 58499640 | 82   | 96   | 96   |
|           | B18     | 70125512 | 56105924 | 80   | 92   | 96   |
|           | B19     | 74910468 | 60072054 | 80   | 99   | 96   |
|           | B20     | 74945990 | 60396940 | 81   | 99   | 96   |
| RP9001591 | B21     | 73595282 | 59072274 | 80   | 97   | 96   |
|           | B22     | 76493664 | 62258955 | 81   | 102  | 96   |
|           | B23     | 72595400 | 58484269 | 81   | 96   | 96   |
|           | B24     | 72419496 | 58365628 | 81   | 96   | 96   |
|           | B26     | 74871118 | 60357216 | 81   | 99   | 96   |
|           | B27     | 75409158 | 62195918 | 82   | 100  | 96   |
|           | B28     | 75977794 | 61275216 | 81   | 100  | 96   |
|           | B29     | 59530170 | 45746169 | 77   | 79   | 95   |
| JS9001595 | B30     | 77272994 | 62133223 | 80   | 102  | 96   |
|           | B31     | 72114850 | 57032207 | 79   | 95   | 96   |
|           | B32     | 77055686 | 62202623 | 81   | 102  | 96   |
|           | B33     | 73808990 | 58468279 | 79   | 98   | 96   |
|           | Average | 67529724 | 55019045 | 81.6 | 89.5 | 95.2 |
|           | SD      | 6989380  | 5241790  | 2.2  | 8.9  | 1.0  |



**Supplemental Table 5.** Classification of somatic alterations (SNV/indels) detected by WES in cyst renal epithelia (N=65)

| Alteration type | Variant count |
|-----------------|---------------|
| Frameshift      | 58            |
| Nonsense        | 130           |
| Splice          | 59            |
| Inframe indel   | 59            |
| Missense        | 1942          |
| Synonymous      | 555           |
| UTR/Flank       | 119           |
| Intron/IGR      | 272           |
| RNA             | 69            |
| Total           | 3263          |

**Supplemental Table 6.** Pathogenic and likely pathogenic mutations by variant allele frequency

| Patient-ID | Cyst ID    | Missense<br>(5-19% VAF) | Missense<br>(20-29%<br>VAF) | Missense<br>(30-65%<br>VAF) | Truncate/<br>inframe<br>(5-19%<br>VAF) | Truncate/<br>inframe (20-<br>29% VAF) | Truncate/<br>inframe (30-<br>65% VAF) | Total |
|------------|------------|-------------------------|-----------------------------|-----------------------------|----------------------------------------|---------------------------------------|---------------------------------------|-------|
| BH9002280  | B34        | 17                      | 4                           |                             | 3                                      | 1                                     | 1                                     | 26    |
|            | B35        | 9                       | 4                           | 1                           |                                        |                                       |                                       | 14    |
|            | B36        | 14                      | 3                           | 1                           | 1                                      |                                       |                                       | 19    |
|            | L2         | 43                      | 1                           |                             | 5                                      |                                       | 1                                     | 50    |
|            | L5         | 25                      |                             | 1                           | 5                                      | 1                                     | 1                                     | 33    |
|            | R1         | 32                      | 3                           |                             | 6                                      |                                       |                                       | 41    |
|            | R2         | 47                      |                             |                             | 5                                      | 2                                     |                                       | 54    |
|            | R7         | 25                      | 2                           |                             | 7                                      | 1                                     |                                       | 35    |
|            | R8         | 35                      | 1                           |                             | 10                                     |                                       | 1                                     | 47    |
| BJA001578  | A23        | 7                       |                             | 1                           | 4                                      |                                       | 1                                     | 13    |
|            | A24        | 2                       |                             |                             |                                        |                                       |                                       | 2     |
|            | A25        | 2                       |                             |                             | 3                                      |                                       |                                       | 5     |
|            | B13        | 24                      | 3                           |                             | 3                                      |                                       | 1                                     | 31    |
|            | B14        | 27                      | 2                           | 1                           | 6                                      | 2                                     |                                       | 38    |
|            | B15        | 19                      | 3                           |                             | 2                                      |                                       | 2                                     | 26    |
|            | B16        | 7                       | 6                           | 2                           | 1                                      | 1                                     | 2                                     | 19    |
|            | BS9001424  | A2                      | 78                          | 2                           |                                        | 18                                    |                                       |       |
| A3         |            | 60                      | 2                           | 11                          | 5                                      |                                       | 9                                     | 87    |
| CDS001574  | A20        | 8                       |                             | 1                           |                                        | 1                                     |                                       | 10    |
|            | A21        | 12                      |                             |                             | 1                                      |                                       | 2                                     | 15    |
|            | B10        | 15                      | 4                           | 1                           | 1                                      | 2                                     | 2                                     | 25    |
|            | B12        | 22                      | 5                           |                             | 1                                      | 1                                     | 2                                     | 31    |
|            | B7         | 11                      | 5                           | 3                           | 2                                      | 5                                     |                                       | 26    |
|            | B8         | 15                      | 5                           | 1                           | 2                                      |                                       | 1                                     | 24    |
|            | B9         | 8                       | 1                           | 1                           | 3                                      | 3                                     | 1                                     | 17    |
|            | CMJ0001593 | A27                     | 6                           | 1                           |                                        | 1                                     |                                       |       |
| A28        |            | 35                      | 2                           |                             | 10                                     |                                       |                                       | 47    |
| A29        |            | 41                      |                             |                             | 5                                      |                                       |                                       | 46    |
| A30        |            | 34                      | 2                           | 2                           | 6                                      | 1                                     | 1                                     | 46    |
| A31        |            | 38                      | 2                           | 3                           | 6                                      | 2                                     |                                       | 51    |
| A32        |            | 47                      | 2                           |                             | 6                                      |                                       |                                       | 55    |
| A33        |            | 4                       |                             | 2                           | 5                                      | 1                                     |                                       | 12    |
| A34        |            | 36                      | 2                           | 1                           | 5                                      | 1                                     |                                       | 45    |
| DR9001565  |            | A14                     | 38                          |                             |                                        | 3                                     |                                       |       |
|            | A15        | 23                      | 2                           | 1                           | 4                                      | 1                                     |                                       | 31    |
|            | A16        | 11                      |                             |                             | 1                                      |                                       | 1                                     | 13    |
|            | A17        | 16                      |                             | 1                           | 2                                      | 2                                     | 1                                     | 22    |
|            | A18        | 37                      | 1                           |                             | 6                                      |                                       |                                       | 44    |
|            | B3         | 5                       | 1                           | 1                           |                                        |                                       |                                       | 7     |

|             |     |      |     |    |     |    |    |      |
|-------------|-----|------|-----|----|-----|----|----|------|
|             | B4  | 10   | 1   | 2  | 1   |    |    | 14   |
|             | B5  | 13   | 2   | 2  | 4   | 1  |    | 22   |
|             | B6  | 8    |     | 1  |     |    |    | 9    |
| JS9001595   | B26 | 7    |     | 1  | 3   |    |    | 11   |
|             | B27 | 9    | 1   | 2  |     |    | 1  | 13   |
|             | B28 | 14   | 4   |    |     |    |    | 18   |
|             | B29 | 4    | 1   | 1  | 2   |    |    | 8    |
|             | B30 | 8    | 1   |    | 2   | 1  |    | 12   |
|             | B31 | 7    | 1   |    |     |    | 2  | 10   |
|             | B32 | 17   | 1   |    | 2   |    | 2  | 22   |
|             | B33 | 15   | 2   | 1  | 1   |    | 1  | 20   |
| PJ9001456   | A10 | 31   | 2   |    | 7   |    | 1  | 41   |
|             | A11 | 29   |     | 1  | 4   |    | 1  | 35   |
|             | A12 | 22   | 4   |    | 2   | 1  | 1  | 30   |
|             | A7  | 9    |     | 1  | 5   | 1  | 1  | 17   |
|             | A8  | 46   | 3   |    | 7   | 1  |    | 57   |
|             | A9  | 48   | 1   |    | 16  |    | 2  | 67   |
|             | B1  | 6    | 1   | 3  | 2   |    | 1  | 13   |
|             | B2  | 19   | 1   | 2  | 2   | 2  | 1  | 27   |
| RP9001591   | B18 | 2    | 2   | 1  |     |    | 1  | 6    |
|             | B19 | 6    | 2   |    | 2   |    |    | 10   |
|             | B20 | 3    | 1   | 2  | 3   | 1  |    | 10   |
|             | B21 | 6    | 4   | 1  | 2   |    | 1  | 14   |
|             | B22 | 3    |     |    | 2   |    | 1  | 6    |
|             | B23 | 13   | 1   | 2  | 4   |    | 1  | 21   |
|             | B24 | 12   | 2   | 3  |     | 1  |    | 18   |
| Grand Total |     | 1302 | 109 | 62 | 227 | 37 | 48 | 1785 |

Total (VAF >5%)-1785

Missense-1473

Truncation/inframe indel-312

Total (VAF >20%)-248

Missesne- 175

Truncation/inframe indel- 73

**Supplemental Table 7.** Significantly pathogenic (truncation/indels) and probably pathogenic (CADD score $\geq$ 15) gene variations with VAF  $\geq$ 20% among the renal cyst samples

| Patient ID# | Cyst ID | Gene     | CHR   | Variant classification | HGVSc                    | HGVSp               | Variant coverage | VAF  | CADD score(PH RED) | Existing variation         |
|-------------|---------|----------|-------|------------------------|--------------------------|---------------------|------------------|------|--------------------|----------------------------|
| BJA001578   | A23     | PKD1     | chr16 | Frame_Shift_Ins        | c.1560_1561insTAACACCGAC | p.Leu521Ter         | 10               | 0.80 | NA                 |                            |
| BJA001578   | A23     | C4orf21  | chr4  | Missense_Mutation      | c.3919C>A                | p.His1307Asn        | 15               | 0.40 | 28.3               | COSM145050                 |
| BJA001578   | B13     | B3GNT3   | chr19 | In_Frame_Ins           | c.156_157insCCCCC        | p.Pro52_Pro53insPro | 28               | 0.61 | NA                 |                            |
| BJA001578   | B13     | ACTR3    | chr2  | Missense_Mutation      | c.433G>T                 | p.Ala145Ser         | 20               | 0.25 | 24.8               |                            |
| BJA001578   | B13     | ARID1A   | chr1  | Missense_Mutation      | c.920G>T                 | p.Gly307Val         | 8                | 0.25 | 22                 |                            |
| BJA001578   | B13     | FCHSD2   | chr11 | Missense_Mutation      | c.2158C>A                | p.Pro720Thr         | 26               | 0.23 | 29                 |                            |
| BJA001578   | B13     | LRCH1    | chr13 | Missense_Mutation      | c.711G>T                 | p.Lys237Asn         | 51               | 0.20 | 27.4               |                            |
| BJA001578   | B14     | STK19    | chr6  | Missense_Mutation      | c.328G>T                 | p.Asp110Tyr         | 42               | 0.31 | 19.46              |                            |
| BJA001578   | B14     | GSR      | chr8  | Splice_Site            | c.422+1G>T               |                     | 22               | 0.27 | 27.6               |                            |
| BJA001578   | B14     | TIAM2    | chr6  | Missense_Mutation      | c.494C>T                 | p.Thr165Met         | 76               | 0.25 | 24                 | rs375863554                |
| BJA001578   | B14     | HS2ST1   | chr1  | Nonsense_Mutation      | c.997C>T                 | p.Arg333Ter         | 9                | 0.22 | 40                 | COSM912858                 |
| BJA001578   | B14     | NMI      | chr2  | Missense_Mutation      | c.194C>A                 | p.Pro65His          | 9                | 0.22 | 28.4               |                            |
| BJA001578   | B15     | KDM6B    | chr17 | In_Frame_Del           | c.2253_2258delCACCAC     | p.Thr754_Thr755del  | 86               | 0.40 | NA                 | rs377654044<br>COSM985382  |
| BJA001578   | B15     | RAB30    | chr11 | Missense_Mutation      | c.203A>C                 | p.Gln68Pro          | 20               | 0.25 | 26.5               |                            |
| BJA001578   | B15     | ABTB1    | chr3  | Missense_Mutation      | c.112A>C                 | p.Thr38Pro          | 20               | 0.25 | 25.9               |                            |
| BJA001578   | B15     | NF1      | chr17 | Missense_Mutation      | c.3245G>T                | p.Gly1082Val        | 44               | 0.23 | 29                 |                            |
| BJA001578   | B16     | SMARCAD1 | chr4  | Missense_Mutation      | c.2572T>C                | p.Phe858Leu         | 66               | 0.48 | 23                 |                            |
| BJA001578   | B16     | PKD1     | chr16 | Missense_Mutation      | c.6485G>A                | p.Arg2162Gln        | 753              | 0.35 | 25.8               |                            |
| BJA001578   | B16     | KDM6B    | chr17 | In_Frame_Del           | c.2253_2258delCACCAC     | p.Thr754_Thr755del  | 76               | 0.33 | NA                 | rs377654044<br>COSM985382  |
| BJA001578   | B16     | IGSF9B   | chr11 | Missense_Mutation      | c.1427G>A                | p.Arg476His         | 87               | 0.28 | 28                 |                            |
| BJA001578   | B16     | GFPT1    | chr2  | Splice_Site            | c.1010-2A>C              |                     | 38               | 0.26 | 25.2               |                            |
| BJA001578   | B16     | GPR1     | chr2  | Missense_Mutation      | c.183G>T                 | p.Trp61Cys          | 8                | 0.25 | 29.4               |                            |
| BJA001578   | B16     | CST2     | chr20 | Missense_Mutation      | c.232G>T                 | p.Val78Leu          | 20               | 0.25 | 24.2               | rs141816898<br>COSM1202533 |
| BJA001578   | B16     | DNAH5    | chr5  | Missense_Mutation      | c.7009C>T                | p.Leu2337Phe        | 29               | 0.24 | 27.6               |                            |
| BJA001578   | B16     | EML3     | chr11 | Missense_Mutation      | c.2246A>C                | p.Glu749Ala         | 52               | 0.21 | 27.6               |                            |
| BJA001578   | B16     | NF1      | chr17 | Missense_Mutation      | c.3244G>T                | p.Gly1082Cys        | 29               | 0.21 | 29.8               |                            |

|           |     |         |       |                   |                                |                              |     |      |       |                           |
|-----------|-----|---------|-------|-------------------|--------------------------------|------------------------------|-----|------|-------|---------------------------|
| BS9001424 | A2  | NOX5    | chr15 | Missense_Mutation | c.844A>C                       | p.Ser282Arg                  | 24  | 0.29 | 23.9  | rs150003957<br>COSM964378 |
| BS9001424 | A2  | TIGD2   | chr4  | Missense_Mutation | c.653C>A                       | p.Thr218Lys                  | 14  | 0.21 | 25.2  |                           |
| BS9001424 | A3  | USP51   | chrX  | Frame_Shift_Del   | c.663_666delTGGG               | p.Ser221ArgfsTer22           | 32  | 0.59 | NA    | rs375319596               |
| BS9001424 | A3  | INSIG2  | chr2  | Missense_Mutation | c.83T>G                        | p.Leu28Trp                   | 61  | 0.57 | 26.5  |                           |
| BS9001424 | A3  | NAA15   | chr4  | Frame_Shift_Del   | c.175delA                      | p.Ile59SerfsTer34            | 48  | 0.56 | NA    | rs375319596               |
| BS9001424 | A3  | PKD1    | chr16 | Nonsense_Mutation | c.11888G>A                     | p.Trp3963Ter                 | 18  | 0.56 | 41    |                           |
| BS9001424 | A3  | C1orf74 | chr1  | Nonsense_Mutation | c.23C>A                        | p.Ser8Ter                    | 101 | 0.53 | 36    | rs375319596               |
| BS9001424 | A3  | BCOR    | chrX  | Missense_Mutation | c.4690A>G                      | p.Arg1564Gly                 | 76  | 0.51 | 31    |                           |
| BS9001424 | A3  | PSME4   | chr2  | In_Frame_Del      | c.4821_4832delCCCAGTGGAAA<br>A | p.Pro1608_Asn1611<br>del     | 20  | 0.50 | NA    | rs147962776               |
| BS9001424 | A3  | EMX2    | chr10 | Missense_Mutation | c.651A>T                       | p.Glu217Asp                  | 56  | 0.48 | 19.56 |                           |
| BS9001424 | A3  | ELP3    | chr8  | Splice_Site       | c.1486-1G>T                    |                              | 77  | 0.48 | 21.1  | rs147962776               |
| BS9001424 | A3  | WARS2   | chr1  | Missense_Mutation | c.404G>T                       | p.Arg135Leu                  | 46  | 0.48 | 35    |                           |
| BS9001424 | A3  | PAPD7   | chr5  | In_Frame_Del      | c.1371_1373delGTC              | p.Met457_Ser458de<br>linsIle | 204 | 0.48 | NA    | COSM201721                |
| BS9001424 | A3  | SIDT1   | chr3  | Missense_Mutation | c.2269G>A                      | p.Ala757Thr                  | 17  | 0.47 | 34    |                           |
| BS9001424 | A3  | RAB23   | chr6  | Missense_Mutation | c.398A>T                       | p.Asn133Ile                  | 110 | 0.46 | 22.8  | rs376167554               |
| BS9001424 | A3  | ITGA7   | chr12 | Missense_Mutation | c.386G>A                       | p.Arg129Gln                  | 91  | 0.46 | 19.41 |                           |
| BS9001424 | A3  | ZBTB40  | chr1  | Frame_Shift_Del   | c.435_436delAG                 | p.Gln145HisfsTer7            | 47  | 0.45 | NA    | rs150003957<br>COSM964378 |
| BS9001424 | A3  | DMXL1   | chr5  | Missense_Mutation | c.4099C>A                      | p.His1367Asn                 | 52  | 0.44 | 15.66 |                           |
| BS9001424 | A3  | CRYZ    | chr1  | Frame_Shift_Del   | c.411_414delTCGA               | p.Tyr137Ter                  | 143 | 0.40 | NA    | rs150003957<br>COSM964378 |
| BS9001424 | A3  | NCOR1   | chr17 | Missense_Mutation | c.5506G>A                      | p.Val1836Met                 | 66  | 0.39 | 24.9  |                           |
| BS9001424 | A3  | QRICH2  | chr17 | Missense_Mutation | c.4226C>T                      | p.Ala1409Val                 | 43  | 0.33 | 21.4  | rs150003957<br>COSM964378 |
| BS9001424 | A3  | NOX5    | chr15 | Missense_Mutation | c.844A>C                       | p.Ser282Arg                  | 25  | 0.32 | 23.9  |                           |
| BS9001424 | A3  | MTBP    | chr8  | Missense_Mutation | c.365G>T                       | p.Gly122Val                  | 13  | 0.23 | 16.47 | rs10663835<br>COSM307404  |
| BS9001424 | A3  | SIGIRR  | chr11 | Missense_Mutation | c.1082C>A                      | p.Pro361His                  | 49  | 0.22 | 24.8  |                           |
| CDS001574 | A20 | SPTY2D1 | chr11 | Missense_Mutation | c.2044C>G                      | p.Leu682Val                  | 46  | 0.30 | 20.8  | rs10663835<br>COSM307404  |
| CDS001574 | A20 | BCAR3   | chr1  | Nonsense_Mutation | c.895C>T                       | p.Arg299Ter                  | 10  | 0.20 | 38    |                           |
| CDS001574 | A21 | PKD1    | chr16 | Nonsense_Mutation | c.11817G>A                     | p.Trp3939Ter                 | 27  | 0.56 | 39    | rs10663835<br>COSM307404  |
| CDS001574 | A21 | CNDP1   | chr18 | In_Frame_Ins      | c.43_44insTGC                  | p.Val15_Leu16insLe<br>u      | 26  | 0.46 | NA    |                           |
| CDS001574 | B10 | TINAGL1 | chr1  | Missense_Mutation | c.961C>T                       | p.Arg321Cys                  | 64  | 0.38 | 34    | rs10663835<br>COSM307404  |
| CDS001574 | B10 | OXR1    | chr8  | Splice_Site       | c.1960-1G>T                    |                              | 17  | 0.29 | 26    |                           |

|           |     |         |       |                   |                         |                     |     |      |       |             |
|-----------|-----|---------|-------|-------------------|-------------------------|---------------------|-----|------|-------|-------------|
| CDS001574 | B10 | WDFY3   | chr4  | Missense_Mutation | c.2039A>C               | p.Gln680Pro         | 17  | 0.29 | 16.39 |             |
| CDS001574 | B10 | CFH     | chr1  | Missense_Mutation | c.3029C>T               | p.Ala1010Val        | 92  | 0.29 | 17.6  |             |
| CDS001574 | B10 | TRRAP   | chr7  | Missense_Mutation | c.2440C>G               | p.Pro814Ala         | 67  | 0.27 | 24.1  |             |
| CDS001574 | B10 | PPIL6   | chr6  | Nonsense_Mutation | c.244G>T                | p.Glu82Ter          | 19  | 0.26 | 37    |             |
| CDS001574 | B10 | DNAH5   | chr5  | Missense_Mutation | c.5340G>T               | p.Met1780Ile        | 29  | 0.21 | 16.41 |             |
| CDS001574 | B12 | SNX8    | chr7  | Nonsense_Mutation | c.910C>T                | p.Gln304Ter         | 66  | 0.44 | 36    |             |
| CDS001574 | B12 | AKT2    | chr19 | Missense_Mutation | c.1016T>G               | p.Val339Gly         | 14  | 0.29 | 27.1  |             |
| CDS001574 | B12 | INTS9   | chr8  | Missense_Mutation | c.269T>G                | p.Leu90Arg          | 33  | 0.24 | 27.4  |             |
| CDS001574 | B12 | RAB30   | chr11 | Missense_Mutation | c.203A>C                | p.Gln68Pro          | 25  | 0.24 | 26.5  |             |
| CDS001574 | B12 | SLC14A2 | chr18 | Missense_Mutation | c.2548A>C               | p.Asn850His         | 21  | 0.24 | 22.2  |             |
| CDS001574 | B12 | UPF2    | chr10 | Nonsense_Mutation | c.257C>A                | p.Ser86Ter          | 59  | 0.20 | 36    |             |
| CDS001574 | B12 | PCDHA13 | chr5  | Missense_Mutation | c.88C>A                 | p.Gln30Lys          | 10  | 0.20 | 23.7  |             |
| CDS001574 | B7  | WDFY3   | chr4  | Missense_Mutation | c.2039A>C               | p.Gln680Pro         | 13  | 0.38 | 16.39 |             |
| CDS001574 | B7  | SON     | chr21 | Missense_Mutation | c.331C>A                | p.His111Asn         | 32  | 0.38 | 23.3  |             |
| CDS001574 | B7  | AKT2    | chr19 | Missense_Mutation | c.1016T>G               | p.Val339Gly         | 13  | 0.31 | 27.1  |             |
| CDS001574 | B7  | CCDC180 | chr9  | Splice_Site       | c.1921-1G>A             |                     | 27  | 0.26 | 24.7  |             |
| CDS001574 | B7  | MMP8    | chr11 | Nonsense_Mutation | c.880G>T                | p.Glu294Ter         | 28  | 0.25 | 41    |             |
| CDS001574 | B7  | ALDH5A1 | chr6  | Missense_Mutation | c.815G>T                | p.Cys272Phe         | 20  | 0.25 | 27.3  |             |
| CDS001574 | B7  | CEP164  | chr11 | Frame_Shift_Del   | c.337delA               | p.Lys116ArgfsTer22  | 25  | 0.24 | NA    | rs75301270  |
| CDS001574 | B7  | GABRA6  | chr5  | Missense_Mutation | c.850A>C                | p.Thr284Pro         | 21  | 0.24 | 26.9  | COSM1351515 |
| CDS001574 | B7  | DROSHA  | chr5  | Missense_Mutation | c.3007A>C               | p.Ile1003Leu        | 17  | 0.24 | 23    | COSM1186750 |
| CDS001574 | B7  | INTS9   | chr8  | Missense_Mutation | c.269T>G                | p.Leu90Arg          | 31  | 0.23 | 27.4  |             |
| CDS001574 | B7  | PKD1    | chr16 | Frame_Shift_Ins   | c.10314_10315insGCTGGCA | p.Arg3439AlafsTer34 | 157 | 0.22 | NA    |             |
| CDS001574 | B7  | TFAM    | chr10 | Frame_Shift_Del   | c.432delA               | p.Glu148SerfsTer2   | 28  | 0.21 | NA    | rs78912196  |
| CDS001574 | B7  | DGAT2   | chr11 | Missense_Mutation | c.272T>G                | p.Leu91Arg          | 59  | 0.20 | 23.1  | COSM1348365 |
| CDS001574 | B8  | PRR12   | chr19 | Missense_Mutation | c.5284G>A               | p.Gly1762Arg        | 86  | 0.37 | 19.09 |             |
| CDS001574 | B8  | CST2    | chr20 | Missense_Mutation | c.232G>T                | p.Val78Leu          | 17  | 0.29 | 24.2  | rs141816898 |
| CDS001574 | B8  | SEC24D  | chr4  | Missense_Mutation | c.1735A>C               | p.Ile579Leu         | 31  | 0.26 | 20.9  | COSM1202533 |
| CDS001574 | B8  | SLC14A2 | chr18 | Missense_Mutation | c.2548A>C               | p.Asn850His         | 16  | 0.25 | 22.2  |             |
| CDS001574 | B8  | AMBRA1  | chr11 | Missense_Mutation | c.143A>C                | p.Glu48Ala          | 17  | 0.24 | 27    |             |
| CDS001574 | B8  | LRCH1   | chr13 | Missense_Mutation | c.706G>T                | p.Val236Leu         | 56  | 0.23 | 29.1  |             |
| CDS001574 | B8  | LRCH1   | chr13 | Missense_Mutation | c.705G>T                | p.Leu235Phe         | 56  | 0.20 | 28.5  |             |
| CDS001574 | B9  | LRCH1   | chr13 | Missense_Mutation | c.705G>T                | p.Leu235Phe         | 65  | 0.31 | 28.5  |             |
| CDS001574 | B9  | FAM155B | chrX  | In_Frame_Del      | c.54_56delCTG           | p.Cys20del          | 26  | 0.27 | NA    | rs374286243 |
| CDS001574 | B9  | NUP155  | chr5  | Missense_Mutation | c.1196C>A               | p.Ser399Tyr         | 14  | 0.21 | 29.6  | COSM1218072 |
| CDS001574 | B9  | TP53I11 | chr11 | Splice_Site       | c.335-2A>C              |                     | 34  | 0.21 | 24.7  |             |

|           |     |          |       |                   |                  |                         |     |      |       |                           |
|-----------|-----|----------|-------|-------------------|------------------|-------------------------|-----|------|-------|---------------------------|
| CMJ001593 | A27 | MEDAG    | chr13 | Missense_Mutation | c.68G>A          | p.Arg23His              | 15  | 0.27 | 28.5  | rs71436423<br>COSM432293  |
| CMJ001593 | A28 | BAI1     | chr8  | Missense_Mutation | c.1004G>T        | p.Arg335Leu             | 8   | 0.25 | 23    |                           |
| CMJ001593 | A28 | DNMT3A   | chr2  | Missense_Mutation | c.1439T>G        | p.Val480Gly             | 50  | 0.22 | 27.4  | rs200099128               |
| CMJ001593 | A30 | PARP14   | chr3  | Missense_Mutation | c.2768C>A        | p.Ser923Tyr             | 79  | 0.32 | 26    |                           |
| CMJ001593 | A30 | ZG16     | chr16 | Missense_Mutation | c.157C>T         | p.Arg53Trp              | 64  | 0.31 | 30    |                           |
| CMJ001593 | A30 | ANKK1    | chr11 | Nonsense_Mutation | c.754C>T         | p.Gln252Ter             | 52  | 0.31 | 26.8  |                           |
| CMJ001593 | A30 | ITGB1    | chr10 | Missense_Mutation | c.1667A>G        | p.Asp556Gly             | 104 | 0.25 | 32    |                           |
| CMJ001593 | A30 | PKDCC    | chr2  | Missense_Mutation | c.911C>T         | p.Thr304Met             | 92  | 0.23 | 23.4  | rs150069795               |
| CMJ001593 | A30 | PKD1     | chr16 | Frame_Shift_Del   | c.10980delA      | p.Ala3661ProfsTer2<br>3 | 58  | 0.22 | NA    |                           |
| CMJ001593 | A31 | PNISR    | chr6  | Missense_Mutation | c.1651T>C        | p.Ser551Pro             | 12  | 0.67 | 22.9  |                           |
| CMJ001593 | A31 | CCT4     | chr2  | Missense_Mutation | c.814A>T         | p.Met272Leu             | 27  | 0.56 | 25.9  |                           |
| CMJ001593 | A31 | EVI5     | chr1  | Missense_Mutation | c.1327A>T        | p.Ile443Phe             | 41  | 0.44 | 25.1  |                           |
| CMJ001593 | A31 | PTGER1   | chr19 | Missense_Mutation | c.571G>T         | p.Gly191Cys             | 8   | 0.25 | 26.7  |                           |
| CMJ001593 | A31 | PTGER1   | chr19 | Missense_Mutation | c.596G>T         | p.Arg199Leu             | 8   | 0.25 | 22.9  |                           |
| CMJ001593 | A31 | MN1      | chr22 | Nonsense_Mutation | c.3029G>A        | p.Trp1010Ter            | 36  | 0.22 | 39    |                           |
| CMJ001593 | A31 | PKD1     | chr16 | Nonsense_Mutation | c.8815G>T        | p.Glu2939Ter            | 46  | 0.22 | 39    |                           |
| CMJ001593 | A32 | MAGED2   | chrX  | Missense_Mutation | c.905G>T         | p.Arg302Leu             | 16  | 0.25 | 32    | COSM191867                |
| CMJ001593 | A32 | MCM4     | chr8  | Missense_Mutation | c.2019C>A        | p.Ser673Arg             | 10  | 0.20 | 20.9  |                           |
| CMJ001593 | A33 | MVP      | chr16 | Missense_Mutation | c.1807G>A        | p.Val603Ile             | 51  | 0.45 | 26    |                           |
| CMJ001593 | A33 | CWF19L2  | chr11 | Missense_Mutation | c.1880G>T        | p.Gly627Val             | 84  | 0.40 | 23    |                           |
| CMJ001593 | A33 | TSHZ1    | chr18 | Nonsense_Mutation | c.1564C>T        | p.Gln522Ter             | 70  | 0.29 | 36    |                           |
| CMJ001593 | A34 | SMARCAD1 | chr4  | Missense_Mutation | c.2572T>C        | p.Phe858Leu             | 22  | 0.41 | 23    |                           |
| CMJ001593 | A34 | DNMT3A   | chr2  | Missense_Mutation | c.1439T>G        | p.Val480Gly             | 42  | 0.24 | 27.4  | rs200099128               |
| CMJ001593 | A34 | PKD1     | chr16 | Nonsense_Mutation | c.11817G>A       | p.Trp3939Ter            | 47  | 0.21 | 39    |                           |
| CMJ001593 | A34 | TCP1     | chr6  | Missense_Mutation | c.269C>A         | p.Thr90Asn              | 15  | 0.20 | 27.7  |                           |
| DR9001565 | A15 | C1QL2    | chr2  | Missense_Mutation | c.590G>T         | p.Cys197Phe             | 10  | 0.30 | 31    |                           |
| DR9001565 | A15 | FER      | chr5  | Missense_Mutation | c.2248C>T        | p.Leu750Phe             | 24  | 0.29 | 31    |                           |
| DR9001565 | A15 | CEP164   | chr11 | Frame_Shift_Del   | c.337delA        | p.Lys116ArgfsTer22      | 58  | 0.21 | NA    | rs75301270<br>COSM1351515 |
| DR9001565 | A15 | WIZ      | chr19 | Missense_Mutation | c.1112G>T        | p.Arg371Leu             | 10  | 0.20 | 23.2  |                           |
| DR9001565 | A16 | THRAP3   | chr1  | Nonsense_Mutation | c.2701C>T        | p.Arg901Ter             | 9   | 0.33 | 41    |                           |
| DR9001565 | A17 | DOCK4    | chr7  | Frame_Shift_Del   | c.4286_4287delAA | p.Lys1429ArgfsTer3      | 124 | 0.39 | NA    |                           |
| DR9001565 | A17 | CASC5    | chr15 | Missense_Mutation | c.4886C>T        | p.Thr1629Ile            | 29  | 0.38 | 17.62 |                           |
| DR9001565 | A17 | PKD1     | chr16 | Nonsense_Mutation | c.12711C>A       | p.Tyr4237Ter            | 39  | 0.28 | 38    | CM003948                  |
| DR9001565 | A18 | PCDHGB6  | chr5  | Missense_Mutation | c.1415C>A        | p.Ala472Glu             | 14  | 0.29 | 20.8  |                           |
| DR9001565 | B3  | ACSS1    | chr20 | Missense_Mutation | c.500G>A         | p.Arg167His             | 12  | 0.42 | 31    |                           |
| DR9001565 | B3  | TIA1     | chr2  | Missense_Mutation | c.199A>C         | p.Asn67His              | 20  | 0.25 | 26.5  |                           |

|           |     |         |       |                   |               |                    |     |      |       |             |
|-----------|-----|---------|-------|-------------------|---------------|--------------------|-----|------|-------|-------------|
| DR9001565 | B4  | KIF17   | chr1  | Missense_Mutation | c.3002G>C     | p.Arg1001Pro       | 15  | 0.33 | 34    | COSM182818  |
| DR9001565 | B4  | PKD1    | chr16 | Missense_Mutation | c.6282G>T     | p.Trp2094Cys       | 9   | 0.33 | 26.8  |             |
| DR9001565 | B4  | SEC24D  | chr4  | Missense_Mutation | c.1787G>T     | p.Arg596Ile        | 36  | 0.25 | 34    |             |
| DR9001565 | B4  | KCNC3   | chr19 | 3'UTR             | c.*81A>C      |                    | 20  | 0.25 | 19.57 |             |
| DR9001565 | B5  | WRNIP1  | chr6  | Missense_Mutation | c.1120G>A     | p.Val374Met        | 80  | 0.33 | 32    |             |
| DR9001565 | B5  | PADI4   | chr1  | Missense_Mutation | c.979G>C      | p.Ala327Pro        | 69  | 0.30 | 23.8  | rs145819522 |
| DR9001565 | B5  | ODF3L2  | chr19 | Frame_Shift_Ins   | c.577_578insC | p.Arg193ProfsTer8  | 31  | 0.26 | NA    |             |
| DR9001565 | B5  | NOD2    | chr16 | Missense_Mutation | c.1057T>A     | p.Cys353Ser        | 13  | 0.23 | 16.44 |             |
| DR9001565 | B5  | RYR3    | chr15 | Missense_Mutation | c.9831A>T     | p.Arg3277Ser       | 73  | 0.22 | 27.2  |             |
| DR9001565 | B6  | UBE3C   | chr7  | Missense_Mutation | c.1332G>T     | p.Arg444Ser        | 16  | 0.31 | 23.2  |             |
| JS9001595 | B26 | LILRB5  | chr19 | Missense_Mutation | c.1652A>C     | p.Gln551Pro        | 17  | 0.35 | 16.26 |             |
| JS9001595 | B27 | ZNF518B | chr4  | Missense_Mutation | c.641A>C      | p.Glu214Ala        | 45  | 0.96 | 27.7  |             |
| JS9001595 | B27 | PNPLA6  | chr19 | Splice_Site       | c.2966+2T>G   |                    | 17  | 0.35 | 24.9  |             |
| JS9001595 | B27 | MYOM3   | chr1  | Missense_Mutation | c.3751A>C     | p.Lys1251Gln       | 20  | 0.30 | 23.2  |             |
| JS9001595 | B27 | POLR3E  | chr16 | Missense_Mutation | c.1459C>T     | p.Arg487Trp        | 166 | 0.20 | 17.53 |             |
| JS9001595 | B28 | EPG5    | chr18 | Missense_Mutation | c.1906T>G     | p.Tyr636Asp        | 36  | 0.28 | 26.3  |             |
| JS9001595 | B28 | XPNPEP2 | chrX  | Missense_Mutation | c.1100C>A     | p.Ala367Asp        | 11  | 0.27 | 18.56 |             |
| JS9001595 | B28 | SC5D    | chr11 | Missense_Mutation | c.439T>G      | p.Tyr147Asp        | 48  | 0.25 | 31    |             |
| JS9001595 | B28 | UBR7    | chr14 | Missense_Mutation | c.246T>G      | p.Cys82Trp         | 39  | 0.23 | 27.1  |             |
| JS9001595 | B29 | PCSK5   | chr9  | Missense_Mutation | c.1312G>T     | p.Val438Leu        | 13  | 0.31 | 26.8  |             |
| JS9001595 | B29 | PAPSS2  | chr10 | Missense_Mutation | c.377C>A      | p.Ala126Glu        | 20  | 0.20 | 15.35 |             |
| JS9001595 | B30 | CHD8    | chr14 | Missense_Mutation | c.1478G>A     | p.Arg493Gln        | 10  | 0.20 | 22.3  |             |
| JS9001595 | B31 | PKD1    | chr16 | Splice_Site       | c.10220+2T>G  |                    | 39  | 0.46 | 23.2  |             |
| JS9001595 | B31 | KCNC3   | chr19 | 3'UTR             | c.*81A>C      |                    | 16  | 0.44 | 19.57 |             |
| JS9001595 | B31 | POTEJ   | chr2  | Missense_Mutation | c.3103C>T     | p.Arg1035Cys       | 9   | 0.22 | 31    |             |
| JS9001595 | B32 | CRCP    | chr7  | Splice_Site       | c.145-1G>T    |                    | 19  | 0.32 | 23.7  |             |
| JS9001595 | B32 | TOX3    | chr16 | Missense_Mutation | c.1147A>G     | p.Ile383Val        | 289 | 0.23 | 20.8  |             |
| JS9001595 | B33 | PKD1    | chr16 | Nonsense_Mutation | c.3184C>T     | p.Gln1062Ter       | 27  | 0.63 | 35    |             |
| JS9001595 | B33 | ANGPTL3 | chr1  | Missense_Mutation | c.124G>C      | p.Asp42His         | 73  | 0.40 | 28.4  | rs199772471 |
| JS9001595 | B33 | LILRB5  | chr19 | Missense_Mutation | c.1652A>C     | p.Gln551Pro        | 17  | 0.29 | 16.26 |             |
| JS9001595 | B33 | PCSK5   | chr9  | Missense_Mutation | c.1312G>T     | p.Val438Leu        | 23  | 0.22 | 26.8  |             |
| BH9002280 | B34 | PKD2    | chr4  | Frame_Shift_Del   | c.2409delA    | p.Ser804ValfsTer40 | 80  | 0.30 | NA    |             |
| BH9002280 | B34 | MYT1    | chr20 | Silent            | c.2538G>A     | p.=                | 78  | 0.26 | 15.84 |             |
| BH9002280 | B34 | ZNF142  | chr2  | Missense_Mutation | c.4499G>A     | p.Arg1500Gln       | 9   | 0.22 | 35    | COSM214198  |
| BH9002280 | B34 | MKNK2   | chr19 | Missense_Mutation | c.434T>C      | p.Leu145Pro        | 36  | 0.22 | 27.5  |             |
| BH9002280 | B34 | PRUNE2  | chr9  | Missense_Mutation | c.9086G>T     | p.Ser3029Ile       | 29  | 0.21 | 32    |             |



|           |     |         |       |                   |                       |                                 |    |      |       |                            |
|-----------|-----|---------|-------|-------------------|-----------------------|---------------------------------|----|------|-------|----------------------------|
| BH9002280 | B34 | IGF1R   | chr15 | Missense_Mutation | c.311C>A              | p.Thr104Lys                     | 10 | 0.20 | 32    |                            |
| BH9002280 | B35 | CEP97   | chr3  | Missense_Mutation | c.1142A>T             | p.Asp381Val                     | 33 | 0.30 | 23.2  |                            |
| BH9002280 | B35 | MYBPC3  | chr11 | Missense_Mutation | c.917G>C              | p.Arg306Pro                     | 23 | 0.26 | 21    | rs373204728<br>COSM1475467 |
| BH9002280 | B35 | MYO18A  | chr17 | Missense_Mutation | c.3613C>T             | p.Arg1205Cys                    | 9  | 0.22 | 35    |                            |
| BH9002280 | B35 | PRRC2B  | chr9  | Missense_Mutation | c.1997A>C             | p.Gln666Pro                     | 27 | 0.22 | 25.6  |                            |
| BH9002280 | B35 | LAMP1   | chr13 | Missense_Mutation | c.430G>T              | p.Asp144Tyr                     | 40 | 0.20 | 26.1  |                            |
| BH9002280 | B36 | NXNL1   | chr19 | Missense_Mutation | c.577C>G              | p.Arg193Gly                     | 9  | 0.44 | 23.2  |                            |
| BH9002280 | B36 | PKD2    | chr4  | Missense_Mutation | c.1258A>T             | p.Arg420Trp                     | 67 | 0.27 | 27.7  | CM044694                   |
| BH9002280 | B36 | WDFY3   | chr4  | Missense_Mutation | c.2029A>C             | p.Asn677His                     | 16 | 0.25 | 24.3  |                            |
| BH9002280 | B36 | PIP5K1C | chr19 | Missense_Mutation | c.1144G>A             | p.Ala382Thr                     | 9  | 0.22 | 31    |                            |
| BH9002280 | L2  | PKD2    | chr4  | Nonsense_Mutation | c.242C>A              | p.Ser81Ter                      | 14 | 0.57 | 36    |                            |
| BH9002280 | L2  | DYNC2H1 | chr11 | Missense_Mutation | c.1412C>T             | p.Ser471Phe                     | 60 | 0.25 | 23.5  |                            |
| BH9002280 | L5  | PRKCI   | chr3  | Missense_Mutation | c.280G>C              | p.Glu94Gln                      | 35 | 0.34 | 24.3  |                            |
| BH9002280 | L5  | SCAF1   | chr19 | In_Frame_Ins      | c.619_620insCCCCCCCC  | p.Ser207_Pro208ins<br>ProProPro | 12 | 0.33 | NA    |                            |
| BH9002280 | L5  | MRM1    | chr17 | Splice_Site       | c.543-2A>G            |                                 | 62 | 0.29 | 24.7  |                            |
| BH9002280 | R1  | AK9     | chr6  | Missense_Mutation | c.2479G>A             | p.Glu827Lys                     | 80 | 0.23 | 35    |                            |
| BH9002280 | R1  | ZNF862  | chr7  | Missense_Mutation | c.1852G>A             | p.Val618Met                     | 68 | 0.22 | 17.02 |                            |
| BH9002280 | R1  | SNTB1   | chr8  | Missense_Mutation | c.937G>A              | p.Gly313Arg                     | 53 | 0.21 | 23.5  |                            |
| BH9002280 | R2  | PKD2    | chr4  | Silent            | c.11887G>A            | p.=                             | 32 | 0.34 | NA    |                            |
| BH9002280 | R2  | GRID2IP | chr7  | In_Frame_Del      | c.2259_2264delGCTCAG  | p.Leu754_Ser755de<br>l          | 29 | 0.24 | NA    |                            |
| BH9002280 | R2  | FAM46A  | chr6  | In_Frame_Del      | c.139_141delAGC       | p.Ser47del                      | 52 | 0.21 | NA    |                            |
| BH9002280 | R7  | PKD2    | chr4  | Nonsense_Mutation | c.1366C>T             | p.Gln456Ter                     | 98 | 0.38 | 42    |                            |
| BH9002280 | R7  | OR4C46  | chr11 | Missense_Mutation | c.493C>A              | p.Pro165Thr                     | 23 | 0.22 | 22.8  |                            |
| BH9002280 | R7  | FAM155B | chrX  | In_Frame_Del      | c.54_56delCTG         | p.Cys20del                      | 28 | 0.21 | NA    | rs374286243                |
| BH9002280 | R7  | KLK15   | chr19 | Missense_Mutation | c.245G>T              | p.Gly82Val                      | 14 | 0.21 | 26.4  | rs188149275                |
| BH9002280 | R8  | YBX3    | chr12 | In_Frame_Del      | c.40_42delACC         | p.Thr14del                      | 16 | 0.31 | NA    |                            |
| BH9002280 | R8  | SMC4    | chr3  | Missense_Mutation | c.2113C>T             | p.Arg705Cys                     | 13 | 0.23 | 26.4  |                            |
| PJ9001456 | A10 | PKD1    | chr16 | Frame_Shift_Del   | c.7655_7658 delinsTTG | p.Ala2552Valfs*68               |    | 0.32 |       |                            |
| PJ9001456 | A10 | XAF1    | chr17 | Missense_Mutation | c.614C>T              | p.Thr205Met                     | 56 | 0.27 | 16.55 | rs371250443                |
| PJ9001456 | A10 | KLHL35  | chr11 | Missense_Mutation | c.920G>T              | p.Gly307Val                     | 12 | 0.25 | 26.8  |                            |
| PJ9001456 | A11 | MIB2    | chr1  | Missense_Mutation | c.2092G>A             | p.Glu698Lys                     | 10 | 0.30 | 22.8  |                            |

|           |     |          |       |                   |                                             |                         |     |      |      |                           |
|-----------|-----|----------|-------|-------------------|---------------------------------------------|-------------------------|-----|------|------|---------------------------|
| PJ9001456 | A11 | PKD1     | chr16 | Frame_Shift_Del   | c.3745del                                   | p.Asp1249Thrfs*24       |     | 0.23 |      |                           |
| PJ9001456 | A12 | DNAH5    | chr5  | Missense_Mutation | c.10220G>T                                  | p.Cys3407Phe            | 13  | 0.23 | 25.1 |                           |
| PJ9001456 | A12 | CCDC28A  | chr6  | Missense_Mutation | c.338A>T                                    | p.Asn113Ile             | 159 | 0.22 | 26.3 |                           |
| PJ9001456 | A12 | FAM83B   | chr6  | Missense_Mutation | c.2386G>A                                   | p.Ala796Thr             | 38  | 0.21 | 23.4 |                           |
| PJ9001456 | A12 | SCN4A    | chr17 | Missense_Mutation | c.1244C>T                                   | p.Thr415Ile             | 53  | 0.21 | 21.3 | rs34914278                |
| PJ9001456 | A12 | EP400    | chr12 | Frame_Shift_Ins   | c.102_103insCCCCCCCCC                       | p.Ser37ProfsTer31       | 35  | 0.20 | NA   |                           |
| PJ9001456 | A7  | SVIL     | chr10 | Missense_Mutation | c.4121T>G                                   | p.Leu1374Arg            | 10  | 0.30 | 25.8 | rs199726033<br>COSM146919 |
| PJ9001456 | A7  | EP400    | chr12 | Frame_Shift_Ins   | c.102_103insCCCCCCCCC                       | p.Ser37ProfsTer31       | 40  | 0.20 | NA   |                           |
| PJ9001456 | A8  | PKD1     | chr16 | Frame_Shift_Del   | c.348_352del                                | p.Asn116Lysfs*2         |     | 0.29 |      |                           |
| PJ9001456 | A8  | DHX38    | chr16 | Splice_Site       | c.3477+2T>G                                 |                         | 18  | 0.28 | 25.8 | COSM304954                |
| PJ9001456 | A8  | ZBTB38   | chr3  | Missense_Mutation | c.62C>A                                     | p.Ser21Tyr              | 13  | 0.23 | 25.8 |                           |
| PJ9001456 | A8  | TCP1     | chr6  | Missense_Mutation | c.847G>A                                    | p.Ala283Thr             | 56  | 0.21 | 25.8 |                           |
| PJ9001456 | A8  | PLCH2    | chr1  | Missense_Mutation | c.170G>T                                    | p.Arg57Leu              | 15  | 0.20 | 26.8 | rs371340812<br>COSM381226 |
| PJ9001456 | A8  | FAM83A   | chr8  | Missense_Mutation | c.619A>G                                    | p.Lys207Glu             | 87  | 0.20 | 23.9 |                           |
| PJ9001456 | A9  | PKD1     | chr16 | Splice_Site       | c.8016+1delG                                |                         | 12  | 0.50 | NA   |                           |
| PJ9001456 | A9  | TMPRSS6  | chr22 | Missense_Mutation | c.1477G>T                                   | p.Ala493Ser             | 15  | 0.20 | 23   |                           |
| PJ9001456 | B1  | URGCP    | chr7  | Missense_Mutation | c.173A>C                                    | p.Asn58Thr              | 14  | 0.36 | 26.9 |                           |
| PJ9001456 | B1  | DNAH5    | chr5  | Missense_Mutation | c.5335G>T                                   | p.Val1779Phe            | 28  | 0.32 | 27.9 |                           |
| PJ9001456 | B1  | SLC14A2  | chr18 | Missense_Mutation | c.2548A>C                                   | p.Asn850His             | 19  | 0.32 | 22.2 |                           |
| PJ9001456 | B1  | ADAMTS14 | chr10 | Missense_Mutation | c.1231C>A                                   | p.His411Asn             | 83  | 0.25 | 28.6 |                           |
| PJ9001456 | B2  | EIF3A    | chr10 | Missense_Mutation | c.330G>T                                    | p.Gln110His             | 33  | 0.36 | 23.5 |                           |
| PJ9001456 | B2  | RGS1     | chr1  | Missense_Mutation | c.553G>T                                    | p.Asp185Tyr             | 59  | 0.32 | 33   |                           |
| PJ9001456 | B2  | DNAH5    | chr5  | Missense_Mutation | c.5335G>T                                   | p.Val1779Phe            | 23  | 0.26 | 27.9 |                           |
| PJ9001456 | B2  | NKD2     | chr5  | In_Frame_Del      | c.1315_1317delCAC                           | p.His439del             | 26  | 0.23 | NA   | COSM1291992               |
| PJ9001456 | B2  | PKD1     | chr16 | Splice_Site       | c.12004-<br>2_12019delAGGCTGCCAGCA<br>GCTAC |                         | 193 | 0.23 | NA   |                           |
| PJ9001456 | B2  | SRCIN1   | chr17 | Missense_Mutation | c.3298A>C                                   | p.Lys1100Gln            | 41  | 0.20 | 26.4 |                           |
| RP9001591 | B18 | PKD1     | chr16 | Frame_Shift_Ins   | c.8996_8997insG                             | p.Phe2999LeufsTer<br>70 | 64  | 0.33 | NA   |                           |
| RP9001591 | B18 | ATP2B3   | chrX  | Missense_Mutation | c.2866G>A                                   | p.Gly956Arg             | 92  | 0.30 | 27   |                           |

|           |     |          |       |                   |                       |                    |     |      |       |             |
|-----------|-----|----------|-------|-------------------|-----------------------|--------------------|-----|------|-------|-------------|
| RP9001591 | B18 | KIF13A   | chr6  | Missense_Mutation | c.3918A>C             | p.Glu1306Asp       | 22  | 0.23 | 24.4  |             |
| RP9001591 | B18 | TNRC6B   | chr22 | Missense_Mutation | c.265C>T              | p.Arg89Trp         | 10  | 0.20 | 34    |             |
| RP9001591 | B19 | EEF1D    | chr8  | Missense_Mutation | c.73C>T               | p.Arg25Trp         | 10  | 0.20 | 30    |             |
| RP9001591 | B19 | MYOM3    | chr1  | Missense_Mutation | c.3751A>C             | p.Lys1251Gln       | 20  | 0.20 | 23.2  |             |
| RP9001591 | B20 | CACNA2D1 | chr7  | Missense_Mutation | c.668G>T              | p.Trp223Leu        | 12  | 0.42 | 35    | COSM747982  |
| RP9001591 | B20 | PRRC2B   | chr9  | Missense_Mutation | c.1997A>C             | p.Gln666Pro        | 11  | 0.36 | 25.6  |             |
| RP9001591 | B20 | PRLR     | chr5  | Nonsense_Mutation | c.713G>A              | p.Trp238Ter        | 14  | 0.29 | 38    |             |
| RP9001591 | B20 | KIF13A   | chr6  | Missense_Mutation | c.3918A>C             | p.Glu1306Asp       | 21  | 0.24 | 24.4  |             |
| RP9001591 | B21 | KIF26A   | chr14 | Missense_Mutation | c.5624C>T             | p.Pro1875Leu       | 75  | 0.39 | 22    | rs200461988 |
| RP9001591 | B21 | KISS1R   | chr19 | Frame_Shift_Del   | c.828_832delGGGCC     | p.Trp276CysfsTer28 | 72  | 0.35 | NA    |             |
| RP9001591 | B21 | ACIN1    | chr14 | Missense_Mutation | c.3499C>T             | p.Arg1167Trp       | 8   | 0.25 | 34    |             |
| RP9001591 | B21 | PSAT1    | chr9  | Missense_Mutation | c.160A>C              | p.Asn54His         | 76  | 0.22 | 21.4  |             |
| RP9001591 | B21 | ABCA13   | chr7  | Missense_Mutation | c.86A>C               | p.Glu29Ala         | 18  | 0.22 | 31    |             |
| RP9001591 | B21 | GPR20    | chr8  | Missense_Mutation | c.709G>A              | p.Val237Met        | 18  | 0.22 | 19.88 |             |
| RP9001591 | B22 | SMARCA2  | chr9  | In_Frame_Del      | c.667_675delCAGCAGCAG | p.Gln226_Gln228del | 111 | 0.36 | NA    |             |
| RP9001591 | B23 | ATAD2B   | chr2  | Frame_Shift_Del   | c.458_465delATGGGGAC  | p.Asp153AlafsTer7  | 29  | 0.52 | NA    |             |
| RP9001591 | B23 | SELE     | chr1  | Missense_Mutation | c.922C>T              | p.Arg308Cys        | 76  | 0.41 | 23    |             |
| RP9001591 | B23 | STON2    | chr14 | Missense_Mutation | c.1498C>T             | p.Arg500Trp        | 22  | 0.36 | 29.3  | rs149119701 |
| RP9001591 | B23 | NSMAF    | chr8  | Missense_Mutation | c.1268A>T             | p.Tyr423Phe        | 19  | 0.21 | 29.7  |             |
| RP9001591 | B24 | KIF17    | chr1  | Missense_Mutation | c.3002G>C             | p.Arg1001Pro       | 16  | 0.38 | 34    | COSM182818  |
| RP9001591 | B24 | ABCA13   | chr7  | Missense_Mutation | c.86A>C               | p.Glu29Ala         | 11  | 0.36 | 31    |             |
| RP9001591 | B24 | PRRC2B   | chr9  | Missense_Mutation | c.1997A>C             | p.Gln666Pro        | 16  | 0.31 | 25.6  |             |
| RP9001591 | B24 | RSPRY1   | chr16 | Missense_Mutation | c.703A>C              | p.Lys235Gln        | 25  | 0.24 | 15.76 |             |
| RP9001591 | B24 | PKD1     | chr16 | Frame_Shift_Del   | c.1005delC            | p.Val336CysfsTer12 | 38  | 0.21 | NA    |             |
| RP9001591 | B24 | COL9A3   | chr20 | Missense_Mutation | c.467C>A              | p.Pro156His        | 10  | 0.20 | 24.9  |             |

The pathogenic potential of missense variants was evaluated using the computational analysis tool Combined Annotation-Dependent Depletion (CADD), which enables scoring of deleteriousness of SNVs and indels. A CADD value of  $\geq 15$  suggests the variant is likely pathogenic (<http://cadd.gs.washington.edu/>).

**Supplemental Table 8.** List of genes associated with ciliopathy disorders (N=211)

|       |       |       |         |          |        |
|-------|-------|-------|---------|----------|--------|
| CEP41 | BBS5  | HYDIN | CE104   | CLRN1    | DNAAF1 |
| DNAL1 | CC28B | CE41B | TM231   | LEFTY2   | TOPORS |
| ALMS1 | DDX59 | DYH11 | CCD65   | CRX      | NODAL  |
| WDR35 | WDR60 | TM216 | CU002   | TSC2     | GDF1   |
| TTC8  | ZMY10 | DRC1  | C2D2A   | TCTN2    | PACS1  |
| BBS4  | DYHC2 | LBN   | TM138   | NPHP5    | TTC21B |
| BBS2  | FRITZ | FTM   | DYXC1   | DYNC2H1  | CEP164 |
| MKS1  | F161A | IF172 | IFT27   | BBS9     | EVC2   |
| B9D1  | DAAF1 | DYH5  | C5orf42 | ATXN10   | 7SEP   |
| KIF7  | CCNO  | UROM  | TMEM216 | ZNF423   | TMEM67 |
| DNAI1 | CE41A | CCD39 | GPR98   | XPNPEP3  | PCDH15 |
| NEK8  | TRI32 | CU059 | SCNN1B  | SCNN1A   |        |
| NPHP4 | BBIP1 | SDCG8 | ACVR2B  | WDPCP    |        |
| WDR19 | PDE6D | CC151 | INPP5E  | TMEM138  |        |
| INVS  | SPAG1 | IF140 | RPE65   | RD3      |        |
| EVC   | RSH4A | RPGR1 | SCNN1G  | CEP290   |        |
| IFT43 | POC1A | XPP3  | MYO7A   | TCTN1    |        |
| PKD1  | CC103 | TT21B | ARL13B  | CRELD1   |        |
| RSPH9 | CE290 | CC114 | LCA5    | CRB1     |        |
| OFD1  | AR2BP | OCRL  | AIPL1   | USH1G    |        |
| DNAI2 | MRE11 | TM237 | C2orf71 | TMEM231  |        |
| GLIS2 | CE042 | ANKS6 | NME8    | TSC1     |        |
| BBS1  | TALD3 | TILB  | NKX2-5  | IMPDH1   |        |
| IQCB1 | K0556 | ARMC4 | DFNB31  | FOXH1    |        |
| BBS10 | TMM17 | TXND3 | CDH23   | TULP1    |        |
| PKD2  | AR13B | LZTL1 | RDH12   | TRIM32   |        |
| HYLS1 | RSPH1 | MCIN  | CCDC40  | USH1C    |        |
| RPGR  | CE164 | IF122 | DNAH11  | SPATA7   |        |
| PKHD1 | KTU   | CEP83 | RSPH4A  | DNAH5    |        |
| BBS12 | CE120 | DAAF3 | PTCH1   | RPGRIP1  |        |
| NPHP3 | DAAF5 | ATX10 | KIF3A   | IFT88    |        |
| IFT80 | CB071 | PTHB1 | LRAT    | USH2A    |        |
| B9D2  | TECT1 | TAPT1 | ZIC3    | CCDC39   |        |
| NEK1  | DCDC2 | CENPF | CCDC28B | KIF3B    |        |
| NPHP1 | TECT3 | INP5E | TMEM237 | GUCY2D   |        |
| MKKS  | CCD40 | C2CD3 | UMOD    | CFTR     |        |
| AHI1  | CSPP1 | KIF14 | BRCC3   | VHL      |        |
| BBS7  | RSPH3 | TECT2 | CC2D2A  | RPGRIP1L |        |
| MKS3  | WDR34 | GAS8  | DNAAF2  | KCNJ13   |        |
| ARL6  | MIPT3 | ZN423 | SDCCAG8 | DNAAF3   |        |

**Supplemental Table 9.** Gene variations in principal ciliopathy genes

| Patient ID | Cyst ID | Gene    | Chr   | HGVSc       | HGVSp              | Total coverage | ALT VAF | dbSNP rs/COSMIC           | CADD Score (PHRED) |
|------------|---------|---------|-------|-------------|--------------------|----------------|---------|---------------------------|--------------------|
| JS9001595  | B28     | AHI1    | chr6  | c.1210A>C   | p.Met404Leu        | 39             | 0.15    |                           | 20.7               |
| CMJ0001593 | A34     | BRCC3   | chrX  | c.286C>A    | p.Gln96Lys         | 74             | 0.05    |                           | 24.3               |
| DR9001565  | A17     | C5orf42 | chr5  | c.8960C>A   | p.Pro2987Gln       | 48             | 0.06    |                           | 23.4               |
| JS9001595  | B26     | CC2D2A  | chr4  | c.4735T>G   | p.Tyr1579Asp       | 65             | 0.14    |                           | 23.2               |
| JS9001595  | B27     | CC2D2A  | chr4  | c.4735T>G   | p.Tyr1579Asp       | 55             | 0.15    |                           | 23.2               |
| JS9001595  | B29     | CC2D2A  | chr4  | c.4735T>G   | p.Tyr1579Asp       | 49             | 0.14    |                           | 23.2               |
| JS9001595  | B30     | CC2D2A  | chr4  | c.4735T>G   | p.Tyr1579Asp       | 74             | 0.15    |                           | 23.2               |
| JS9001595  | B31     | CC2D2A  | chr4  | c.4735T>G   | p.Tyr1579Asp       | 54             | 0.11    |                           | 23.2               |
| JS9001595  | B32     | CC2D2A  | chr4  | c.4735T>G   | p.Tyr1579Asp       | 75             | 0.15    |                           | 23.2               |
| JS9001595  | B33     | CC2D2A  | chr4  | c.4735T>G   | p.Tyr1579Asp       | 73             | 0.12    |                           | 23.2               |
| DR9001565  | A18     | CCDC28B | chr1  | c.562C>A    | p.Leu188Met        | 77             | 0.05    |                           | 28.7               |
| DR9001565  | A15     | CEP164  | chr11 | c.337delA   | p.Lys116ArgfsTer22 | 58             | 0.21    | rs75301270<br>COSM1351515 |                    |
| CDS001574  | B7      | CEP164  | chr11 | c.337delA   | p.Lys116ArgfsTer22 | 25             | 0.24    | rs75301270<br>COSM1351515 |                    |
| PJ9001456  | A10     | CRX     | chr19 | c.202G>T    | p.Ala68Ser         | 47             | 0.06    |                           | 24.4               |
| PJ9001456  | A7      | CSPP1   | chr8  | c.853C>A    | p.Pro285Thr        | 28             | 0.11    |                           | 22.5               |
| PJ9001456  | A10     | DNAH11  | chr7  | c.3976C>A   | p.Leu1326Ile       | 24             | 0.13    | COSM1088396               | 26                 |
| PJ9001456  | A12     | DNAH5   | chr5  | c.10220G>T  | p.Cys3407Phe       | 13             | 0.23    |                           | 25.1               |
| PJ9001456  | B1      | DNAH5   | chr5  | c.5335G>T   | p.Val1779Phe       | 28             | 0.32    |                           | 27.9               |
| PJ9001456  | B1      | DNAH5   | chr5  | c.5335G>T   | p.Val1779Phe       | 28             | 0.32    |                           | 27.9               |
| CDS001574  | B10     | DNAH5   | chr5  | c.5340G>T   | p.Met1780Ile       | 29             | 0.21    |                           | 16.41              |
| BJA001578  | B16     | DNAH5   | chr5  | c.7009C>T   | p.Leu2337Phe       | 29             | 0.24    |                           | 27.6               |
| PJ9001456  | B2      | DNAH5   | chr5  | c.5335G>T   | p.Val1779Phe       | 23             | 0.26    |                           | 27.9               |
| BH9002280  | R8      | DNAH5   | chr5  | c.12795C>A  | p.Asn4265Lys       | 28             | 0.11    |                           | 25.1               |
| BH9002280  | L2      | DYNC2H1 | chr11 | c.1412C>T   | p.Ser471Phe        | 60             | 0.25    |                           | 23.5               |
| PJ9001456  | A9      | GPR98   | chr5  | c.14135C>A  | p.Ala4712Asp       | 28             | 0.11    |                           | 28.6               |
| DR9001565  | A14     | IFT88   | chr13 | c.1519G>T   | p.Gly507Cys        | 26             | 0.12    |                           | 31                 |
| PJ9001456  | A8      | KIF14   | chr1  | c.2604G>T   | p.Lys868Asn        | 46             | 0.07    |                           | 25.1               |
| BS9001424  | A2      | LEFTY2  | chr1  | c.37C>A     | p.Leu13Met         | 30             | 0.1     |                           | 17.59              |
| BS9001424  | A2      | NODAL   | chr10 | c.1006C>A   | p.His336Asn        | 39             | 0.08    | COSM1675318               | 28.1               |
| PJ9001456  | A10     | PACS1   | chr11 | c.753C>A    | p.Tyr251Ter        | 43             | 0.07    |                           | 35                 |
| PJ9001456  | A9      | PCDH15  | chr10 | c.4916C>A   | p.Thr1639Lys       | 40             | 0.1     | COSM364266                | 20.5               |
| PJ9001456  | A9      | 7SEP    | chr7  | c.113C>A    | p.Pro38Gln         | 46             | 0.07    |                           | 31                 |
| CMJ0001593 | A29     | 7SEP    | chr7  | c.832G>T    | p.Gly278Cys        | 49             | 0.06    |                           | 25.6               |
| BH9002280  | R2      | TMEM67  | chr8  | c.1862C>A   | p.Ala621Glu        | 33             | 0.09    |                           | 29.6               |
| DR9001565  | A18     | TSC1    | chr9  | c.2148C>A   | p.Asn716Lys        | 48             | 0.06    |                           | 29.3               |
| DR9001565  | A15     | TSC2    | chr16 | c.5010C>A   | p.His1670Gln       | 36             | 0.08    | rs376306544               | 22.3               |
| BS9001424  | A3      | TTC8    | chr14 | c.1224+1G>T |                    | 48             | 0.06    |                           | 26.1               |
| CMJ0001593 | A34     | UMOD    | chr16 | c.757G>T    | p.Gly253Cys        | 36             | 0.08    |                           | 34                 |
| CMJ0001593 | A29     | USH2A   | chr1  | c.9752G>T   | p.Cys3251Phe       | 62             | 0.06    |                           | 34                 |
| CMJ0001593 | A27     | WDR19   | chr4  | c.2659G>T   | p.Asp887Tyr        | 27             | 0.11    |                           | 25.8               |
| BH9002280  | R1      | WDR19   | chr4  | c.784G>T    | p.Gly262Ter        | 41             | 0.07    |                           | 34                 |
| BH9002280  | L2      | WDR34   | chr9  | c.670G>T    | p.Ala224Ser        | 73             | 0.05    |                           | 19.47              |
| PJ9001456  | A10     | ZIC3    | chrX  | c.737C>A    | p.Pro246His        | 41             | 0.07    |                           | 26.4               |

**Supplemental Table 10.** Gene variations in principal cancer genes

| Patient ID | Cyst ID | Gene   | Chr   | HGVSc             | HGVSp        | Total Cov | ALT VAF | dbSNP ID/COSMIC            | CADD Score (PHRED) |
|------------|---------|--------|-------|-------------------|--------------|-----------|---------|----------------------------|--------------------|
| BH9002280  | R2      | ABL1   | chr9  | c.1870_1872delAAG | p.Lys624del  | 100       | 0.07    | rs201725154<br>COSM1645213 |                    |
| PJ9001456  | A8      | AFF4   | chr5  | c.2519C>A         | p.Ser840Tyr  | 46        | 0.07    |                            | 24.4               |
| CMJ0001593 | A32     | AKAP9  | chr7  | c.6631C>A         | p.Gln2211Lys | 22        | 0.18    |                            | 27                 |
| CDS001574  | B12     | AKT2   | chr19 | c.1016T>G         | p.Val339Gly  | 14        | 0.29    |                            | 27.1               |
| CDS001574  | B7      | AKT2   | chr19 | c.1016T>G         | p.Val339Gly  | 13        | 0.31    |                            | 27.1               |
| CMJ0001593 | A34     | ALDH2  | chr12 | c.541C>A          | p.Gln181Lys  | 44        | 0.07    |                            | 33                 |
| BJA001578  | B13     | ARID1A | chr1  | c.920G>T          | p.Gly307Val  | 8         | 0.25    |                            | 22                 |
| BJA001578  | B13     | ARID2  | chr12 | c.4673C>A         | p.Ala1558Glu | 18        | 0.17    |                            | 27.5               |
| RP9001591  | B18     | ATP2B3 | chrX  | c.2866G>A         | p.Gly956Arg  | 92        | 0.3     |                            | 27                 |
| BS9001424  | A2      | BCL3   | chr19 | c.783G>T          | p.Leu261Phe  | 37        | 0.08    |                            | 23.1               |
| BS9001424  | A2      | BCOR   | chrX  | c.4572C>A         | p.Asn1524Lys | 42        | 0.07    |                            | 32                 |
| BS9001424  | A3      | BCOR   | chrX  | c.4690A>G         | p.Arg1564Gly | 76        | 0.51    |                            | 31                 |
| BS9001424  | A2      | BRD4   | chr19 | c.3650C>A         | p.Ala1217Asp | 34        | 0.09    |                            | 23.9               |
| DR9001565  | B5      | CANT1  | chr17 | c.1060G>A         | p.Asp354Asn  | 50        | 0.06    |                            | 22.3               |
| JS9001595  | B27     | CARD11 | chr7  | c.922G>A          | p.Asp308Asn  | 33        | 0.09    |                            | 35                 |
| BS9001424  | A2      | CARS   | chr11 | c.1396-1C>T       |              | 32        | 0.09    | COSM926250                 | 25.8               |
| DR9001565  | A17     | CASC5  | chr15 | c.4886C>T         | p.Thr1629Ile | 29        | 0.38    |                            | 17.62              |
| CMJ0001593 | A31     | CASC5  | chr15 | c.5858G>T         | p.Arg1953Leu | 52        | 0.08    | COSM1372707                | 14.46              |
| CDS001574  | B12     | CHEK2  | chr22 | c.-3C>T           |              | 32        | 0.16    |                            | 19.31              |
| BJA001578  | B15     | CLTCL1 | chr22 | c.3533C>A         | p.Ala1178Asp | 72        | 0.06    |                            | 29.6               |
| CDS001574  | B12     | COL1A1 | chr17 | c.3783C>A         | p.Asp1261Glu | 46        | 0.07    |                            | 23.8               |
| BS9001424  | A2      | CREBBP | chr16 | c.6340G>T         | p.Gly2114Cys | 36        | 0.08    | rs139169188                | 14.95              |
| BH9002280  | L5      | CRTC1  | chr19 | c.1899C>A         | p.Asp633Glu  | 47        | 0.06    |                            | 28.8               |
| CMJ0001593 | A28     | DNMT3A | chr2  | c.1439T>G         | p.Val480Gly  | 50        | 0.22    | rs200099128                | 27.4               |
| CMJ0001593 | A29     | DNMT3A | chr2  | c.1439T>G         | p.Val480Gly  | 41        | 0.15    | rs200099128                | 27.4               |
| CMJ0001593 | A34     | DNMT3A | chr2  | c.1439T>G         | p.Val480Gly  | 42        | 0.24    | rs200099128                | 27.4               |
| BH9002280  | R2      | EBF1   | chr5  | c.42C>A           | p.Ser14Arg   | 30        | 0.1     |                            | 21                 |
| DR9001565  | A15     | ECT2L  | chr6  | c.659C>A          | p.Pro220His  | 32        | 0.09    |                            | 22.6               |
| BS9001424  | A2      | FANCA  | chr16 | c.2499C>A         | p.Cys833Ter  | 50        | 0.06    |                            | 36                 |
| BH9002280  | R1      | FAT1   | chr4  | c.1063G>A         | p.Val355Met  | 32        | 0.09    |                            | 20.8               |
| JS9001595  | B32     | FBXW7  | chr4  | c.622A>T          | p.Thr208Ser  | 52        | 0.13    |                            | 14.04              |
| PJ9001456  | A11     | FGFR2  | chr10 | c.1265G>A         | p.Arg422His  | 40        | 0.08    |                            | 34                 |
| BH9002280  | L2      | FGFR4  | chr5  | c.1391G>T         | p.Arg464Leu  | 36        | 0.08    |                            | 34                 |
| PJ9001456  | A10     | FOXL2  | chr3  | c.315C>A          | p.Asn105Lys  | 48        | 0.06    |                            | 29.3               |
| DR9001565  | B4      | GNAS   | chr20 | c.1993C>T         | p.Arg665Cys  | 45        | 0.11    |                            | 25.6               |
| RP9001591  | B23     | IDH1   | chr2  | c.433G>T          | p.Val145Phe  | 57        | 0.14    |                            | 34                 |
| BH9002280  | R7      | KAT6B  | chr10 | c.1075G>T         | p.Asp359Tyr  | 41        | 0.1     |                            | 26.5               |
| BJA001578  | B13     | KDR    | chr4  | c.3274G>T         | p.Gly1092Cys | 46        | 0.07    |                            | 33                 |
| DR9001565  | A14     | KMT2C  | chr7  | c.8559C>A         | p.Cys2853Ter | 37        | 0.08    |                            | 35                 |
| BH9002280  | L2      | KMT2C  | chr7  | c.14274G>T        | p.Lys4758Asn | 40        | 0.08    |                            | 32                 |
| CMJ0001593 | A30     | LEF1   | chr4  | c.722+1C>T        |              | 30        | 0.1     | COSM585200                 | 26.1               |
| BS9001424  | A3      | MAML2  | chr11 | c.781G>T          | p.Gly261Cys  | 49        | 0.06    |                            | 24.7               |
| BH9002280  | R8      | MDM2   | chr12 | c.*2475A>G        |              | 62        | 0.16    |                            |                    |
| JS9001595  | B28     | MLH1   | chr3  | c.2164A>C         | p.Lys722Gln  | 113       | 0.07    |                            | 22.4               |
| JS9001595  | B28     | MLH1   | chr3  | c.2165A>C         | p.Lys722Thr  | 113       | 0.12    |                            | 24.7               |
| BJA001578  | B14     | MLH1   | chr3  | c.2165A>C         | p.Lys722Thr  | 85        | 0.09    |                            | 24.7               |
| BS9001424  | A2      | MLLT10 | chr10 | c.1464G>T         | p.Glu488Asp  | 36        | 0.08    | COSM1286220                | 23.2               |

|            |     |          |       |                       |                        |     |      |                           |       |
|------------|-----|----------|-------|-----------------------|------------------------|-----|------|---------------------------|-------|
| CMJ0001593 | A31 | MN1      | chr22 | c.3029G>A             | p.Trp1010Ter           | 36  | 0.22 |                           | 39    |
| DR9001565  | A18 | MSI2     | chr17 | c.57C>A               | p.Asp19Glu             | 18  | 0.17 |                           | 23.1  |
| CMJ0001593 | A28 | MYC      | chr8  | c.397G>T              | p.Asp133Tyr            | 49  | 0.06 |                           | 31    |
| BS9001424  | A3  | NCOR1    | chr17 | c.5506G>A             | p.Val1836Met           | 66  | 0.39 |                           | 24.9  |
| CDS001574  | B8  | NF1      | chr17 | c.3244G>T             | p.Gly1082Cys           | 48  | 0.15 |                           | 29.8  |
| BJA001578  | B15 | NF1      | chr17 | c.3245G>T             | p.Gly1082Val           | 44  | 0.23 |                           | 29    |
| BJA001578  | B16 | NF1      | chr17 | c.3244G>T             | p.Gly1082Cys           | 29  | 0.21 |                           | 29.8  |
| PJ9001456  | B2  | NF1      | chr17 | c.3244G>T             | p.Gly1082Cys           | 38  | 0.18 |                           | 29.8  |
| BH9002280  | B34 | NFIB     | chr9  | c.92G>T               | p.Trp31Leu             | 40  | 0.08 |                           | 28.1  |
| BJA001578  | A24 | NSD1     | chr5  | c.1034C>T             | p.Pro345Leu            | 49  | 0.06 |                           | 33    |
| JS9001595  | B28 | NT5C2    | chr10 | c.1460A>C             | p.Glu487Ala            | 28  | 0.11 |                           | 29.6  |
| BH9002280  | L2  | NT5C2    | chr10 | c.926C>A              | p.Thr309Asn            | 46  | 0.07 |                           | 23.4  |
| DR9001565  | A14 | NUMA1    | chr11 | c.4549G>T             | p.Val1517Phe           | 44  | 0.07 |                           | 24.2  |
| CDS001574  | B12 | P2RY8    | chrX  | c.815A>C              | p.Tyr272Ser            | 119 | 0.08 |                           | 25.1  |
| CDS001574  | B8  | P2RY8    | chrX  | c.815A>C              | p.Tyr272Ser            | 114 | 0.07 |                           | 25.1  |
| PJ9001456  | B2  | P2RY8    | chrX  | c.815A>C              | p.Tyr272Ser            | 132 | 0.09 |                           | 25.1  |
| BH9002280  | B35 | P2RY8    | chrX  | c.815A>C              | p.Tyr272Ser            | 118 | 0.07 |                           | 25.1  |
| CMJ0001593 | A29 | PAX7     | chr1  | c.892C>A              | p.Pro298Thr            | 42  | 0.07 |                           | 19.04 |
| PJ9001456  | A8  | PDE4DIP  | chr1  | c.636+11C>T           |                        | 55  | 0.07 |                           | 5.573 |
| PJ9001456  | A8  | PHOX2B   | chr4  | c.224G>T              | p.Ser75Ile             | 65  | 0.06 |                           | 18.27 |
| CMJ0001593 | A31 | PICALM   | chr11 | c.1602G>T             | p.Lys534Asn            | 44  | 0.07 |                           | 24.6  |
| CMJ0001593 | A34 | PICALM   | chr11 | c.1804G>T             | p.Ala602Ser            | 46  | 0.07 |                           | 16.67 |
| BS9001424  | A2  | PIK3R1   | chr5  | c.1274T>A             | p.Leu425His            | 56  | 0.14 |                           | 28.1  |
| DR9001565  | A14 | POU5F1   | chr6  | c.670G>A              | p.Glu224Lys            | 45  | 0.07 |                           | 23.7  |
| CDS001574  | B9  | PPFIBP1  | chr12 | c.2515-3C>A           |                        | 16  | 0.25 |                           | 15.42 |
| BJA001578  | A23 | PRCC     | chr1  | c.406C>T              | p.Pro136Ser            | 61  | 0.07 | rs11264542                | 18.1  |
| PJ9001456  | A8  | PTPN11   | chr12 | c.349C>A              | p.Leu117Ile            | 26  | 0.12 | COSM467817                | 24.4  |
| PJ9001456  | A10 | RAD21    | chr8  | c.505G>T              | p.Glu169Ter            | 38  | 0.08 |                           | 41    |
| PJ9001456  | B1  | RANBP17  | chr5  | c.529G>T              | p.Ala177Ser            | 51  | 0.14 | rs80184931<br>COSM249534  | 23.8  |
| PJ9001456  | B1  | RANBP17  | chr5  | c.529G>T              | p.Ala177Ser            | 51  | 0.14 | rs80184931<br>COSM249534  | 23.8  |
| RP9001591  | B20 | RAP1GDS1 | chr4  | c.512-2A>T            |                        | 37  | 0.14 |                           | 22.9  |
| PJ9001456  | A7  | RARA     | chr17 | c.848C>A              | p.Thr283Asn            | 50  | 0.06 |                           | 31    |
| BH9002280  | L5  | RUNX1    | chr21 | c.1126C>A             | p.Arg376Ser            | 31  | 0.1  |                           | 24.5  |
| PJ9001456  | A9  | RUNX1T1  | chr8  | c.121+245C>T          |                        | 46  | 0.07 |                           | 15.59 |
| JS9001595  | B27 | SETD2    | chr3  | c.1031G>T             | p.Ser344Ile            | 41  | 0.07 |                           | 19.69 |
| BS9001424  | A2  | SFPQ     | chr1  | c.1094G>T             | p.Arg365Leu            | 42  | 0.1  |                           | 34    |
| BJA001578  | B16 | SMARCAD1 | chr4  | c.2572T>C             | p.Phe858Leu            | 66  | 0.48 |                           | 23    |
| CMJ001593  | A34 | SMARCAD1 | chr4  | c.2572T>C             | p.Phe858Leu            | 22  | 0.41 |                           | 23    |
| RP9001591  | B22 | SMARCA2  | chr9  | c.667_675delCAGCAGCAG | p.Gln226_Gln228<br>del | 111 | 0.36 |                           |       |
| BH9002280  | L2  | SPEN     | chr1  | c.676C>T              | p.Arg226Trp            | 42  | 0.07 |                           | 34    |
| BS9001424  | A3  | SS18     | chr18 | c.322G>T              | p.Gly108Ter            | 41  | 0.07 |                           | 37    |
| CDS001574  | B10 | STAG2    | chrX  | c.2188G>T             | p.Val730Phe            | 39  | 0.18 |                           | 25.1  |
| RP9001591  | B21 | TET2     | chr4  | c.3901G>T             | p.Ala1301Ser           | 86  | 0.07 |                           | 28.7  |
| DR9001565  | A16 | THRAP3   | chr1  | c.2701C>T             | p.Arg901Ter            | 9   | 0.33 |                           | 41    |
| BJA001578  | B16 | TPM3     | chr1  | c.567-621T>C          |                        | 63  | 0.1  |                           | 15.12 |
| CDS001574  | B10 | TRRAP    | chr7  | c.2440C>G             | p.Pro814Ala            | 67  | 0.27 |                           | 24.1  |
| DR9001565  | A18 | TSC1     | chr9  | c.2148C>A             | p.Asn716Lys            | 48  | 0.06 |                           | 29.3  |
| DR9001565  | A15 | TSC2     | chr16 | c.5010C>A             | p.His1670Gln           | 36  | 0.08 | rs376306544               | 22.3  |
| BJA001578  | B13 | YWHAE    | chr17 | c.623C>T              | p.Thr208Met            | 38  | 0.08 |                           | 23.5  |
| BJA001578  | A23 | ZFH3     | chr16 | c.5221_5223delCAA     | p.Gln1741del           | 107 | 0.07 | rs372909378<br>COSM973528 |       |

|           |     |       |       |                   |              |     |      |                           |      |
|-----------|-----|-------|-------|-------------------|--------------|-----|------|---------------------------|------|
| BH9002280 | B36 | ZFH3  | chr16 | c.5221_5223delCAA | p.Gln1741del | 162 | 0.07 | rs372909378<br>COSM973528 |      |
| DR9001565 | A18 | ZRSR2 | chrX  | c.684C>A          | p.Ser228Arg  | 22  | 0.14 | rs372992384               | 25.5 |

---



**Supplemental Table 11.** Copy number alterations (CNAs) in most commonly altered ( $\geq 4$  CNV) genes among the cyst samples.

| Cyst ID | #Chr  | Start     | End       | Size  | Log2ratio | Type          | Class | Chr arm | p_value   | #Covered Genes | Gene(s)      |
|---------|-------|-----------|-----------|-------|-----------|---------------|-------|---------|-----------|----------------|--------------|
| A2      | chr9  | 88967882  | 88968131  | 249   | -1.6613   | deletion      | focal | 9q      | 8.90E-16  | 1              | ZCCHC6       |
| A8      | chr8  | 29207565  | 29207762  | 197   | 1.8895    | amplification | focal | 8p      | 4.59E-15  | 1              | DUSP4        |
| A9      | chr8  | 29207565  | 29207760  | 195   | 1.6685    | amplification | focal | 8p      | 3.68E-10  | 1              | DUSP4        |
| A10     | chr17 | 80048915  | 80048992  | 77    | 2.116     | amplification | focal | 17q     | 5.06E-10  | 1              | FASN         |
| A12     | chr8  | 29207565  | 29207762  | 197   | 1.5937    | amplification | focal | 8p      | 4.93E-11  | 1              | DUSP4        |
| A12     | chr9  | 34834124  | 34834503  | 379   | -1.7457   | deletion      | focal | 9p      | 3.19E-13  | 1              | FAM205B      |
| A14     | chr2  | 54150092  | 54154655  | 4563  | -0.8578   | deletion      | focal | 2p      | 1.62E-09  | 1              | PSME4        |
| A14     | chr6  | 152451796 | 152451986 | 190   | -1.2775   | deletion      | focal | 6q      | 7.94E-06  | 1              | SYNE1        |
| A14     | chr9  | 140063932 | 140064192 | 260   | -1.4343   | deletion      | focal | 9q      | 1.08E-07  | 1              | LRRC26       |
| A14     | chr17 | 17699029  | 17699140  | 111   | 1.891     | amplification | focal | 17p     | 3.66E-12  | 1              | RAI1         |
| A15     | chr2  | 109400015 | 109400282 | 267   | -1.0377   | deletion      | focal | 2q      | 3.29E-05  | 1              | RANBP2       |
| A15     | chr2  | 179583358 | 179583585 | 227   | 1.1507    | amplification | focal | 2q      | 7.54E-17  | 1              | TTN          |
| A15     | chr12 | 57594755  | 57594906  | 151   | -1.4565   | deletion      | focal | 12q     | 9.11E-61  | 1              | LRP1         |
| A15     | chr17 | 17699048  | 17699125  | 77    | 1.8025    | amplification | focal | 17p     | 4.90E-11  | 1              | RAI1         |
| A16     | chr1  | 228503564 | 228503856 | 292   | 0.9693    | amplification | focal | 1q      | 8.46E-16  | 1              | OBSCN        |
| A16     | chr2  | 54152612  | 54153125  | 513   | -1.1327   | deletion      | focal | 2p      | 4.43E-08  | 1              | PSME4        |
| A16     | chr2  | 73151446  | 73151703  | 257   | -1.704    | deletion      | focal | 2p      | 3.59E-13  | 1              | EMX1         |
| A16     | chr2  | 179452530 | 179452662 | 132   | -1.351    | deletion      | focal | 2q      | 8.27E-62  | 1              | TTN          |
| A16     | chr5  | 138729459 | 138729994 | 535   | -1.0243   | deletion      | focal | 5q      | 6.95E-110 | 1              | PROB1        |
| A16     | chr11 | 20404467  | 20404810  | 343   | -1.096    | deletion      | focal | 11p     | 2.11E-07  | 1              | HTATIP2      |
| A16     | chr12 | 57594755  | 57595001  | 246   | -1.091    | deletion      | focal | 12q     | 8.03E-27  | 1              | LRP1         |
| A17     | chr12 | 57594755  | 57595001  | 246   | -1.2297   | deletion      | focal | 12q     | 4.68E-12  | 1              | LRP1         |
| A17     | chr16 | 75018837  | 75033868  | 15031 | 0.9517    | amplification | focal | 16q     | 8.12E-05  | 2              | ZNRF1;WDR59  |
| A17     | chr17 | 17699034  | 17699145  | 111   | 1.4843    | amplification | focal | 17p     | 2.06E-10  | 1              | RAI1         |
| A18     | chr3  | 142775189 | 142839795 | 64606 | 1.0457    | amplification | focal | 3q      | 7.94E-31  | 2              | CHST2;U2SURP |
| A18     | chr8  | 124382010 | 124383222 | 1212  | -0.8392   | deletion      | focal | 8q      | 2.49E-95  | 1              | ATAD2        |
| A18     | chr12 | 57594755  | 57594906  | 151   | -1.391    | deletion      | focal | 12q     | 3.04E-12  | 1              | LRP1         |
| A18     | chr16 | 74808399  | 74908179  | 99780 | 1.0433    | amplification | focal | 16q     | 2.03E-34  | 2              | FA2H;WDR59   |
| A18     | chr17 | 2089896   | 2090209   | 313   | 0.773     | amplification | focal | 17p     | 6.48E-58  | 1              | SMG6         |
| A18     | chr17 | 17699029  | 17699125  | 96    | 1.7915    | amplification | focal | 17p     | 1.63E-11  | 1              | RAI1         |
| A18     | chr22 | 40058021  | 40058283  | 262   | 1.2817    | amplification | focal | 22q     | 3.82E-20  | 1              | CACNA11      |
| A18     | chr22 | 51158734  | 51158986  | 252   | 1.3375    | amplification | focal | 22q     | 1.87E-07  | 1              | SHANK3       |
| A21     | chr1  | 186649287 | 186649487 | 200   | -1.4627   | deletion      | focal | 1q      | 3.13E-11  | 1              | PTGS2        |
| A21     | chr4  | 117220797 | 117221011 | 214   | -1.583    | deletion      | focal | 4q      | 3.42E-14  | 1              | MIR1973      |
| A23     | chr16 | 2165656   | 2173558   | 7902  | -1.017    | deletion      | focal | 16p     | 1.73E-10  | 1              | PKD1         |
| A24     | chr4  | 117220797 | 117221011 | 214   | -1.39     | deletion      | focal | 4q      | 8.93E-13  | 1              | MIR1973      |
| A24     | chr9  | 34834370  | 34834503  | 133   | -2.128    | deletion      | focal | 9p      | 3.71E-19  | 1              | FAM205B      |
| A24     | chr17 | 28548645  | 28548761  | 116   | -1.751    | deletion      | focal | 17q     | 1.37E-11  | 1              | SLC6A4       |
| A24     | chr22 | 37771163  | 37771232  | 69    | -1.628    | deletion      | focal | 22q     | 6.29E-10  | 1              | ELFN2        |

|     |       |           |           |       |         |               |       |     |          |   |           |
|-----|-------|-----------|-----------|-------|---------|---------------|-------|-----|----------|---|-----------|
| A25 | chr8  | 29207516  | 29207762  | 246   | 1.4793  | amplification | focal | 8p  | 7.15E-12 | 1 | DUSP4     |
| A25 | chr11 | 6585470   | 6585688   | 218   | -1.251  | deletion      | focal | 11p | 9.73E-09 | 1 | DNHD1     |
| A27 | chr5  | 176821167 | 176821225 | 58    | -1.7185 | deletion      | focal | 5q  | 9.89E-11 | 1 | SLC34A1   |
| A27 | chr8  | 145649607 | 145649666 | 59    | -2.1955 | deletion      | focal | 8q  | 8.59E-19 | 1 | VPS28     |
| A28 | chr5  | 176821171 | 176821225 | 54    | -1.926  | deletion      | focal | 5q  | 2.72E-11 | 1 | SLC34A1   |
| A28 | chr8  | 145639222 | 145639276 | 54    | -2.335  | deletion      | focal | 8q  | 5.74E-17 | 1 | SLC39A4   |
| A28 | chr8  | 145649607 | 145649666 | 59    | -2.677  | deletion      | focal | 8q  | 1.65E-27 | 1 | VPS28     |
| A28 | chr17 | 80048906  | 80049027  | 121   | -2.2185 | deletion      | focal | 17q | 1.44E-14 | 1 | FASN      |
| A28 | chr19 | 16435952  | 16436100  | 148   | -1.982  | deletion      | focal | 19p | 3.77E-12 | 1 | KLF2      |
| A28 | chr22 | 37770507  | 37770863  | 356   | -1.2957 | deletion      | focal | 22q | 1.41E-08 | 1 | ELFN2     |
| A29 | chr5  | 176821166 | 176821225 | 59    | -1.4625 | deletion      | focal | 5q  | 6.69E-07 | 1 | SLC34A1   |
| A29 | chr9  | 34833951  | 34834822  | 871   | 0.978   | amplification | focal | 9p  | 5.64E-14 | 1 | FAM205B   |
| A29 | chr10 | 85981792  | 85981846  | 54    | -1.522  | deletion      | focal | 10q | 1.97E-18 | 1 | LRIT2     |
| A29 | chr11 | 6541070   | 6541124   | 54    | -1.608  | deletion      | focal | 11p | 2.08E-10 | 1 | DNHD1     |
| A29 | chr17 | 80048912  | 80048966  | 54    | -1.816  | deletion      | focal | 17q | 6.12E-12 | 1 | FASN      |
| A30 | chr5  | 132158646 | 132159102 | 456   | -1.1692 | deletion      | focal | 5q  | 4.28E-13 | 1 | SHROOM1   |
| A30 | chr7  | 100230963 | 100238353 | 7390  | -1.593  | deletion      | focal | 7q  | 4.78E-15 | 1 | TFR2      |
| A30 | chr7  | 156469165 | 156469217 | 52    | -1.8185 | deletion      | focal | 7q  | 1.26E-11 | 1 | RNF32     |
| A30 | chr8  | 124381366 | 124381470 | 104   | -1.6855 | deletion      | focal | 8q  | 3.55E-10 | 1 | ATAD2     |
| A30 | chr8  | 145639222 | 145639281 | 59    | -2.034  | deletion      | focal | 8q  | 2.27E-16 | 1 | SLC39A4   |
| A30 | chr17 | 80048912  | 80049034  | 122   | -2.1185 | deletion      | focal | 17q | 2.72E-17 | 1 | FASN      |
| A31 | chr1  | 186649287 | 186649472 | 185   | -1.6845 | deletion      | focal | 1q  | 5.47E-11 | 1 | PTGS2     |
| A31 | chr3  | 46414577  | 46414709  | 132   | -1.6825 | deletion      | focal | 3p  | 8.32E-12 | 1 | CCR5      |
| A31 | chr3  | 142839617 | 142839728 | 111   | -2.1695 | deletion      | focal | 3q  | 8.61E-18 | 1 | CHST2     |
| A31 | chr7  | 100230941 | 100238353 | 7412  | -1.312  | deletion      | focal | 7q  | 2.93E-36 | 1 | TFR2      |
| A32 | chr1  | 186649287 | 186649382 | 95    | -1.8705 | deletion      | focal | 1q  | 4.37E-13 | 1 | PTGS2     |
| A32 | chr2  | 73144998  | 73145197  | 199   | -1.7115 | deletion      | focal | 2p  | 4.18E-12 | 1 | EMX1      |
| A32 | chr2  | 109335979 | 109336107 | 128   | -1.622  | deletion      | focal | 2q  | 1.26E-09 | 1 | RANBP2    |
| A32 | chr7  | 156469165 | 156469217 | 52    | -1.361  | deletion      | focal | 7q  | 8.89E-07 | 1 | RNF32     |
| A32 | chr8  | 29207316  | 29207767  | 451   | -1.1267 | deletion      | focal | 8p  | 8.67E-13 | 1 | DUSP4     |
| A32 | chr14 | 100625826 | 100705839 | 80013 | -1.3802 | deletion      | focal | 14q | 4.21E-16 | 2 | DEGS2;YY1 |
| A32 | chr16 | 74993396  | 75018951  | 25555 | -1.1564 | deletion      | focal | 16q | 4.88E-10 | 1 | WDR59     |
| A32 | chr19 | 16435952  | 16436868  | 916   | -1.8797 | deletion      | focal | 19p | 1.42E-14 | 1 | KLF2      |
| A33 | chr3  | 45988080  | 45988218  | 138   | -2.362  | deletion      | focal | 3p  | 5.09E-23 | 1 | CXCR6     |
| A33 | chr4  | 117220797 | 117221011 | 214   | -1.7153 | deletion      | focal | 4q  | 2.40E-17 | 1 | MIR1973   |
| A33 | chr7  | 156469165 | 156469217 | 52    | -1.636  | deletion      | focal | 7q  | 1.54E-08 | 1 | RNF32     |
| A33 | chr8  | 29207316  | 29207762  | 446   | -1.5237 | deletion      | focal | 8p  | 3.40E-17 | 1 | DUSP4     |
| A33 | chr8  | 145639227 | 145639281 | 54    | -2.2075 | deletion      | focal | 8q  | 1.55E-18 | 1 | SLC39A4   |
| A33 | chr8  | 145649607 | 145649666 | 59    | -2.6625 | deletion      | focal | 8q  | 5.37E-23 | 1 | VPS28     |
| A33 | chr9  | 34834370  | 34834822  | 452   | 1.5777  | amplification | focal | 9p  | 1.10E-13 | 1 | FAM205B   |
| A33 | chr10 | 85981797  | 85981851  | 54    | -1.868  | deletion      | focal | 10q | 1.08E-12 | 1 | LRIT2     |
| A33 | chr14 | 100705589 | 100705782 | 193   | -1.4067 | deletion      | focal | 14q | 3.08E-09 | 1 | YY1       |
| A33 | chr16 | 2141697   | 2144251   | 2554  | 1.1213  | amplification | focal | 16p | 3.85E-47 | 1 | PKD1      |

|     |       |           |           |       |         |               |       |     |           |   |                 |
|-----|-------|-----------|-----------|-------|---------|---------------|-------|-----|-----------|---|-----------------|
| A33 | chr17 | 80048912  | 80048992  | 80    | -2.9085 | deletion      | focal | 17q | 8.68E-46  | 1 | FASN            |
| A34 | chr1  | 186649287 | 186649482 | 195   | -1.855  | deletion      | focal | 1q  | 1.00E-12  | 1 | PTGS2           |
| A34 | chr3  | 142839617 | 142839763 | 146   | -1.604  | deletion      | focal | 3q  | 3.06E-08  | 1 | CHST2           |
| A34 | chr5  | 132158922 | 132159082 | 160   | -1.69   | deletion      | focal | 5q  | 4.07E-09  | 1 | SHROOM1         |
| A34 | chr7  | 100230965 | 100238353 | 7388  | -1.522  | deletion      | focal | 7q  | 1.37E-11  | 1 | TFR2            |
| A34 | chr7  | 156469165 | 156469217 | 52    | -1.648  | deletion      | focal | 7q  | 5.53E-08  | 1 | RNF32           |
| A34 | chr8  | 29207516  | 29207762  | 246   | -1.7057 | deletion      | focal | 8p  | 5.37E-15  | 1 | DUSP4           |
| A34 | chr8  | 145639222 | 145639281 | 59    | -1.637  | deletion      | focal | 8q  | 1.07E-10  | 1 | SLC39A4         |
| A34 | chr8  | 145649607 | 145649666 | 59    | -1.8755 | deletion      | focal | 8q  | 6.42E-14  | 1 | VPS28           |
| A34 | chr10 | 85981792  | 85981851  | 59    | -1.6955 | deletion      | focal | 10q | 3.32E-10  | 1 | LRIT2           |
| A34 | chr14 | 100705689 | 100705772 | 83    | -1.7135 | deletion      | focal | 14q | 9.28E-10  | 1 | YY1             |
| A34 | chr16 | 2141697   | 2150027   | 8330  | 3.5649  | amplification | focal | 16p | 1.89E-15  | 1 | PKD1            |
| A34 | chr16 | 2155274   | 2159259   | 3985  | 0.8213  | amplification | focal | 16p | 4.40E-17  | 1 | PKD1            |
| A34 | chr16 | 2164597   | 2166657   | 2060  | 2.5752  | amplification | focal | 16p | 4.69E-73  | 1 | PKD1            |
| A34 | chr17 | 80048912  | 80049030  | 118   | -2.3423 | deletion      | focal | 17q | 1.58E-25  | 1 | FASN            |
| A34 | chr19 | 16435952  | 16436100  | 148   | -2.2115 | deletion      | focal | 19p | 1.19E-16  | 1 | KLF2            |
| B1  | chr5  | 176825611 | 176827304 | 1693  | 1.1094  | amplification | focal | 5q  | 2.44E-08  | 2 | SLC34A1;PFN3    |
| B1  | chr6  | 152776662 | 152776782 | 120   | -1.877  | deletion      | focal | 6q  | 2.06E-10  | 1 | SYNE1           |
| B1  | chr16 | 74926407  | 74927812  | 1405  | -1.4488 | deletion      | focal | 16q | 5.33E-09  | 1 | WDR59           |
| B1  | chr21 | 9825799   | 9826243   | 444   | 1.5545  | amplification | focal | 21p | 1.78E-10  | 2 | MIR3648;MIR3687 |
| B2  | chr1  | 228509919 | 228509955 | 36    | -1.9805 | deletion      | focal | 1q  | 2.71E-10  | 1 | OBSCN           |
| B2  | chr1  | 228553243 | 228553356 | 113   | -2.108  | deletion      | focal | 1q  | 4.41E-12  | 1 | OBSCN           |
| B2  | chr3  | 45988518  | 45988785  | 267   | -1.4422 | deletion      | focal | 3p  | 7.58E-08  | 1 | CXCR6           |
| B2  | chr6  | 152776662 | 152776782 | 120   | -2.4195 | deletion      | focal | 6q  | 2.23E-15  | 1 | SYNE1           |
| B2  | chr7  | 48965090  | 48965240  | 150   | -1.8115 | deletion      | focal | 7p  | 1.69E-08  | 1 | CDC14C          |
| B2  | chr7  | 150490214 | 150490333 | 119   | -2.3025 | deletion      | focal | 7q  | 4.50E-13  | 1 | TMEM176B        |
| B2  | chr10 | 43701488  | 43701586  | 98    | -2.6095 | deletion      | focal | 10q | 9.40E-19  | 1 | RASGEF1A        |
| B2  | chr14 | 100625825 | 100706000 | 80175 | 1.2708  | amplification | focal | 14q | 1.22E-09  | 2 | DEGS2;YY1       |
| B2  | chr21 | 9825804   | 9825862   | 58    | 1.91    | amplification | focal | 21p | 4.04E-07  | 1 | MIR3648         |
| B4  | chr3  | 45988520  | 45988796  | 276   | -1.65   | deletion      | focal | 3p  | 5.81E-09  | 1 | CXCR6           |
| B4  | chr3  | 46415373  | 46449287  | 33914 | 1.2725  | amplification | focal | 3p  | 1.06E-07  | 2 | CCR5;CCRL2      |
| B4  | chr5  | 138729831 | 138730341 | 510   | -1.614  | deletion      | focal | 5q  | 5.31E-48  | 1 | PROB1           |
| B4  | chr7  | 100230939 | 100231088 | 149   | 1.4725  | amplification | focal | 7q  | 3.03E-59  | 1 | TFR2            |
| B4  | chr8  | 124382259 | 124382359 | 100   | -2.4455 | deletion      | focal | 8q  | 2.43E-128 | 1 | ATAD2           |
| B4  | chr10 | 43701488  | 43701586  | 98    | -2.3825 | deletion      | focal | 10q | 3.89E-13  | 1 | RASGEF1A        |
| B4  | chr11 | 47611995  | 47612271  | 276   | -1.1743 | deletion      | focal | 11p | 1.73E-72  | 1 | C1QTNF4         |
| B4  | chr12 | 57600493  | 57601866  | 1373  | -1.272  | deletion      | focal | 12q | 2.26E-76  | 1 | LRP1            |
| B4  | chr13 | 111935393 | 111935581 | 188   | 1.665   | amplification | focal | 13q | 2.35E-09  | 1 | ARHGEF7         |
| B4  | chr19 | 16436032  | 16436100  | 68    | 2.0465  | amplification | focal | 19p | 3.65E-08  | 1 | KLF2            |
| B5  | chr1  | 186649309 | 186649464 | 155   | 1.773   | amplification | focal | 1q  | 9.28E-13  | 1 | PTGS2           |
| B5  | chr3  | 45988343  | 45988796  | 453   | -1.2036 | deletion      | focal | 3p  | 1.68E-08  | 1 | CXCR6           |
| B5  | chr3  | 46415373  | 46449681  | 34308 | 1.2063  | amplification | focal | 3p  | 3.13E-12  | 2 | CCR5;CCRL2      |
| B5  | chr13 | 111935404 | 111935581 | 177   | 1.632   | amplification | focal | 13q | 7.08E-09  | 1 | ARHGEF7         |

|     |       |           |           |       |         |               |       |     |           |   |            |
|-----|-------|-----------|-----------|-------|---------|---------------|-------|-----|-----------|---|------------|
| B5  | chr19 | 16436032  | 16436102  | 70    | 2.1625  | amplification | focal | 19p | 3.84E-10  | 1 | KLF2       |
| B5  | chr22 | 40058164  | 40058349  | 185   | 1.3883  | amplification | focal | 22q | 2.36E-06  | 1 | CACNA11    |
| B6  | chr3  | 46415373  | 46449912  | 34539 | 1.1287  | amplification | focal | 3p  | 1.95E-10  | 2 | CCR5;CCRL2 |
| B6  | chr7  | 48965090  | 48965240  | 150   | -2.249  | deletion      | focal | 7p  | 1.06E-32  | 1 | CDC14C     |
| B6  | chr10 | 43701488  | 43701586  | 98    | -2.029  | deletion      | focal | 10q | 4.73E-12  | 1 | RASGEF1A   |
| B6  | chr13 | 111935393 | 111935581 | 188   | 1.9473  | amplification | focal | 13q | 1.88E-12  | 1 | ARHGEF7    |
| B6  | chr17 | 2139638   | 2147991   | 8353  | 1.1798  | amplification | focal | 17p | 2.18E-08  | 1 | SMG6       |
| B6  | chr19 | 16436032  | 16436100  | 68    | 2.093   | amplification | focal | 19p | 2.72E-09  | 1 | KLF2       |
| B7  | chr7  | 150490191 | 150490333 | 142   | -1.997  | deletion      | focal | 7q  | 1.30E-11  | 1 | TMEM176B   |
| B7  | chr12 | 22354498  | 22354572  | 74    | -1.728  | deletion      | focal | 12p | 2.00E-08  | 1 | ST8SIA1    |
| B7  | chr15 | 65942820  | 65942902  | 82    | 1.974   | amplification | focal | 15q | 2.47E-09  | 1 | SLC24A1    |
| B7  | chr17 | 5307315   | 5307526   | 211   | -1.5743 | deletion      | focal | 17p | 2.03E-08  | 1 | NUP88      |
| B7  | chr21 | 9825827   | 9825862   | 35    | 1.932   | amplification | focal | 21p | 1.97E-08  | 1 | MIR3648    |
| B7  | chr22 | 39966697  | 39967018  | 321   | 1.3755  | amplification | focal | 22q | 2.34E-09  | 1 | CACNA11    |
| B8  | chr7  | 150490214 | 150490333 | 119   | -2.882  | deletion      | focal | 7q  | 3.33E-26  | 1 | TMEM176B   |
| B8  | chr12 | 22354498  | 22354588  | 90    | -1.9393 | deletion      | focal | 12p | 1.28E-15  | 1 | ST8SIA1    |
| B8  | chr15 | 65942801  | 65942911  | 110   | 1.753   | amplification | focal | 15q | 6.07E-10  | 1 | SLC24A1    |
| B8  | chr17 | 2139648   | 2139911   | 263   | 1.3837  | amplification | focal | 17p | 8.22E-07  | 1 | SMG6       |
| B8  | chr17 | 5307315   | 5307526   | 211   | -1.3473 | deletion      | focal | 17p | 3.08E-07  | 1 | NUP88      |
| B8  | chr21 | 9825827   | 9825862   | 35    | 1.8795  | amplification | focal | 21p | 1.14E-07  | 1 | MIR3648    |
| B9  | chr2  | 54164337  | 54164601  | 264   | -1.0807 | deletion      | focal | 2p  | 6.08E-12  | 1 | PSME4      |
| B9  | chr5  | 138729829 | 138730341 | 512   | -1.2277 | deletion      | focal | 5q  | 1.36E-35  | 1 | PROB1      |
| B9  | chr7  | 48965090  | 48965240  | 150   | -1.4005 | deletion      | focal | 7p  | 1.82E-168 | 1 | CDC14C     |
| B9  | chr7  | 127961182 | 127961515 | 333   | -1.3228 | deletion      | focal | 7q  | 6.31E-07  | 1 | RBM28      |
| B9  | chr8  | 124381918 | 124382359 | 441   | -1.4767 | deletion      | focal | 8q  | 1.26E-10  | 1 | ATAD2      |
| B9  | chr13 | 111935394 | 111935581 | 187   | 1.573   | amplification | focal | 13q | 2.92E-08  | 1 | ARHGEF7    |
| B9  | chr15 | 65942751  | 65942911  | 160   | 1.573   | amplification | focal | 15q | 3.27E-13  | 1 | SLC24A1    |
| B9  | chr17 | 1961193   | 1962167   | 974   | 0.9136  | amplification | focal | 17p | 6.34E-10  | 1 | HIC1       |
| B9  | chr17 | 5307315   | 5307576   | 261   | -1.5173 | deletion      | focal | 17p | 1.14E-11  | 1 | NUP88      |
| B9  | chr22 | 40075617  | 40075754  | 137   | 2.203   | amplification | focal | 22q | 5.86E-47  | 1 | CACNA11    |
| B10 | chr5  | 82876236  | 82876333  | 97    | -1.787  | deletion      | focal | 5q  | 1.35E-11  | 1 | VCAN       |
| B10 | chr7  | 127961182 | 127961499 | 317   | -1.3065 | deletion      | focal | 7q  | 2.12E-09  | 1 | RBM28      |
| B10 | chr7  | 150490191 | 150490333 | 142   | -1.854  | deletion      | focal | 7q  | 6.22E-10  | 1 | TMEM176B   |
| B10 | chr11 | 720806    | 721194    | 388   | -1.8205 | deletion      | focal | 11p | 8.57E-13  | 1 | EPS8L2     |
| B10 | chr12 | 22354498  | 22354572  | 74    | -2.456  | deletion      | focal | 12p | 3.35E-16  | 1 | ST8SIA1    |
| B10 | chr15 | 65942801  | 65942911  | 110   | 1.7313  | amplification | focal | 15q | 2.22E-10  | 1 | SLC24A1    |
| B10 | chr16 | 58608978  | 58612656  | 3678  | -1.05   | deletion      | focal | 16q | 2.32E-09  | 1 | CNOT1      |
| B10 | chr17 | 2139648   | 2139911   | 263   | 1.4765  | amplification | focal | 17p | 4.90E-10  | 1 | SMG6       |
| B10 | chr17 | 5307315   | 5307526   | 211   | -1.5467 | deletion      | focal | 17p | 3.76E-08  | 1 | NUP88      |
| B10 | chr21 | 9825827   | 9825862   | 35    | 1.883   | amplification | focal | 21p | 2.39E-09  | 1 | MIR3648    |
| B12 | chr4  | 117220749 | 117221011 | 262   | -1.5763 | deletion      | focal | 4q  | 1.56E-11  | 1 | MIR1973    |
| B12 | chr5  | 82876236  | 82876333  | 97    | -1.963  | deletion      | focal | 5q  | 4.89E-12  | 1 | VCAN       |
| B12 | chr5  | 132161461 | 132161833 | 372   | -1.2808 | deletion      | focal | 5q  | 6.15E-10  | 1 | SHROOM1    |

|     |       |           |           |       |         |               |       |     |          |   |               |
|-----|-------|-----------|-----------|-------|---------|---------------|-------|-----|----------|---|---------------|
| B12 | chr7  | 150490214 | 150490333 | 119   | -1.9495 | deletion      | focal | 7q  | 6.69E-12 | 1 | TMEM176B      |
| B12 | chr10 | 43701420  | 43701586  | 166   | -1.5267 | deletion      | focal | 10q | 1.71E-10 | 1 | RASGEF1A      |
| B12 | chr12 | 22354498  | 22354572  | 74    | -2.073  | deletion      | focal | 12p | 2.70E-13 | 1 | ST8SIA1       |
| B12 | chr21 | 9825827   | 9825862   | 35    | 1.78    | amplification | focal | 21p | 3.78E-08 | 1 | MIR3648       |
| B13 | chr1  | 228553240 | 228553356 | 116   | -1.917  | deletion      | focal | 1q  | 1.18E-09 | 1 | OBSCN         |
| B13 | chr6  | 152776662 | 152776782 | 120   | -2.089  | deletion      | focal | 6q  | 5.14E-12 | 1 | SYNE1         |
| B13 | chr7  | 48965090  | 48965240  | 150   | -2.2745 | deletion      | focal | 7p  | 2.85E-13 | 1 | CDC14C        |
| B13 | chr10 | 43701488  | 43701586  | 98    | -2.2395 | deletion      | focal | 10q | 1.63E-13 | 1 | RASGEF1A      |
| B13 | chr17 | 1960150   | 1960251   | 101   | -1.8065 | deletion      | focal | 17p | 6.73E-07 | 1 | HIC1          |
| B13 | chr17 | 5307315   | 5307526   | 211   | -1.7193 | deletion      | focal | 17p | 4.54E-09 | 1 | NUP88         |
| B14 | chr7  | 150490214 | 150490333 | 119   | -2.3325 | deletion      | focal | 7q  | 8.71E-15 | 1 | TMEM176B      |
| B15 | chr1  | 228553240 | 228553356 | 116   | -1.85   | deletion      | focal | 1q  | 1.09E-09 | 1 | OBSCN         |
| B15 | chr5  | 82876236  | 82876333  | 97    | -1.9095 | deletion      | focal | 5q  | 1.43E-16 | 1 | VCAN          |
| B15 | chr6  | 152776662 | 152776782 | 120   | -1.854  | deletion      | focal | 6q  | 2.42E-10 | 1 | SYNE1         |
| B15 | chr7  | 48965090  | 48965240  | 150   | -2.166  | deletion      | focal | 7p  | 3.83E-09 | 1 | CDC14C        |
| B15 | chr7  | 50450128  | 50450270  | 142   | -1.2557 | deletion      | focal | 7p  | 3.21E-06 | 1 | IKZF1         |
| B15 | chr12 | 22354485  | 22354583  | 98    | -1.3757 | deletion      | focal | 12p | 6.46E-08 | 1 | ST8SIA1       |
| B16 | chr5  | 82876236  | 82876333  | 97    | -2.0305 | deletion      | focal | 5q  | 4.19E-11 | 1 | VCAN          |
| B16 | chr6  | 152776662 | 152776782 | 120   | -2.2005 | deletion      | focal | 6q  | 2.40E-13 | 1 | SYNE1         |
| B16 | chr7  | 48964824  | 48965240  | 416   | -1.7197 | deletion      | focal | 7p  | 7.52E-12 | 1 | CDC14C        |
| B16 | chr12 | 22354485  | 22354588  | 103   | -1.7763 | deletion      | focal | 12p | 2.41E-13 | 1 | ST8SIA1       |
| B16 | chr16 | 2139910   | 2168152   | 28242 | 3.13535 | amplification | focal | 16p | 1.82E-06 | 2 | MIR1225;PKD1  |
| B18 | chr2  | 242743036 | 242743481 | 445   | -1.6063 | deletion      | focal | 2q  | 6.53E-20 | 1 | GAL3ST2       |
| B18 | chr5  | 132161561 | 132161833 | 272   | -1.3735 | deletion      | focal | 5q  | 9.70E-19 | 1 | SHROOM1       |
| B18 | chr13 | 20716327  | 20716453  | 126   | -1.807  | deletion      | focal | 13q | 4.88E-16 | 1 | GJA3          |
| B18 | chr22 | 51158898  | 51159277  | 379   | 0.8507  | amplification | focal | 22q | 7.65E-05 | 1 | SHANK3        |
| B19 | chr2  | 242742908 | 242743481 | 573   | -1.8317 | deletion      | focal | 2q  | 1.05E-22 | 1 | GAL3ST2       |
| B19 | chr3  | 52399006  | 52399077  | 71    | 1.666   | amplification | focal | 3p  | 3.07E-14 | 1 | DNAH1         |
| B19 | chr11 | 725632    | 726206    | 574   | -1.049  | deletion      | focal | 11p | 9.71E-11 | 1 | EPS8L2        |
| B19 | chr13 | 20716231  | 20716803  | 572   | -1.1435 | deletion      | focal | 13q | 8.42E-19 | 1 | GJA3          |
| B19 | chr17 | 28548645  | 28548761  | 116   | -1.3615 | deletion      | focal | 17q | 2.82E-09 | 1 | SLC6A4        |
| B19 | chr19 | 45261486  | 45261686  | 200   | 1.6175  | amplification | focal | 19q | 6.62E-13 | 1 | BCL3          |
| B19 | chr22 | 51158561  | 51159366  | 805   | 1.0255  | amplification | focal | 22q | 5.04E-11 | 1 | SHANK3        |
| B20 | chr9  | 140063392 | 140063522 | 130   | 1.4865  | amplification | focal | 9q  | 1.45E-11 | 1 | LRRC26        |
| B20 | chr20 | 3641504   | 3641629   | 125   | 1.3345  | amplification | focal | 20p | 1.41E-09 | 1 | GFRA4         |
| B20 | chr22 | 51158561  | 51159277  | 716   | 0.8748  | amplification | focal | 22q | 2.75E-14 | 1 | SHANK3        |
| B21 | chr4  | 117220796 | 117220996 | 200   | -1.8945 | deletion      | focal | 4q  | 1.07E-17 | 1 | MIR1973       |
| B21 | chr5  | 132161461 | 132161833 | 372   | -1.3123 | deletion      | focal | 5q  | 2.03E-15 | 1 | SHROOM1       |
| B21 | chr5  | 138730521 | 138730809 | 288   | 0.8453  | amplification | focal | 5q  | 7.00E-12 | 1 | PROB1         |
| B21 | chr7  | 50467867  | 50468252  | 385   | 1.2358  | amplification | focal | 7p  | 2.14E-18 | 1 | IKZF1         |
| B21 | chr8  | 145638556 | 145639186 | 630   | -0.6606 | deletion      | focal | 8q  | 5.50E-07 | 1 | SLC39A4       |
| B21 | chr9  | 140063392 | 140063522 | 130   | 1.2487  | amplification | focal | 9q  | 3.09E-11 | 1 | LRRC26        |
| B21 | chr11 | 20404467  | 20409321  | 4854  | -0.7895 | deletion      | focal | 11p | 2.69E-06 | 2 | PRMT3;HTATIP2 |

|     |       |           |           |      |         |               |       |     |          |   |                 |
|-----|-------|-----------|-----------|------|---------|---------------|-------|-----|----------|---|-----------------|
| B21 | chr17 | 1961819   | 1961905   | 86   | -2.217  | deletion      | focal | 17p | 1.24E-25 | 1 | HIC1            |
| B21 | chr20 | 3641404   | 3641629   | 225  | 1.175   | amplification | focal | 20p | 4.43E-10 | 1 | GFRA4           |
| B21 | chr22 | 51158596  | 51159277  | 681  | 1.04    | amplification | focal | 22q | 2.57E-11 | 1 | SHANK3          |
| B22 | chr3  | 52399006  | 52399077  | 71   | 1.4835  | amplification | focal | 3p  | 1.39E-11 | 1 | DNAH1           |
| B22 | chr5  | 138730521 | 138730794 | 273  | 0.8583  | amplification | focal | 5q  | 1.02E-16 | 1 | PROB1           |
| B22 | chr9  | 140063392 | 140063523 | 131  | 1.137   | amplification | focal | 9q  | 3.03E-09 | 1 | LRRC26          |
| B22 | chr17 | 28548645  | 28548761  | 116  | -1.315  | deletion      | focal | 17q | 5.42E-16 | 1 | SLC6A4          |
| B22 | chr20 | 3641404   | 3641629   | 225  | 0.9707  | amplification | focal | 20p | 1.06E-13 | 1 | GFRA4           |
| B22 | chr22 | 51158561  | 51159277  | 716  | 0.9116  | amplification | focal | 22q | 2.03E-07 | 1 | SHANK3          |
| B23 | chr1  | 6531079   | 6532607   | 1528 | 0.7618  | amplification | focal | 1p  | 7.33E-08 | 1 | PLEKHG5         |
| B23 | chr2  | 242742822 | 242743481 | 659  | -1.6527 | deletion      | focal | 2q  | 2.03E-15 | 1 | GAL3ST2         |
| B23 | chr3  | 52399006  | 52399077  | 71   | 1.635   | amplification | focal | 3p  | 4.22E-13 | 1 | DNAH1           |
| B23 | chr5  | 132161561 | 132161833 | 272  | -1.3883 | deletion      | focal | 5q  | 3.23E-14 | 1 | SHROOM1         |
| B23 | chr7  | 50467858  | 50468170  | 312  | 1.1407  | amplification | focal | 7p  | 9.50E-12 | 1 | IKZF1           |
| B23 | chr8  | 144917966 | 144918286 | 320  | 1.445   | amplification | focal | 8q  | 1.73E-08 | 1 | NRBP2           |
| B23 | chr13 | 20716327  | 20716583  | 256  | -1.4507 | deletion      | focal | 13q | 1.63E-14 | 1 | GJA3            |
| B23 | chr19 | 45261486  | 45261686  | 200  | 1.7085  | amplification | focal | 19q | 8.97E-15 | 1 | BCL3            |
| B23 | chr20 | 3641504   | 3641629   | 125  | 1.3705  | amplification | focal | 20p | 2.09E-09 | 1 | GFRA4           |
| B23 | chr22 | 51158561  | 51159227  | 666  | 1.0244  | amplification | focal | 22q | 1.96E-17 | 1 | SHANK3          |
| B24 | chr1  | 6531066   | 6531923   | 857  | 0.9837  | amplification | focal | 1p  | 3.76E-15 | 1 | PLEKHG5         |
| B24 | chr1  | 228520472 | 228520964 | 492  | -0.7784 | deletion      | focal | 1q  | 8.62E-08 | 1 | OBSCN           |
| B24 | chr3  | 52399006  | 52399077  | 71   | 1.282   | amplification | focal | 3p  | 1.66E-08 | 1 | DNAH1           |
| B24 | chr7  | 50467867  | 50468243  | 376  | 1.0012  | amplification | focal | 7p  | 2.98E-09 | 1 | IKZF1           |
| B24 | chr17 | 28548645  | 28548761  | 116  | -1.535  | deletion      | focal | 17q | 1.81E-12 | 1 | SLC6A4          |
| B24 | chr19 | 45261486  | 45261686  | 200  | 1.409   | amplification | focal | 19q | 7.47E-10 | 1 | BCL3            |
| B24 | chr20 | 3641404   | 3641629   | 225  | 1.0893  | amplification | focal | 20p | 4.46E-09 | 1 | GFRA4           |
| B24 | chr22 | 51158561  | 51159277  | 716  | 0.8182  | amplification | focal | 22q | 8.46E-08 | 1 | SHANK3          |
| B26 | chr2  | 73151367  | 73151693  | 326  | -1.2532 | deletion      | focal | 2p  | 3.03E-16 | 1 | EMX1            |
| B26 | chr2  | 242742828 | 242743468 | 640  | -1.3116 | deletion      | focal | 2q  | 2.33E-20 | 1 | GAL3ST2         |
| B26 | chr3  | 9988735   | 9989235   | 500  | 0.8192  | amplification | focal | 3p  | 7.14E-10 | 2 | PRRT3-AS1;PRRT3 |
| B26 | chr5  | 132161189 | 132161561 | 372  | -1.2353 | deletion      | focal | 5q  | 1.78E-11 | 1 | SHROOM1         |
| B26 | chr11 | 725632    | 725797    | 165  | -1.539  | deletion      | focal | 11p | 6.76E-11 | 1 | EPS8L2          |
| B26 | chr22 | 51158561  | 51159267  | 706  | 0.9688  | amplification | focal | 22q | 1.93E-07 | 1 | SHANK3          |
| B27 | chr2  | 73151469  | 73151693  | 224  | -1.9695 | deletion      | focal | 2p  | 1.63E-42 | 1 | EMX1            |
| B27 | chr3  | 9988746   | 9989170   | 424  | 0.9142  | amplification | focal | 3p  | 4.65E-12 | 2 | PRRT3-AS1;PRRT3 |
| B27 | chr5  | 132161211 | 132161837 | 626  | -0.901  | deletion      | focal | 5q  | 1.58E-12 | 1 | SHROOM1         |
| B27 | chr7  | 50467975  | 50468336  | 361  | 0.9292  | amplification | focal | 7p  | 1.89E-08 | 1 | IKZF1           |
| B27 | chr11 | 6592269   | 6592647   | 378  | 0.9815  | amplification | focal | 11p | 2.72E-10 | 1 | DNHD1           |
| B27 | chr13 | 20716324  | 20717024  | 700  | -1.0808 | deletion      | focal | 13q | 6.04E-28 | 1 | GJA3            |
| B27 | chr20 | 3641497   | 3641627   | 130  | 1.2855  | amplification | focal | 20p | 2.96E-09 | 1 | GFRA4           |
| B28 | chr1  | 6531535   | 6531723   | 188  | 1.0777  | amplification | focal | 1p  | 6.98E-10 | 1 | PLEKHG5         |
| B28 | chr11 | 725632    | 725795    | 163  | -1.538  | deletion      | focal | 11p | 1.59E-12 | 1 | EPS8L2          |

|     |       |           |           |      |         |               |       |     |          |   |                 |
|-----|-------|-----------|-----------|------|---------|---------------|-------|-----|----------|---|-----------------|
| B28 | chr11 | 20404467  | 20404667  | 200  | -1.2905 | deletion      | focal | 11p | 8.98E-08 | 1 | HTATIP2         |
| B28 | chr11 | 47611533  | 47612149  | 616  | 1.0485  | amplification | focal | 11p | 1.28E-11 | 1 | C1QTNF4         |
| B28 | chr13 | 20716231  | 20716684  | 453  | -1.6984 | deletion      | focal | 13q | 3.89E-38 | 1 | GJA3            |
| B28 | chr16 | 2140981   | 2141132   | 151  | 1.3995  | amplification | focal | 16p | 1.11E-10 | 1 | PKD1            |
| B28 | chr22 | 51158561  | 51159267  | 706  | 0.9202  | amplification | focal | 22q | 6.36E-09 | 1 | SHANK3          |
| B29 | chr11 | 725632    | 725797    | 165  | -1.3175 | deletion      | focal | 11p | 4.85E-08 | 1 | EPS8L2          |
| B29 | chr16 | 58620511  | 58620706  | 195  | -1.7075 | deletion      | focal | 16q | 1.98E-14 | 1 | CNOT1           |
| B29 | chr16 | 70366776  | 70366976  | 200  | -1.3285 | deletion      | focal | 16q | 4.07E-08 | 1 | DDX19B          |
| B29 | chr19 | 45261486  | 45261877  | 391  | 0.8518  | amplification | focal | 19q | 1.92E-08 | 1 | BCL3            |
| B30 | chr2  | 54152718  | 54153229  | 511  | -0.8728 | deletion      | focal | 2p  | 2.36E-09 | 1 | PSME4           |
| B30 | chr5  | 132161208 | 132161837 | 629  | -1.0965 | deletion      | focal | 5q  | 6.04E-19 | 1 | SHROOM1         |
| B30 | chr7  | 50467960  | 50468156  | 196  | 1.196   | amplification | focal | 7p  | 4.74E-09 | 1 | IKZF1           |
| B30 | chr11 | 47611533  | 47612149  | 616  | 0.7858  | amplification | focal | 11p | 1.09E-11 | 1 | C1QTNF4         |
| B30 | chr16 | 2141010   | 2141224   | 214  | 1.2497  | amplification | focal | 16p | 1.12E-13 | 1 | PKD1            |
| B30 | chr16 | 58620364  | 58620706  | 342  | -1.159  | deletion      | focal | 16q | 3.53E-13 | 1 | CNOT1           |
| B30 | chr22 | 51158561  | 51159257  | 696  | 0.9432  | amplification | focal | 22q | 1.55E-06 | 1 | SHANK3          |
| B31 | chr1  | 6531535   | 6531723   | 188  | 1.314   | amplification | focal | 1p  | 6.76E-14 | 1 | PLEKHG5         |
| B31 | chr3  | 9988746   | 9989146   | 400  | 0.8335  | amplification | focal | 3p  | 1.70E-07 | 2 | PRRT3-AS1;PRRT3 |
| B31 | chr9  | 140063347 | 140063522 | 175  | 1.021   | amplification | focal | 9q  | 8.48E-08 | 1 | LRRC26          |
| B31 | chr16 | 2140994   | 2141224   | 230  | 1.2693  | amplification | focal | 16p | 2.94E-12 | 1 | PKD1            |
| B31 | chr16 | 58620511  | 58620706  | 195  | -1.9055 | deletion      | focal | 16q | 3.45E-19 | 1 | CNOT1           |
| B32 | chr1  | 6531535   | 6531723   | 188  | 1.5887  | amplification | focal | 1p  | 4.06E-20 | 1 | PLEKHG5         |
| B32 | chr3  | 9988737   | 9989137   | 400  | 0.799   | amplification | focal | 3p  | 1.92E-10 | 2 | PRRT3-AS1;PRRT3 |
| B32 | chr9  | 140063397 | 140063522 | 125  | 1.3035  | amplification | focal | 9q  | 1.85E-08 | 1 | LRRC26          |
| B32 | chr11 | 20404467  | 20404667  | 200  | -1.342  | deletion      | focal | 11p | 7.48E-10 | 1 | HTATIP2         |
| B32 | chr11 | 47611533  | 47612149  | 616  | 1.0077  | amplification | focal | 11p | 6.21E-11 | 1 | C1QTNF4         |
| B32 | chr17 | 1953499   | 1959727   | 6228 | 0.8245  | amplification | focal | 17p | 3.01E-07 | 2 | MIR212;HIC1     |
| B32 | chr20 | 3641499   | 3641713   | 214  | 1.0373  | amplification | focal | 20p | 4.68E-08 | 1 | GFRA4           |
| B33 | chr3  | 9988746   | 9988868   | 122  | 1.401   | amplification | focal | 3p  | 3.06E-10 | 1 | PRRT3           |
| B33 | chr5  | 132161211 | 132161837 | 626  | -1.0332 | deletion      | focal | 5q  | 7.45E-16 | 1 | SHROOM1         |
| B33 | chr9  | 140063362 | 140063522 | 160  | 1.231   | amplification | focal | 9q  | 4.21E-12 | 1 | LRRC26          |
| B33 | chr11 | 6592269   | 6592583   | 314  | 1.1078  | amplification | focal | 11p | 2.35E-16 | 1 | DNHD1           |
| B33 | chr11 | 47611533  | 47611777  | 244  | 1.2553  | amplification | focal | 11p | 5.27E-13 | 1 | C1QTNF4         |
| B33 | chr16 | 2141005   | 2141224   | 219  | 1.17    | amplification | focal | 16p | 1.55E-10 | 1 | PKD1            |
| B34 | chr1  | 228561970 | 228562197 | 227  | -1.417  | deletion      | focal | 1q  | 3.65E-07 | 1 | OBSCN           |
| B34 | chr2  | 179399126 | 179399195 | 69   | 2.0045  | amplification | focal | 2q  | 2.60E-10 | 1 | TTN             |
| B34 | chr7  | 127953217 | 127953384 | 167  | 1.673   | amplification | focal | 7q  | 4.60E-07 | 1 | RBM28           |
| B34 | chr9  | 88967881  | 88968115  | 234  | 1.5827  | amplification | focal | 9q  | 5.58E-10 | 1 | ZCCHC6          |
| B35 | chr2  | 109380223 | 109380558 | 335  | 1.5542  | amplification | focal | 2q  | 4.42E-12 | 1 | RANBP2          |
| B35 | chr2  | 179399126 | 179399295 | 169  | 1.718   | amplification | focal | 2q  | 3.04E-11 | 1 | TTN             |
| B35 | chr7  | 127953217 | 127953384 | 167  | 1.972   | amplification | focal | 7q  | 2.36E-09 | 1 | RBM28           |
| B35 | chr9  | 88967884  | 88968115  | 231  | 1.8347  | amplification | focal | 9q  | 6.87E-13 | 1 | ZCCHC6          |

|     |       |           |           |      |         |               |       |     |          |   |        |
|-----|-------|-----------|-----------|------|---------|---------------|-------|-----|----------|---|--------|
| B36 | chr2  | 109380223 | 109380566 | 343  | 1.3542  | amplification | focal | 2q  | 1.76E-08 | 1 | RANBP2 |
| B36 | chr2  | 179399126 | 179399295 | 169  | 1.5203  | amplification | focal | 2q  | 1.39E-08 | 1 | TTN    |
| B36 | chr7  | 127953217 | 127953384 | 167  | 1.885   | amplification | focal | 7q  | 1.16E-08 | 1 | RBM28  |
| B36 | chr9  | 88967877  | 88968115  | 238  | 1.5647  | amplification | focal | 9q  | 2.51E-09 | 1 | ZCCHC6 |
| B36 | chr10 | 85984601  | 85984842  | 241  | 1.471   | amplification | focal | 10q | 2.16E-08 | 1 | LRIT2  |
| L2  | chr8  | 144919846 | 144919935 | 89   | 1.591   | amplification | focal | 8q  | 1.03E-11 | 1 | NRBP2  |
| L5  | chr2  | 54197623  | 54197858  | 235  | -1.577  | deletion      | focal | 2p  | 1.59E-07 | 1 | PSME4  |
| L5  | chr7  | 100238479 | 100238542 | 63   | 1.8115  | amplification | focal | 7q  | 3.24E-09 | 1 | TFR2   |
| L5  | chr8  | 144919854 | 144919930 | 76   | 2.301   | amplification | focal | 8q  | 2.80E-19 | 1 | NRBP2  |
| L5  | chr10 | 7769599   | 7769737   | 138  | -1.83   | deletion      | focal | 10p | 1.93E-07 | 1 | ITIH2  |
| R1  | chr8  | 144919859 | 144919935 | 76   | 1.963   | amplification | focal | 8q  | 9.28E-14 | 1 | NRBP2  |
| R1  | chr16 | 70365719  | 70367074  | 1355 | -1.1927 | deletion      | focal | 16q | 3.50E-06 | 1 | DDX19B |
| R2  | chr10 | 7769599   | 7769731   | 132  | -2.22   | deletion      | focal | 10p | 9.46E-12 | 1 | ITIH2  |
| R2  | chr16 | 70365722  | 70365878  | 156  | -2.0755 | deletion      | focal | 16q | 2.84E-09 | 1 | DDX19B |
| R2  | chr22 | 37770784  | 37770863  | 79   | 1.5575  | amplification | focal | 22q | 1.21E-06 | 1 | ELFN2  |
| R7  | chr2  | 54197623  | 54197855  | 232  | -1.9393 | deletion      | focal | 2p  | 4.32E-14 | 1 | PSME4  |
| R7  | chr8  | 144919859 | 144919910 | 51   | 1.8225  | amplification | focal | 8q  | 5.02E-09 | 1 | NRBP2  |
| R7  | chr10 | 7769599   | 7769736   | 137  | -2.1405 | deletion      | focal | 10p | 4.49E-11 | 1 | ITIH2  |
| R7  | chr16 | 70365714  | 70367558  | 1844 | -1.1529 | deletion      | focal | 16q | 7.01E-09 | 1 | DDX19B |
| R8  | chr3  | 142841136 | 142841168 | 32   | 1.598   | amplification | focal | 3q  | 1.12E-07 | 1 | CHST2  |
| R8  | chr8  | 144919859 | 144919935 | 76   | 2.045   | amplification | focal | 8q  | 4.19E-16 | 1 | NRBP2  |
| R8  | chr10 | 7769599   | 7769736   | 137  | -1.8335 | deletion      | focal | 10p | 6.79E-08 | 1 | ITIH2  |
| R8  | chr22 | 37770784  | 37770863  | 79   | 1.8855  | amplification | focal | 22q | 1.48E-09 | 1 | ELFN2  |



**Supplemental Table 12.** Copy number variation in *PKD* genes by renal cyst

| Patient ID | Cyst WES# | Chr   | *Log2 Ratio | Type          | Chr arm | Size (bp) | P value   | Gene                            | Exon      |
|------------|-----------|-------|-------------|---------------|---------|-----------|-----------|---------------------------------|-----------|
| JS9001595  | B28 (L8)  | chr16 | 1.4         | Amplification | 16p     | 151       | 1.11E-10  | <i>PKD1</i>                     | Ex43      |
| JS9001595  | B30 (R1)  | chr16 | 1.25        | amplification | 16p     | 214       | 1.12E-13  | <i>PKD1</i>                     | Ex43      |
| JS9001595  | B31 (R2)  | chr16 | 1.27        | amplification | 16p     | 230       | 2.94E-12  | <i>PKD1</i>                     | Ex43      |
| JS9001595  | B33 (R10) | chr16 | 1.17        | amplification | 16p     | 219       | 1.55E-10  | <i>PKD1</i>                     | Ex43      |
| CM001593   | A34 (R9)  | chr16 | 3.57        | amplification | 16p     | 8330      | 1.89E-15  | <i>PKD1</i>                     | Ex29-Ex41 |
| CM001593   | A34 (R9)  | chr16 | 0.82        | amplification | 16p     | 3985      | 4.40E-17  | <i>PKD1</i>                     | Ex15-Ex21 |
| CM001593   | A34 (R9)  | chr16 | 2.58        | amplification | 16p     | 2060      | 4.69E-73  | <i>PKD</i>                      | Ex8-Ex11  |
| CM001593   | A33 (R3)  | chr16 | 1.12        | amplification | 16p     | 2554      | 3.85E-47  | <i>PKD1</i>                     | Ex35-Ex41 |
| BJA001578  | B16 (L8)  | chr16 | 3.36        | amplification | 16p     | 28242     | 1.68E-29  | <i>PKD1</i> ;<br><i>MIR1225</i> | EX5-EX46  |
| BJA001578  | B16 (L8)  | chr4  | 2.06        | amplification | 4q      | 67810     | 6.76E-169 | <i>PKD2</i>                     | EX1-EX15  |
| BJA001578  | A23 (R4)  | chr16 | -1.02       | deletion      | 16p     | 7902      | 1.73E-10  | <i>PKD1</i>                     | Ex2-Ex10  |

All CNV changes are focal. Segment with an average read count Log2 ratio >0.6 were designated as gains and segments with a log2 value < -0.6 were categorized as losses.

**Supplemental Table 13.** WES analysis results of significantly mutated genes (n=53) in renal cyst epithelium by MuSiC

| Gene            | Indels | SNVs | Tot Muts | Covd Bps | Muts pMbp | FDR                 | Protein family                                                        | Protein Class                                                                                                    |
|-----------------|--------|------|----------|----------|-----------|---------------------|-----------------------------------------------------------------------|------------------------------------------------------------------------------------------------------------------|
| <i>PKD1</i>     | 10     | 20   | 30       | 1107621  | 27.09     | < 10 <sup>-23</sup> | Polycystin-1                                                          |                                                                                                                  |
| <i>RECQL</i>    | 0      | 9    | 9        | 136458   | 65.95     | < 10 <sup>-23</sup> | ATP-dependent DNA helicase Q1                                         | DNA helicase(PC00011)                                                                                            |
| <i>FAM46A</i>   | 6      | 0    | 6        | 165776   | 36.19     | 6.65E-13            | Protein FAM46A                                                        |                                                                                                                  |
| <i>SEC24D</i>   | 0      | 8    | 8        | 349918   | 22.86     | 4.08E-09            | Protein transport protein Sec24D                                      | vesicle coat protein(PC00235)                                                                                    |
| <i>SGSM1</i>    | 0      | 7    | 7        | 253079   | 27.66     | 1.47E-08            | Small G protein signaling modulator 1                                 | G-protein modulator(PC00022);cysteine protease(PC00081)                                                          |
| <i>KIAA1217</i> | 0      | 8    | 8        | 518291   | 15.44     | 4.49E-08            | Sickle tail protein homolog                                           |                                                                                                                  |
| <i>PKD2</i>     | 2      | 4    | 6        | 226448   | 26.5      | 1.63E-05            | Polycystin-2                                                          | G-protein modulator(PC00022);ion channel(PC00133);membrane-bound signaling molecule (PC00152); protease(PC00190) |
| <i>CC2D2A</i>   | 0      | 8    | 8        | 589344   | 13.57     | 1.63E-07            | Coiled-coil and C2 domain-containing protein 2A                       |                                                                                                                  |
| <i>PTH2</i>     | 3      | 0    | 3        | 19187    | 156.4     | 1.10E-07            | Tuberoinfundibular peptide of 39 residues                             |                                                                                                                  |
| <i>SEMA4C</i>   | 0      | 5    | 5        | 172406   | 29        | 4.69E-08            | Semaphorin-4C                                                         | membrane-bound signaling molecule(PC00152)                                                                       |
| <i>P2RY8</i>    | 0      | 4    | 4        | 78641    | 50.86     | 2.48E-07            | P2Y purinoceptor 8                                                    |                                                                                                                  |
| <i>MKMK2</i>    | 0      | 4    | 4        | 105276   | 38        | 5.02E-06            | MAP kinase-interacting serine/threonine-protein kinase 2              | non-motor microtubule binding protein(PC00166);non-receptor serine/threonine protein kinase(PC00167)             |
| <i>SLC14A2</i>  | 0      | 5    | 5        | 187786   | 26.63     | 3.83E-05            | Urea transporter 2                                                    |                                                                                                                  |
| <i>DNAH5</i>    | 0      | 9    | 9        | 910125   | 9.89      | 0.000504            | Dynein heavy chain 5, axonemal                                        | hydrolase(PC00121);microtubule binding motor protein(PC00156)                                                    |
| <i>CCDC122</i>  | 0      | 3    | 3        | 54214    | 55.34     | 0.000149            | Coiled-coil domain-containing protein 122                             |                                                                                                                  |
| <i>LRCH1</i>    | 0      | 5    | 5        | 169623   | 29.48     | 3.94E-05            | Leucine-rich repeat and calponin homology domain-containing protein 1 |                                                                                                                  |

|                |   |   |   |        |       |          |                                                     |                                                              |
|----------------|---|---|---|--------|-------|----------|-----------------------------------------------------|--------------------------------------------------------------|
| <i>TNN</i>     | 0 | 4 | 4 | 271054 | 14.76 | 3.94E-05 | Tenascin-N                                          | signaling molecule(PC00207)                                  |
| <i>SERTAD4</i> | 0 | 4 | 4 | 151849 | 26.34 | 0.001463 | SERTA domain-containing protein 4                   |                                                              |
| <i>ALS2</i>    | 0 | 5 | 5 | 596566 | 8.38  | 4.70E-05 | Alsin                                               |                                                              |
| <i>LPGAT1</i>  | 0 | 3 | 3 | 88832  | 33.77 | 0.000399 | Acyl-CoA:lysophosphatidylglycerol acyltransferase 1 |                                                              |
| <i>CST2</i>    | 0 | 2 | 2 | 27452  | 72.85 | 0.001211 | Cystatin-SA                                         |                                                              |
| <i>FRG1</i>    | 0 | 3 | 3 | 59621  | 50.32 | 0.001463 | Protein FRG1                                        | ribonucleoprotein(PC00201);transfer/carrier protein(PC00219) |
| <i>HRCT1</i>   | 1 | 1 | 2 | 19005  | 105.2 | 0.009061 | Histidine-rich carboxyl terminus protein 1          |                                                              |
| <i>VPS4B</i>   | 0 | 2 | 2 | 79449  | 25.17 | 0.001384 | Vacuolar protein sorting-associated protein 4B      | non-motor microtubule binding protein(PC00166)               |
| <i>CACNG7</i>  | 0 | 2 | 2 | 81648  | 24.5  | 0.000915 | Voltage-dependent calcium channel gamma-7 subunit   | voltage-gated calcium channel(PC00240)                       |
| <i>CNPY1</i>   | 0 | 2 | 2 | 18915  | 105.7 | 0.00209  | Protein canopy homolog 1                            |                                                              |
| <i>DCTN4</i>   | 0 | 3 | 3 | 138712 | 21.63 | 0.000936 | Dynactin subunit 4                                  |                                                              |
| <i>IQGAP1</i>  | 0 | 3 | 3 | 351205 | 8.54  | 0.004638 | Ras GTPase-activating-like protein IQGAP1           | G-protein modulator(PC00022)                                 |
| <i>FAM155B</i> | 2 | 0 | 2 | 74222  | 26.95 | 0.001651 | Transmembrane protein FAM155B                       |                                                              |
| <i>LAMP1</i>   | 0 | 3 | 3 | 91360  | 32.84 | 0.014356 | Lysosome-associated membrane glycoprotein 1         | membrane trafficking regulatory protein(PC00151)             |
| <i>FREM1</i>   | 0 | 5 | 5 | 558999 | 8.94  | 0.029635 | FRAS1-related extracellular matrix protein 1        |                                                              |
| <i>MRM1</i>    | 0 | 2 | 2 | 69244  | 28.88 | 0.025275 | rRNA methyltransferase 1, mitochondrial             |                                                              |
| <i>PTS</i>     | 0 | 2 | 2 | 33871  | 59.05 | 0.00475  | 6-pyruvoyl tetrahydrobiopterin synthase             |                                                              |
| <i>ESYT3</i>   | 0 | 3 | 3 | 208710 | 14.37 | 0.001546 | Extended synaptotagmin-3                            |                                                              |
| <i>UBR7</i>    | 0 | 3 | 3 | 185315 | 16.19 | 0.001906 | Putative E3 ubiquitin-protein ligase UBR7           |                                                              |
| <i>CAD</i>     | 0 | 4 | 4 | 627659 | 6.37  | 0.000654 | CAD protein                                         | cysteine protease(PC00081);ligase(PC00142);                  |

|                 |   |   |   |        |       |          |                                                                                                              |                                                                        |                                               |
|-----------------|---|---|---|--------|-------|----------|--------------------------------------------------------------------------------------------------------------|------------------------------------------------------------------------|-----------------------------------------------|
|                 |   |   |   |        |       |          |                                                                                                              |                                                                        | metalloprotease(PC00153);transferase(PC00220) |
| <i>DHRS4</i>    | 0 | 2 | 2 | 47853  | 41.79 | 0.004503 | Dehydrogenase/reductase SDR family member 4                                                                  |                                                                        |                                               |
| <i>ACTR3</i>    | 0 | 3 | 3 | 95408  | 31.44 | 0.00475  | Actin-related protein 3                                                                                      | actin and actin related protein(PC00039)                               |                                               |
| <i>MAZ</i>      | 0 | 3 | 3 | 269853 | 11.12 | 0.001546 | Myc-associated zinc finger protein                                                                           |                                                                        |                                               |
| <i>TMC1</i>     | 0 | 3 | 3 | 210577 | 14.25 | 0.002581 | Transmembrane channel-like protein 1                                                                         |                                                                        |                                               |
| <i>NKAIN2</i>   | 0 | 3 | 3 | 89860  | 33.39 | 0.042416 | Sodium/potassium-transporting ATPase subunit beta-1-interacting protein 2                                    |                                                                        |                                               |
| <i>SMARCA2</i>  | 2 | 1 | 3 | 395769 | 7.58  | 0.014643 | Probable global transcription activator SNF2L2                                                               | DNA helicase(PC00011)                                                  |                                               |
| <i>WDFY3</i>    | 0 | 5 | 5 | 737275 | 6.78  | 0.012448 | WD repeat and FYVE domain-containing protein 3                                                               |                                                                        |                                               |
| <i>DNMT3A</i>   | 0 | 3 | 3 | 303234 | 9.89  | 0.002589 | DNA (cytosine-5)-methyltransferase 3A                                                                        |                                                                        |                                               |
| <i>NEUROD2</i>  | 0 | 2 | 2 | 68730  | 29.1  | 0.073826 | Neurogenic differentiation factor 2                                                                          | basic helix-loop-helix transcription factor(PC00055);nuclease(PC00170) |                                               |
| <i>OR5M1</i>    | 0 | 2 | 2 | 54979  | 36.38 | 0.108772 | Olfactory receptor 5M1                                                                                       |                                                                        |                                               |
| <i>SMARCAD1</i> | 0 | 2 | 2 | 223937 | 8.93  | 0.008335 | SWI/SNF-related matrix-associated actin-dependent regulator of chromatin subfamily A containing DEAD/H box 1 | DNA helicase(PC00011)                                                  |                                               |
| <i>KIAA1377</i> | 0 | 3 | 3 | 290782 | 10.32 | 0.00732  | Centrosomal protein of 126 kDa                                                                               |                                                                        |                                               |
| <i>GJC2</i>     | 1 | 1 | 2 | 55640  | 35.95 | 0.125793 | Gap junction gamma-2 protein                                                                                 | gap junction(PC00105)                                                  |                                               |
| <i>SPG7</i>     | 0 | 3 | 3 | 347762 | 8.63  | 0.003873 | Paraplegin                                                                                                   | metalloprotease(PC00153)                                               |                                               |
| <i>ZFX3</i>     | 2 | 1 | 3 | 701642 | 4.28  | 0.015709 | Zinc finger homeobox protein 3                                                                               |                                                                        |                                               |
| <i>RGS1</i>     | 0 | 2 | 2 | 41636  | 48.04 | 0.036208 | Regulator of G-protein signaling 1                                                                           | G-protein modulator(PC00022)                                           |                                               |
| <i>PTGER1</i>   | 0 | 2 | 2 | 43242  | 46.25 | 0.022244 | Prostaglandin E2 receptor EP1 subtype                                                                        | G-protein coupled receptor(PC00021)                                    |                                               |

FDR, false discovery rate.

**Supplemental Table 14.** Constitutional pathogenic mutations in principal ciliopathy genes

| Gene      | Category | #Chr  | Position  | dbSNP<br>ID# | AlleleFreq | SnpeffEffect                             | Gene   | SnpeffHGVS.c     | SnpeffHGVS.p |
|-----------|----------|-------|-----------|--------------|------------|------------------------------------------|--------|------------------|--------------|
| PJ9001456 | P.C.     | chr1  | 214822159 | None         | 43/21      | frameshift_variant                       | CENPF  | c.7975_7976dupAG | p.Ser2659fs  |
| PJ9001457 | P.S      | chr11 | 76912556  | None         | 34/26      | frameshift_variant                       | MYO7A  | c.4919delG       | p.Gly1640fs  |
| CMJ001593 | P.C      | chr4  | 15589551  | None         | 45/28      | splice_donor_variant&intron_variant      | CC2D2A | c.4179+1delG     |              |
| CMJ001595 | P.S      | chr2  | 166810195 | None         | 19/74      | frameshift_variant&splice_region_variant | TTC21B | c.20_21insCG     | p.Lys7fs     |

P.S., pathogenic inferred from snpeff 'HIGH' impact annotation; P.C., pathogenic inferred from ClinVar.

## SUPPLEMENTAL STATISTICAL ANALYSIS

### Analysis of somatic variant counts by patient age

#### I. Analysis of variant counts (N=3,263 variations) in study subjects (N=9)

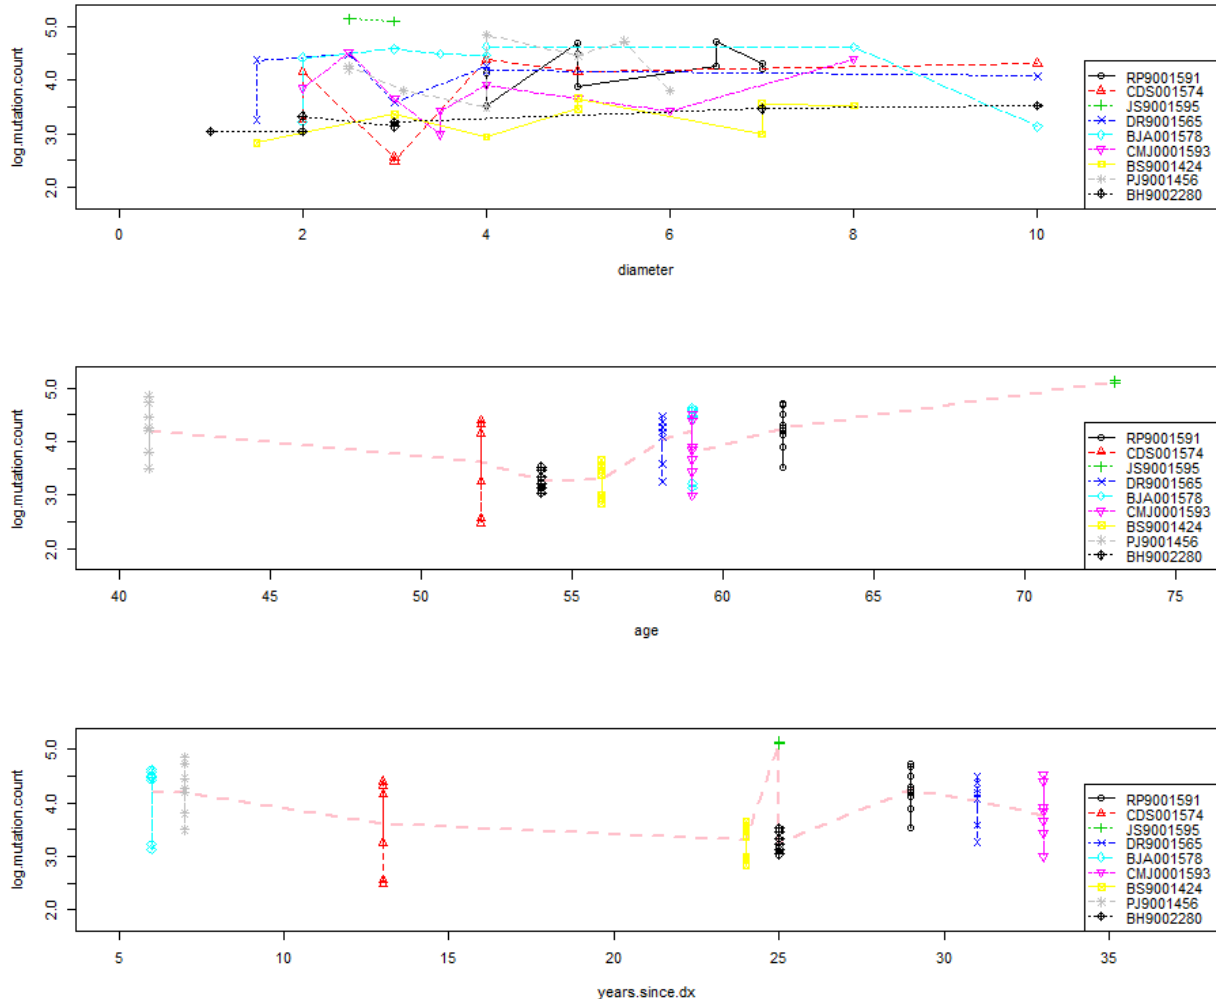

Below, we fit a linear mixed effects model, where the mixed effects consist of fixed and random effects. The fixed effects are diameter and age. The random effect is a random intercept for each subject. The model is; therefore:

$$\text{Log}(\text{mutation count}_{ij}) = \beta_0 + \beta_1 * \text{diameter}_{ij} + \beta_2 * \text{age}_i + \gamma_{0i} + \epsilon_{ij},$$

where  $i=1, \dots, 9$  indicates the subject and  $j=1, \dots, m_i$  indicates the # of observations per subject. Here  $\gamma_{0i} \sim \text{Normal}(0, \sigma_\gamma)$  is the random effect for subject  $i$ , and  $\epsilon_{ij} \sim \text{Normal}(0, \sigma_\epsilon)$  is the residual error.

```
lme(log.mutation.count~diameter+age,random=~1|patient)
```

```
Linear mixed-effects model fit by REML
```

```
Random effects:
```

```
Formula: ~1 | patient  
(Intercept) Residual  
StdDev: 0.477987 0.4896461
```

```
Fixed effects: log.mutation.count ~ diameter + age  
Value Std.Error DF t-value p-value  
(Intercept) 1.9914013 1.2904255 55 1.543213 0.1285  
diameter 0.0385568 0.0277155 55 1.391165 0.1698  
age 0.0314109 0.0224326 7 1.400234 0.2042
```

```
Correlation:  
(Intr) diamtr  
diameter -0.111  
age -0.987 0.019
```

```
Standardized within-Group Residuals:
```

```
Min Q1 Med Q3 Max  
-2.5490576 -0.6135790 0.1578540 0.6405002 1.6287799
```

```
Number of Observations: 65
```

```
Number of Groups: 9
```

The reason age is not significant ( $p=0.2042$ ) in the model above is because patient PJ9001456 (grey \*) is very young (41) but has a very high mutation count. Therefore we do not see a linear increase in mutation count with age. If we were to restrict the analysis to all subjects over 50, then the effect of age would be very significant ( $p=0.005$ ; see output below).

```
Linear mixed-effects model fit by REML
```

```
Data: NULL
```

```
AIC BIC logLik  
108.0787 118.0236 -49.03933
```

```
Random effects:
```

```
Formula: ~1 | patient  
(Intercept) Residual  
StdDev: 0.2104161 0.4903749
```

```
Fixed effects: log.mutation.count ~ diameter + age  
Value Std.Error DF t-value p-value  
(Intercept) -1.4649076 1.2212564 48 -1.199509 0.2362  
diameter 0.0387396 0.0279791 48 1.384590 0.1726  
age 0.0885528 0.0207249 6 4.272762 0.0052
```

```
Correlation:  
(Intr) diamtr  
diameter -0.137  
age -0.992 0.037
```

```
Standardized within-Group Residuals:
```

```
Min Q1 Med Q3 Max  
-2.37587345 -0.46163074 -0.01423317 0.81118109 1.87578346
```

```
Number of Observations: 57
```

```
Number of Groups: 8
```

## II. Analysis of variant counts (N=1,784 variations classified as pathogenic or likely pathogenic) in study subjects (N=9)

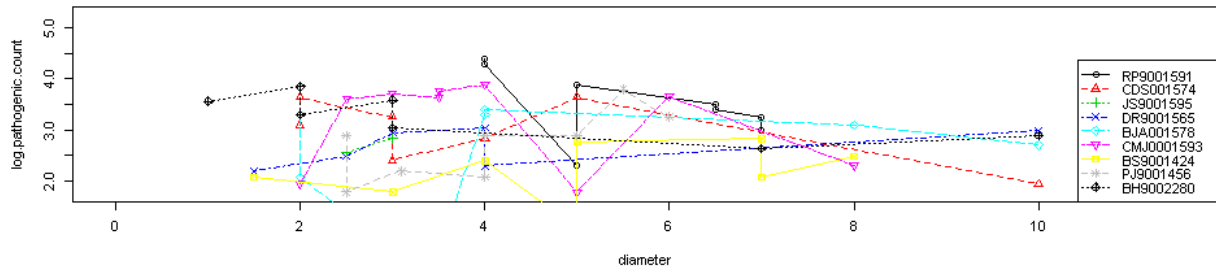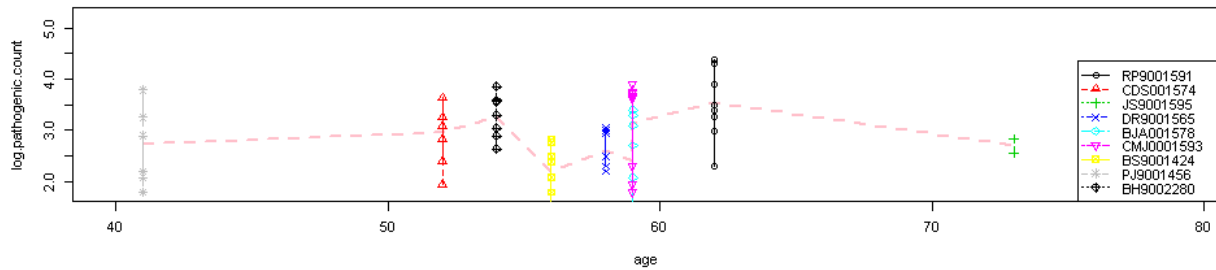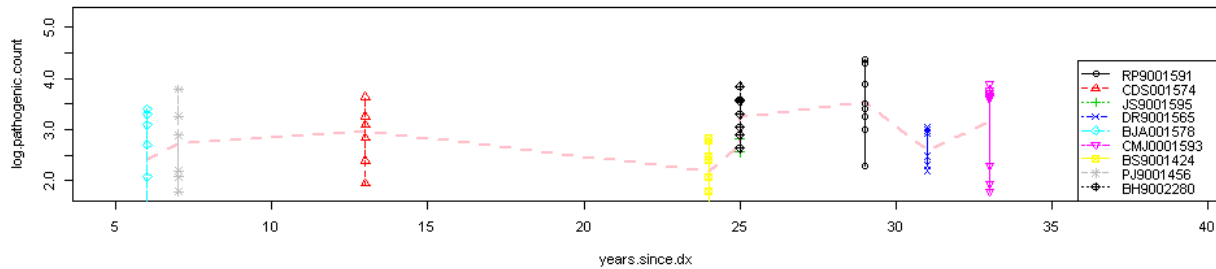

```
> out=lme(log.pathogenic.count~diameter+age, random=restruct(~1|patient, pdClass="pdSymm", REML=FALSE))
```

```
> summary(out)
```

Linear mixed-effects model fit by REML

Data: NULL

|  | AIC      | BIC     | logLik    |
|--|----------|---------|-----------|
|  | 170.2983 | 180.934 | -80.14915 |

Random effects:

Formula: ~1 | patient

| (Intercept)       | Residual  |
|-------------------|-----------|
| StdDev: 0.3965993 | 0.7146579 |

StdDev: 0.3965993 0.7146579

Fixed effects: log.pathogenic.count ~ diameter + age

|             | Value      | Std.Error | DF | t-value    | p-value |
|-------------|------------|-----------|----|------------|---------|
| (Intercept) | 2.5354821  | 1.2618525 | 55 | 2.0093331  | 0.0494  |
| diameter    | -0.0037608 | 0.0401213 | 55 | -0.0937364 | 0.9257  |



```

age          0.0058488 0.0219831 7 0.2660608 0.7979
Correlation:
  (Intr) diamtr
diameter -0.147
age      -0.982 0.010

```

```

Standardized within-Group Residuals:
      Min      Q1      Med      Q3      Max
-2.5909548 -0.6564159 0.2112497 0.7442148 1.4777303

```

```

Number of Observations: 65
Number of Groups: 9

```

When we remove patient PJ9001456, age is a significant predictor (higher age implies higher pathogenic count).

```

> out2=lme(log.pathogenic.count~diameter+age,random=reStruct(~1|patient,pdCla
ss="pdSymm",REML=FALSE))
> summary(out2)

```

Linear mixed-effects model fit by REML

```

Data: NULL
      AIC      BIC    logLik
133.5011 143.446 -61.75055

```

Random effects:

```

Formula: ~1 | patient
      (Intercept) Residual
StdDev: 2.573239e-05 0.6503021

```

Fixed effects: log.pathogenic.count ~ diameter + age

```

      Value Std.Error DF  t-value p-value
(Intercept) -4.004220 1.2008126 48 -3.334592 0.0017
diameter      0.058036 0.0362775 48  1.599769 0.1162
age           0.112998 0.0204946  6  5.513526 0.0015

```

```

Correlation:
  (Intr) diamtr
diameter -0.129
age      -0.988 -0.005

```

```

Standardized within-Group Residuals:
      Min      Q1      Med      Q3      Max
-2.07998196 -0.64887401 0.08380959 0.72471385 1.99506941

```

```

Number of Observations: 57
Number of Groups: 8

```

## **SUPPLEMENTAL METHODS**

### **Study Subjects**

Patients enrolled in this study were previously diagnosed with ADPKD and were scheduled for a living donor kidney transplant, and removal of one, or both native kidneys at the New York-Presbyterian Hospital/Weill Cornell Medicine campus (NYPH-WCM). Subjects were identified during a preoperative evaluation that occurred 7-10 days before transplant surgery (Supplementary Figure 1). The transplant surgeon (S.K.) determined whether there were clinical indications for nephrectomy prior to enrollment of each subject. If nephrectomy was planned, and the subject was eligible for enrollment, then informed consent was obtained. The protocol was approved by the WCM IRB.

### **Tissue processing and epithelial cell isolation**

Following nephrectomy, the kidney(s) were immediately placed on ice and underwent gross examination (S.S., B.R.). Thereafter, 5-20 cysts per kidney were processed; cyst size and volume were recorded, and cyst epithelial cells were isolated according to standard procedures<sup>1</sup>. Each cyst cavity was washed several times with phosphate buffered solution (PBS) and then incubated with PBS/EDTA to remove epithelial cells from the basement membrane. Epithelial cells were collected by centrifugation and stored at -80°C. DNA was isolated from the cyst epithelial cells and peripheral blood leukocytes (PBL) using the Genra Puregene DNA extraction kit (Qiagen, Germantown, MD).

## **Sanger Sequencing**

*PKD1* (NM\_000296.2) and *PKD2* (NM\_000297.2) were analyzed by Sanger sequencing as previously described <sup>2</sup>. To avoid amplification of *PKD1* pseudogenes, *PKD1* was amplified using long-range PCR (LR-PCR) primers anchored either in the rare mismatched region within the human homologs, or in the single-copy region of *PKD1* (GeneAmp High Fidelity PCR System, ABI, Foster City, CA). Sanger sequencing data were analyzed by Mutation Surveyor software vs.4.0 (Soft Genetics, State College, PA).

## **Long-range PCR (LR-PCR) Next Generation Sequencing (NGS)**

PKD gene analysis using paired-end NGS was performed by multiplexing individually bar-coded LR-PCR libraries analyzing them in one MiSeq system flow cell (Illumina). Sequencing data were analyzed using a laboratory-developed computational pipeline as described by Tan et al. <sup>3</sup>.

## **Whole Exome Sequencing (WES) and Data Analysis**

WES (357,999 exons, >20,000 genes) analyses of renal cyst epithelia and PBL specimens were performed using the HaloPlex Target Enrichment System (Agilent Technologies) and massive parallel sequencing on the Illumina system (San Diego, CA). Somatic and constitutional mutations were analyzed in matched cyst and PBL samples, respectively, and co-analyzed according to established procedures. Briefly, 225 ng of genomic DNA was digested using restriction enzymes, purified and assessed for quality using the Bioanalyzer. The resulting DNA was then hybridized to HaloPlex probes coupled to Illumina sequence motifs and sample barcodes, followed by solid phase capture. Biotinylated DNA-probe hybrids were then ligated and amplified by PCR. The resulting exome DNA library was purified using the Agencourt AMPure XP beads (Beckman Coulter, Inc., Brea, CA) and sequenced on the Illumina HiSeq 2500 platform (100 bp paired-end reads). The total number of reads and captured reads

among these specimens were 67.5 M $\pm$ 7.0 M and 55.0 M $\pm$ 5.2 M (81.6%  $\pm$  2.2%), respectively.

WES data analyses of the cyst and matched germline were performed for simultaneous detection of somatic single nucleotide variation (SNV), indels, and copy number variations (CNVs) as previously described<sup>4</sup>. Germline variants were eliminated from the somatic variant list using an FDR corrected Fisher exact test. For identification of somatic mutations, demultiplexed reads from Illumina sequencers were mapped against the GRC37/hg19 human reference genome (vs.19) using Burrows-Wheeler Aligner (BWA 0.7.8) (<http://bio-bwa.sourceforge.net/>) with the recommended standard settings and preprocessed with SAMtools 0.1.19. GATK (Version 2.8) (<https://www.broadinstitute.org/gatk/>) for local realignment and base quality score recalibration of the mapped reads. SNVs were called by MuTect (Version 1.1.4) (<https://www.broadinstitute.org/cancer/cga/mutect>) with the default criteria and filters. Small indels were detected by GATK. Mutations were filtered by variant allele frequency (VAF) where the mutation had to be present in the cyst with minimum total coverage of 8x and a VAF >5% and/or a min of 2 reads. Somatic CNVs were called with VarScan2 (<http://varscan.sourceforge.net>). Raw copy number regions with chromosome, start position, stop position, and log<sub>2</sub> value were processed with DNACopy package (<http://www.bioconductor.org/packages/release/bioc/html/DNACopy.html>) to produce segmented calls delineated by significant change-points of at least three standard deviations (SD). Segments with a log<sub>2</sub> value >0.6 were designated as gains and segments with a log<sub>2</sub> value < -0.6 were categorized as losses.

### **Significantly mutated genes and pathway analysis**

The pathogenic potential of missense variants was evaluated using the computational analysis tool Combined Annotation–Dependent Depletion (CADD), which enables scoring of deleteriousness of SNVs as well as indel variants. A CADD value of >15 suggests the variant is

potentially pathogenic <sup>5</sup> (<http://cadd.gs.washington.edu/>). Potential splice-site effects were evaluated using splice site prediction tools ESEfinder 3.0 (<http://krainer01.cshl.edu/cgi-bin/tools/ESE3/ese finder.cgi?process=home>), Human splicing finder 3.1 (<http://www.umd.be/HSF3/>) and NNSplice (<https://omictools.com/nns splice-tool>) with default settings for all missense, synonymous and intronic changes. Pathogenic and likely pathogenic variants were further filtered by VAF (>30%) and subjected for pathway analysis to identify overrepresented pathways using Reactome (<https://reactome.org/>) and verified with David (<https://david.ncifcrf.gov/>). Only significantly overrepresented pathways with low p-values (<0.05); probability that overlap between the queried variant and pathway occur by chance, were reported. Existing variations with a population allele frequency >5% in ExAC (<http://exac.broadinstitute.org/>) were filtered out as well.

The significance of mutated genes and pathways was analyzed with the Mutational Significance In Cancer (MuSiC) suite of tools (<http://gmt.genome.wustl.edu/packages/genome-music/index.html>) with the default settings. The MuSiC algorithm calculates the mutation number per gene and compares it to the background mutation rate, applying a Q-score metric and ranking the mutation significance. This algorithm assigns mutations to seven categories: AT transition, AT transversion, CG transition, CG transversion, CpG transition, CpG transversion and indel, and then uses statistical methods based on convolution, the hypergeometric distribution, and likelihood to combine the category-specific binomials to obtain overall P or q values.

## **Droplet Digital PCR**

*PKD1* and *PKD2* CNV testing was performed by droplet digital PCR (ddPCR), using 24ng DNA, 1.2  $\mu$ L of each PrimePCR (Cat#10031276, custom designed *PKD1* and *PKD2* CNV assay) and the Copy Number Reference Assay RPP30 (67 bp, UniqueAssayID: dHsaCP2500350), labeled with FAM and HEX dyes, respectively, 12  $\mu$ L of the ddPCR™ Supermix (no dUTPs) and 1.2  $\mu$ L of diluted HaeIII or HingIII enzyme (New England Biolabs, Ipswich, MA) in a total reaction volume of 24  $\mu$ L, according to the manufacturer's instructions (PrimePCR ddPCR CNV Assay, Bio-Rad, Hercules, CA). Droplets were generated in a QX200 droplet generator (Bio-Rad). PCR was performed in duplicate in a C1000 Touch PCR thermal cycler, and the results were read in a QX200 droplet reader (BioRad).

## **Statistical Analysis**

Each parameter is expressed as the mean  $\pm$  SD. Two-tailed Student t-test was used to compare normally distributed variables, otherwise, a nonparametric test was applied (i.e., Wilcoxon Rank Sum test). The association between somatic variant count and cyst size was analyzed using linear mixed effects model with log (pathogenic count) as the outcome and age and diameters as predictors. The log transform of pathogenic count was performed in order to satisfy normality assumptions. A random intercept was included for each subject in order to adjust for within subject correlation. These analyses were performed using the "lme" function within the "nlme" package in the R software environment (<https://cran.r-project.org/web/packages/nlme/index.html>).

## REFERENCES

1. Loghman-Adham, M., Nauli, S.M., Soto, C.E., Kariuki, B., and Zhou, J. (2003). Immortalized epithelial cells from human autosomal dominant polycystic kidney cysts. *Am J Physiol Renal Physiol* 285, F397-412.
2. Tan, Y.C., Blumenfeld, J.D., Anghel, R., Donahue, S., Belenkaya, R., Balina, M., Parker, T., Levine, D., Leonard, D.G., and Rennert, H. (2009). Novel method for genomic analysis of PKD1 and PKD2 mutations in autosomal dominant polycystic kidney disease. *Hum Mutat* 30, 264-273.
3. Tan, A.Y., Michael, A., Liu, G., Elemento, O., Blumenfeld, J., Donahue, S., Parker, T., Levine, D., and Rennert, H. (2014). Molecular diagnosis of autosomal dominant polycystic kidney disease using next-generation sequencing. *J Mol Diagn* 16, 216-228.
4. Zhang, W., Tan, A.Y., Blumenfeld, J., Liu, G., Michael, A., Zhang, T., Robinson, B.D., Salvatore, S.P., Kapur, S., Donahue, S., et al. (2016). Papillary renal cell carcinoma with a somatic mutation in MET in a patient with autosomal dominant polycystic kidney disease. *Cancer Genet* 209, 11-20.
5. Kircher, M., Witten, D.M., Jain, P., O'Roak, B.J., Cooper, G.M., and Shendure, J. (2014). A general framework for estimating the relative pathogenicity of human genetic variants. *Nat Genet* 46, 310-315.
